# Supplementary material for: Routine Vaccination Coverage in Northern Nigeria: Results from 40 District-Level Cluster Surveys, 2014-2015
Source: PubMed Central journal article supplement (PMC5148043; doi:10.1371/journal.pone.0167835), 2016-12-09

## **Supplementary Appendix 3**

## Routine immunization coverage estimates for each LGA, grouped by antigen

NB: All coverage estimates combine maternal recall + vaccine card data; complete coverage = 8 antigens (BCG, OPV 1, DPT 1, OPV 2, DPT 2, OPV 3, DPT 3, Measles); does not include OPV doses from SIAs.

The order of the LGAs within a state is based on DPT3 coverage. LGAs are grouped by state to illustrate variability in coverage across LGAs within the same state. This data is not representative of state-level coverage since LGAs were purposefully selected.

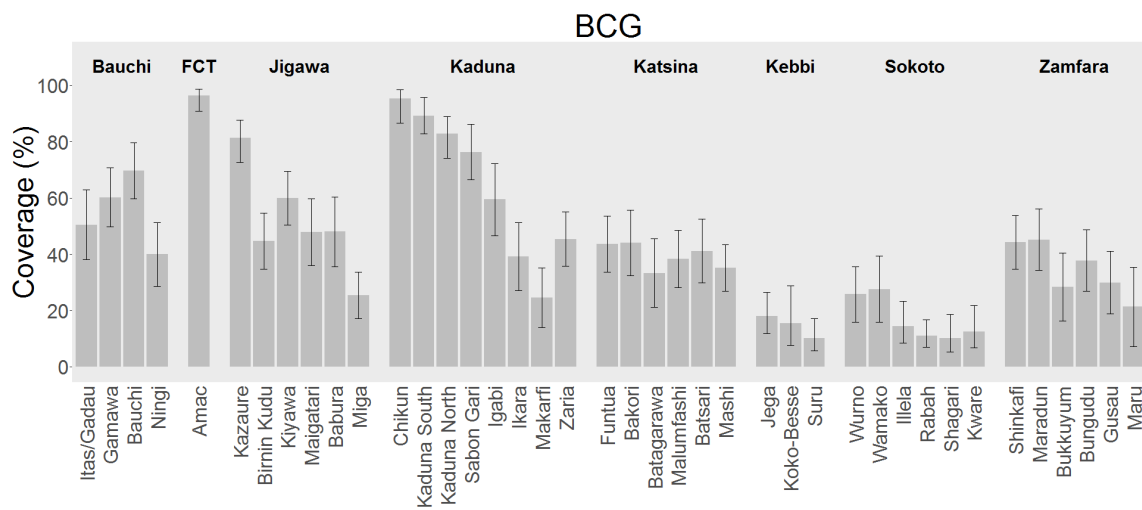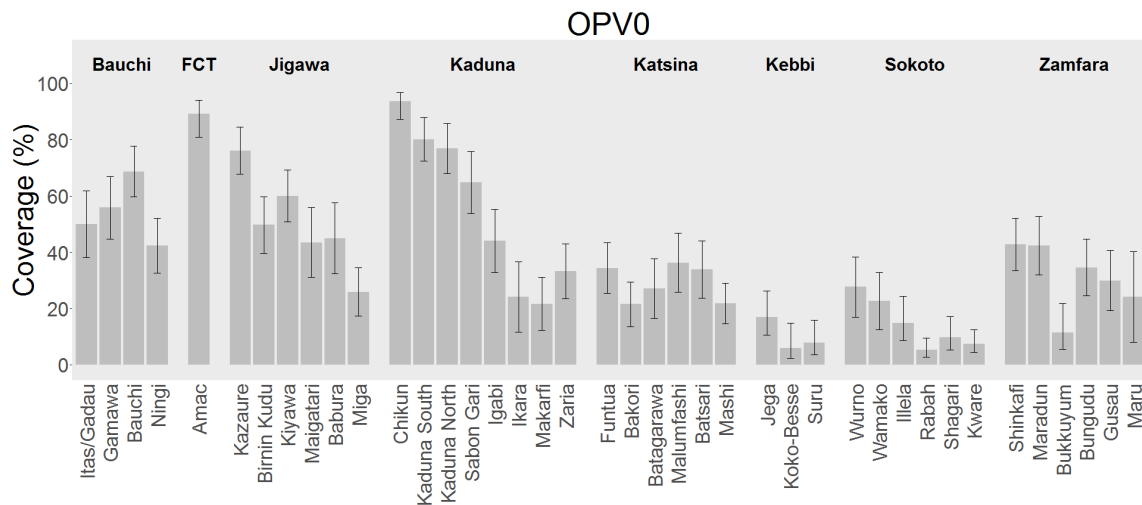

## OPV1

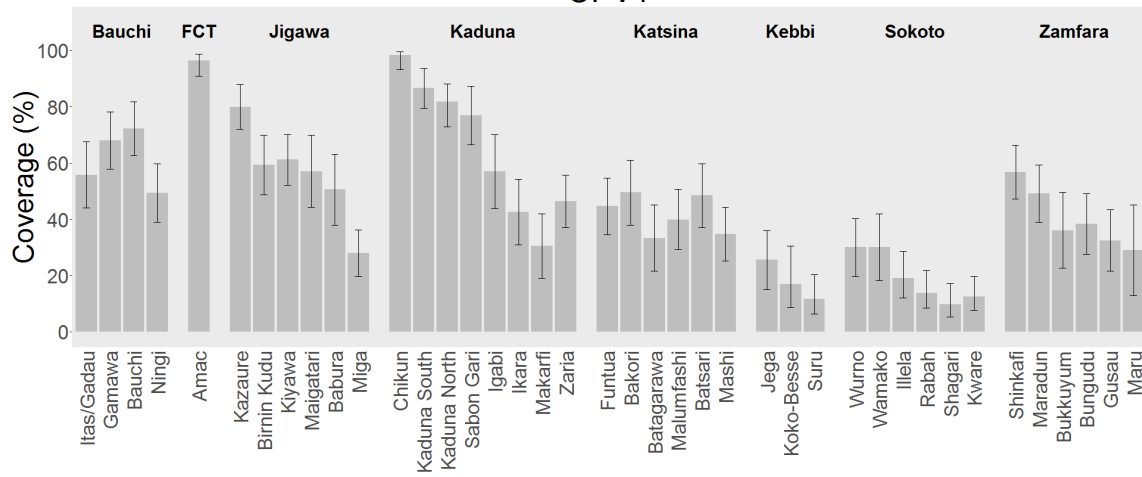

## DPT1

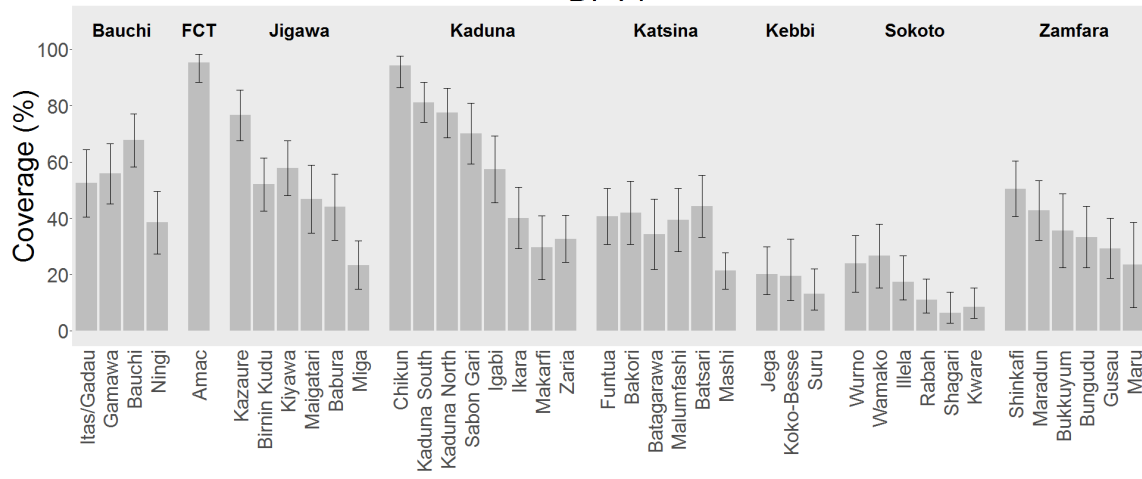

## OPV3

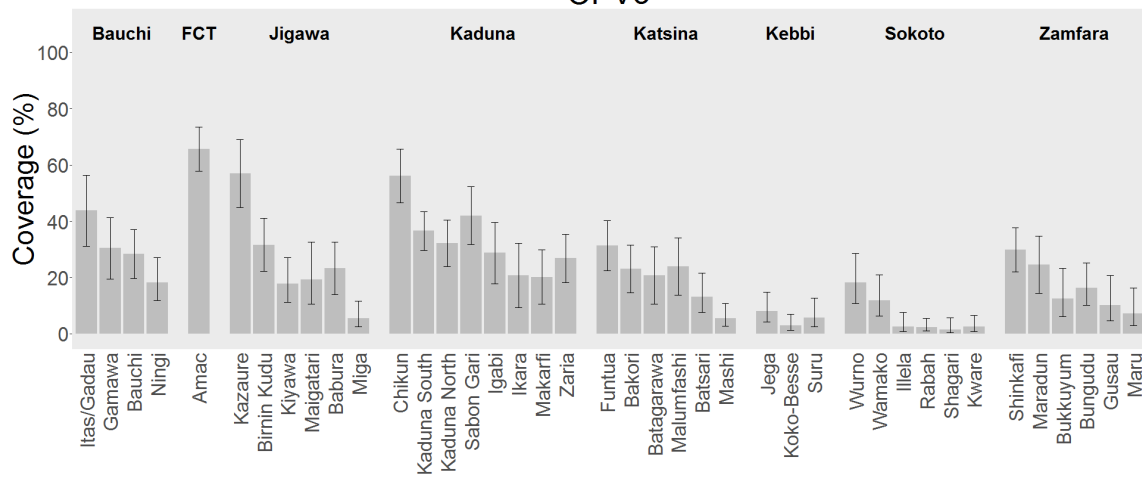

### DPT3

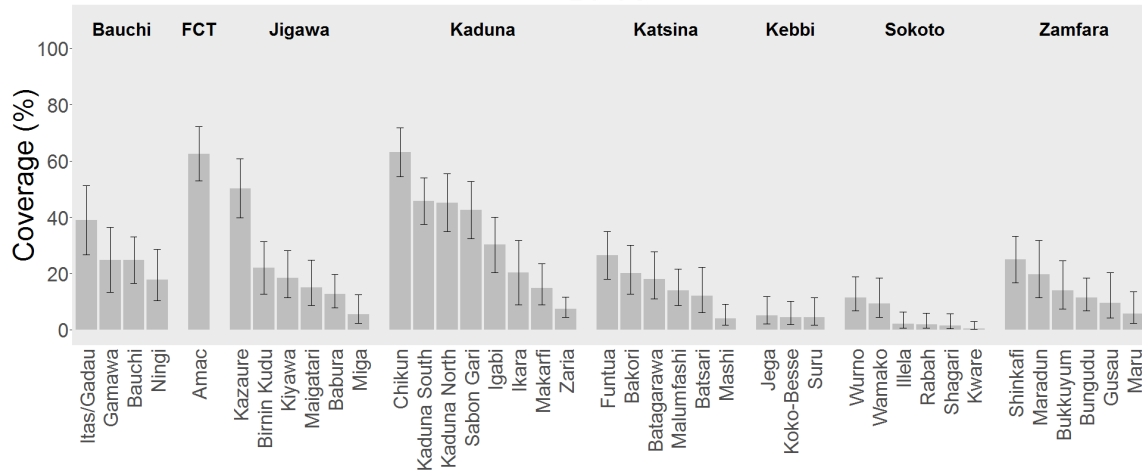

### MEASLES

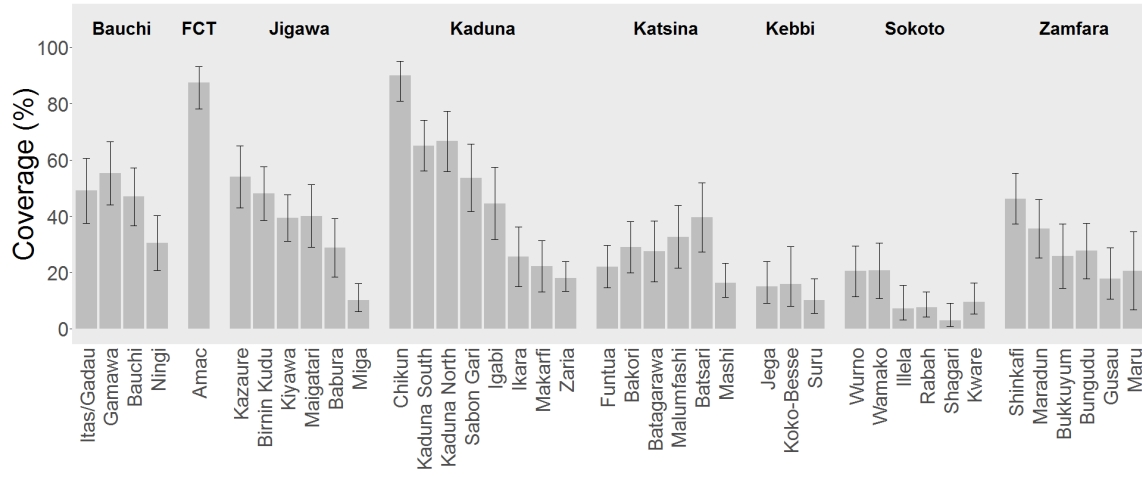

### COMPLETE

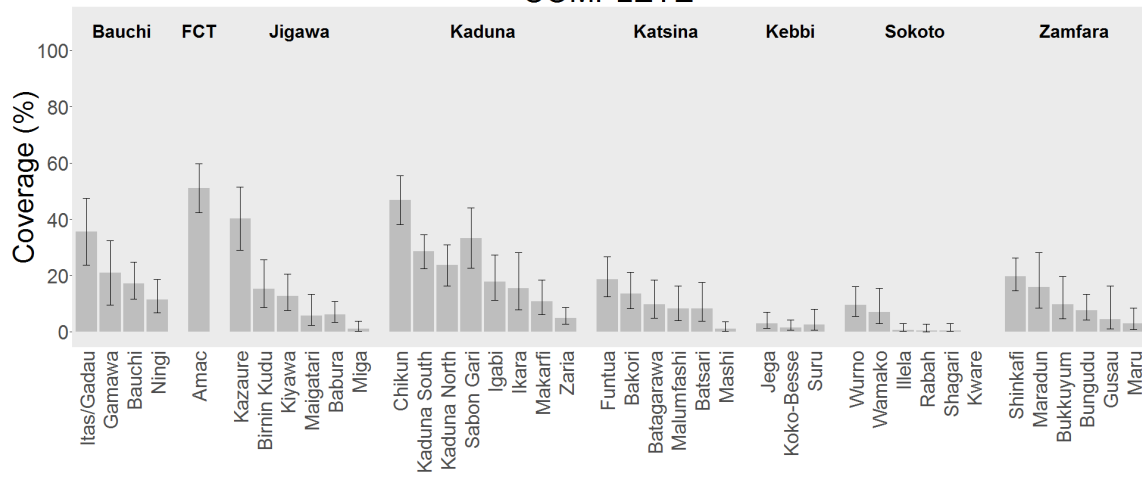

## Routine immunization coverage estimates, grouped by state

NB: All coverage estimates combine maternal recall + vaccine card data; complete coverage = 8 antigens (BCG, OPV 1, DPT 1, OPV 2, DPT 2, OPV 3, DPT 3, Measles); does not include OPV doses from SIAs.

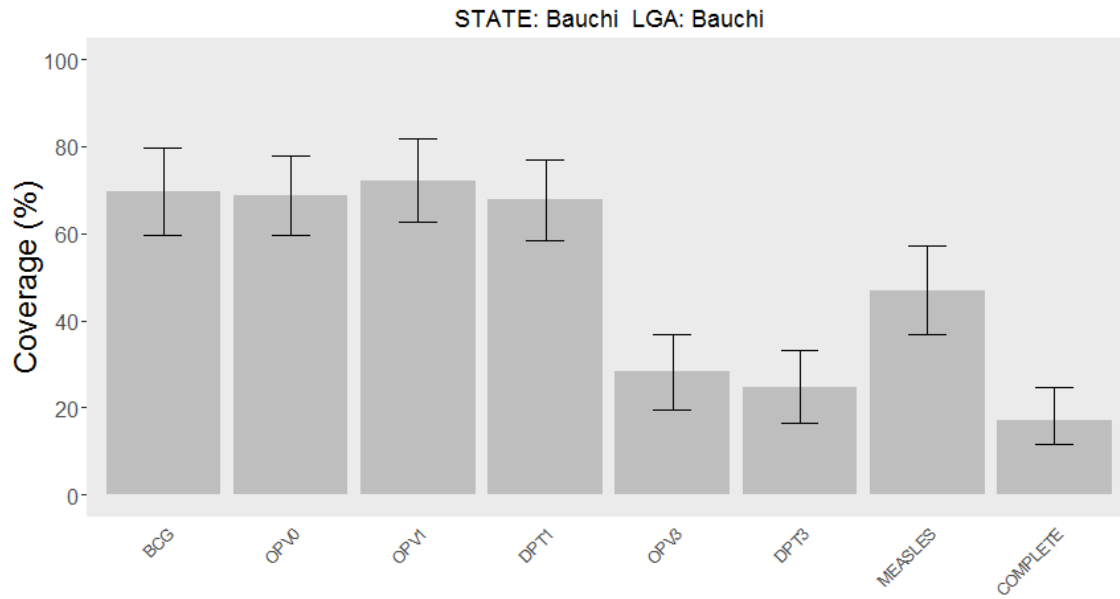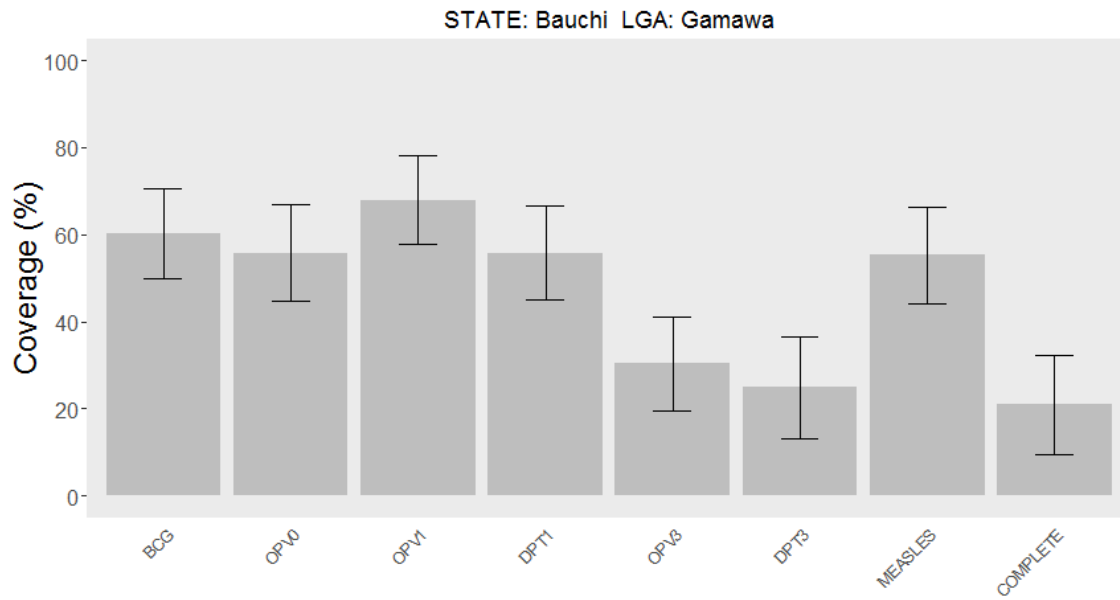

STATE: Bauchi LGA: Itas/Gadau

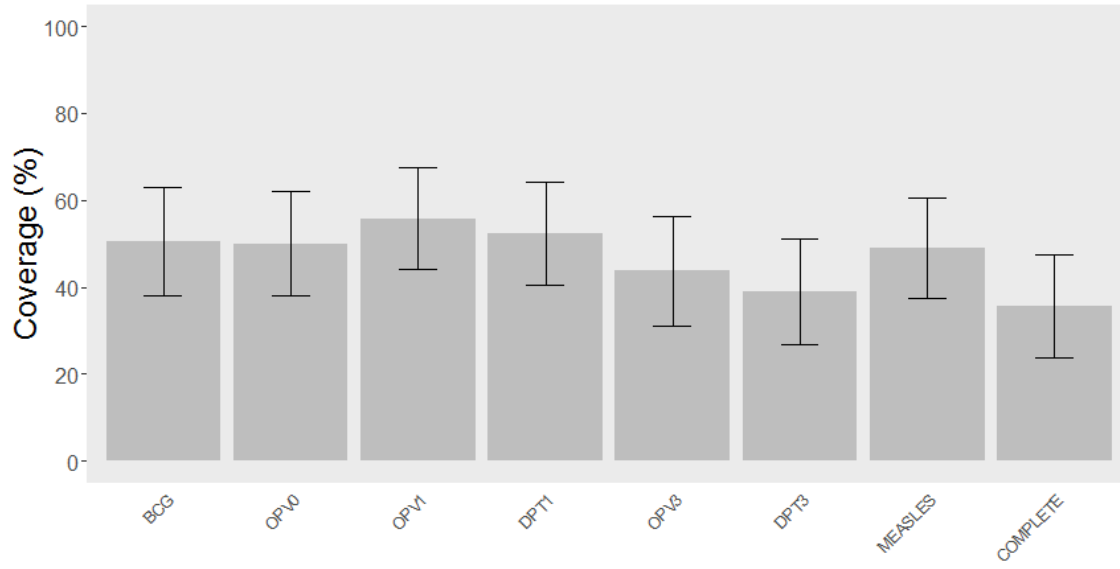

STATE: Bauchi LGA: Ningi

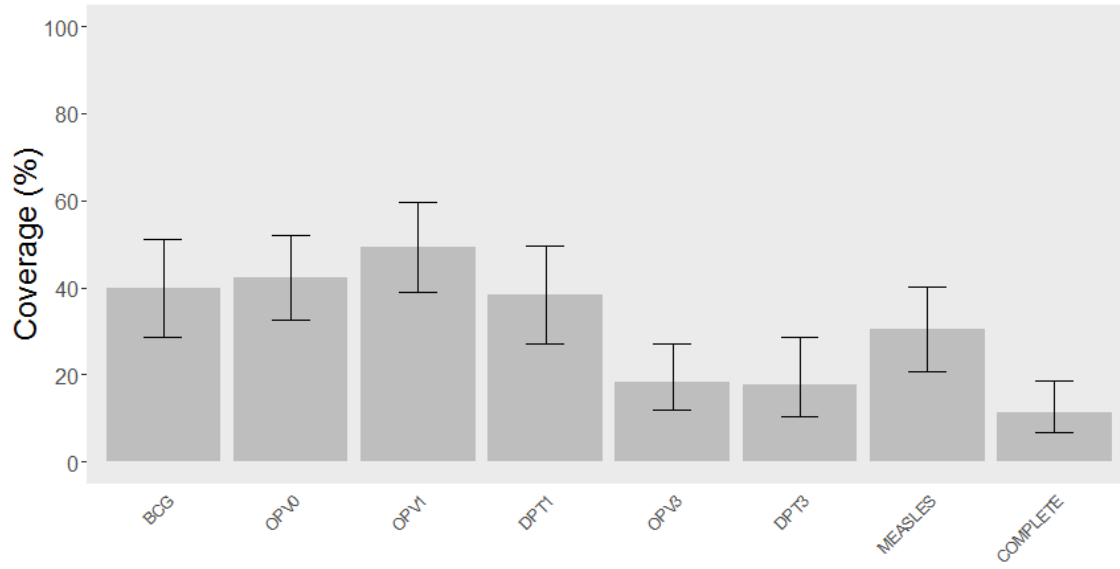

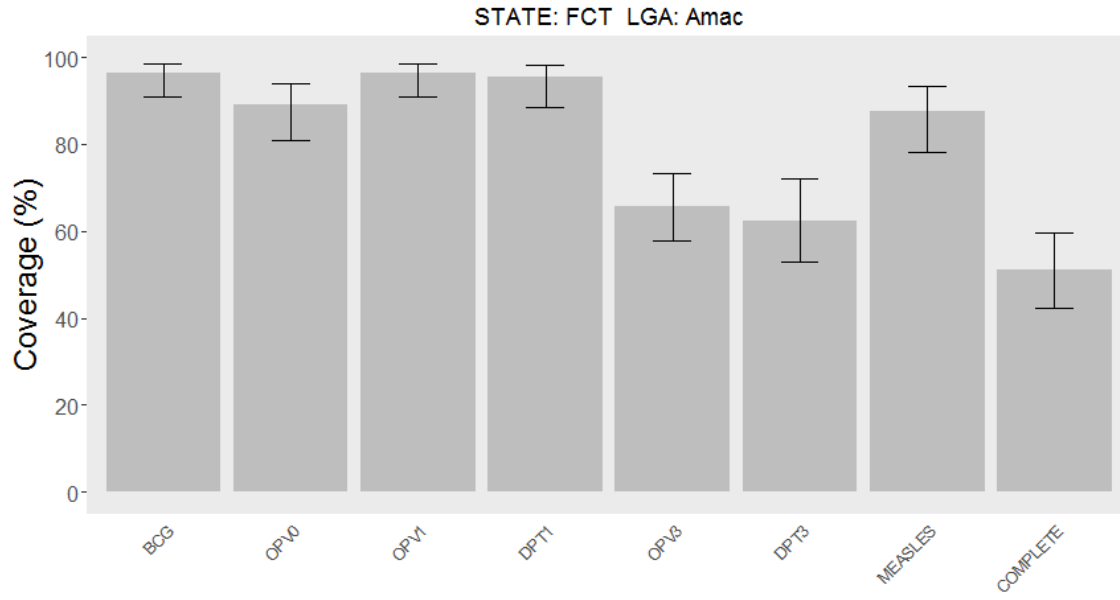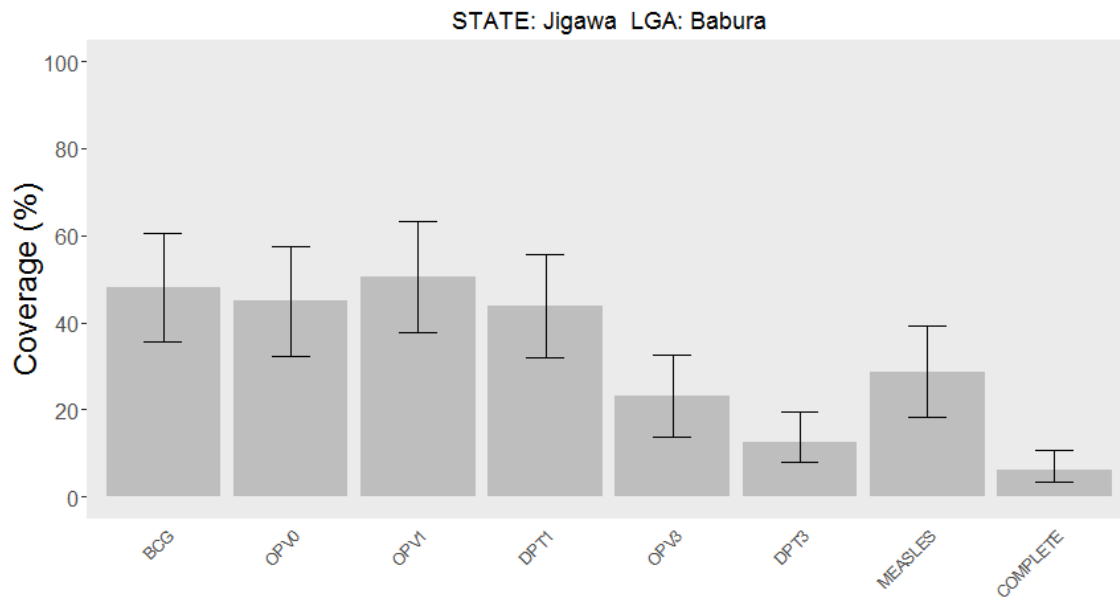

STATE: Jigawa LGA: Birnin Kudu

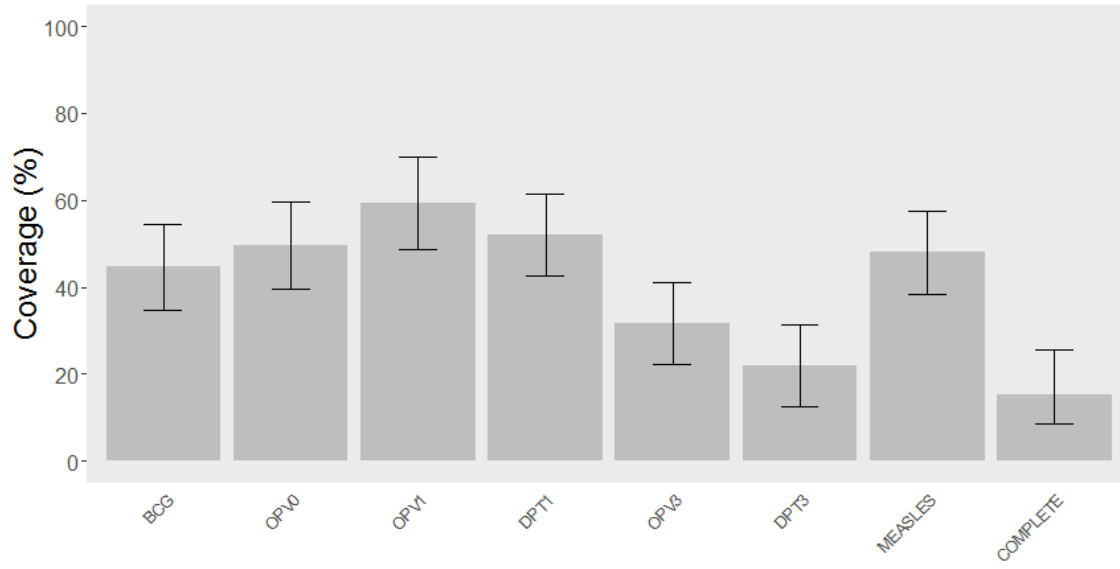

STATE: Jigawa LGA: Kazaure

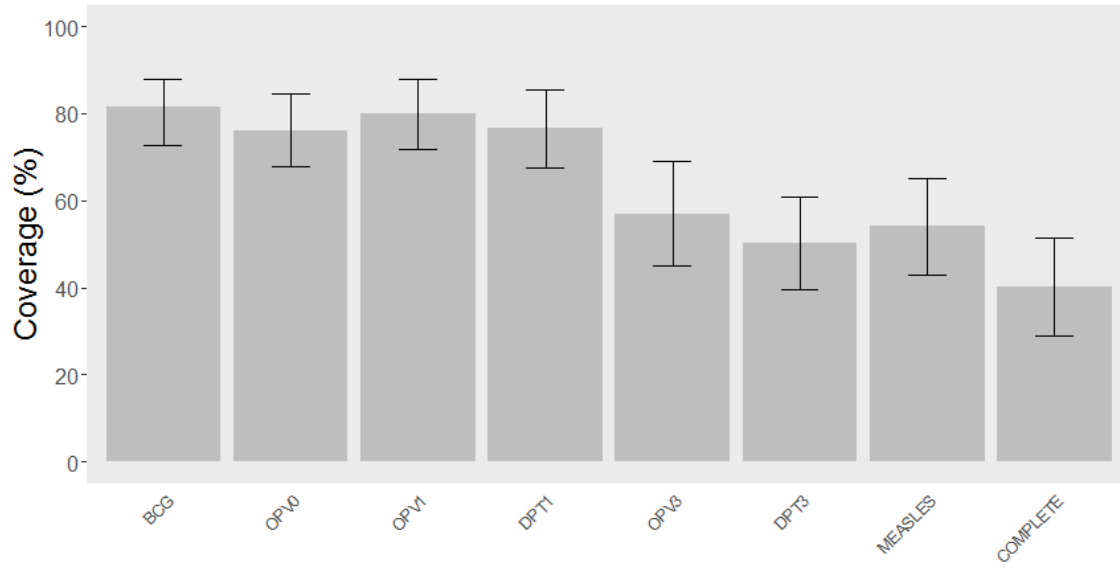



STATE: Jigawa LGA: Kiyawa

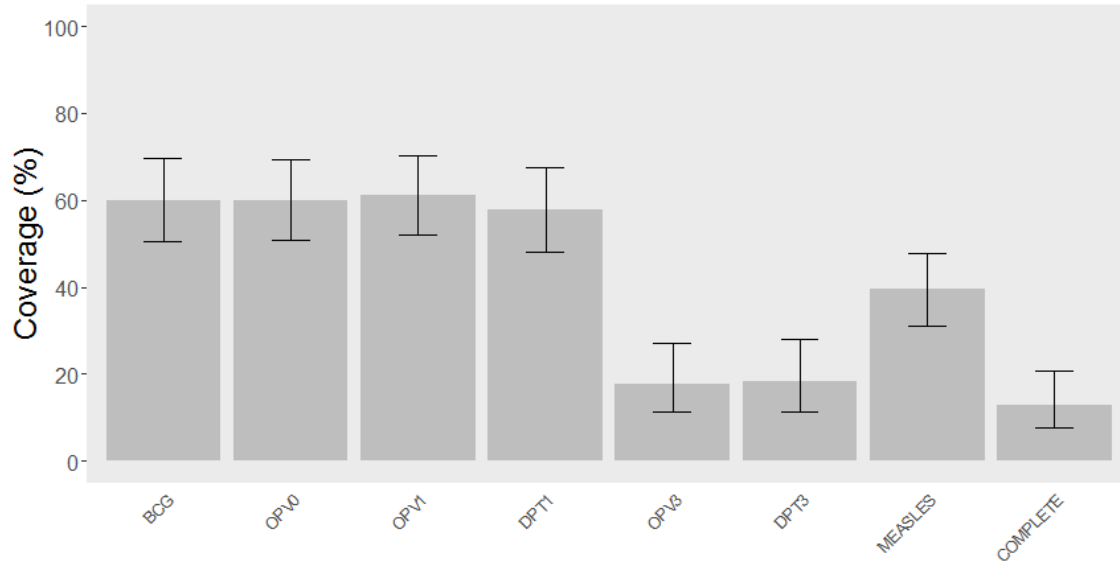

STATE: Jigawa LGA: Maigatari

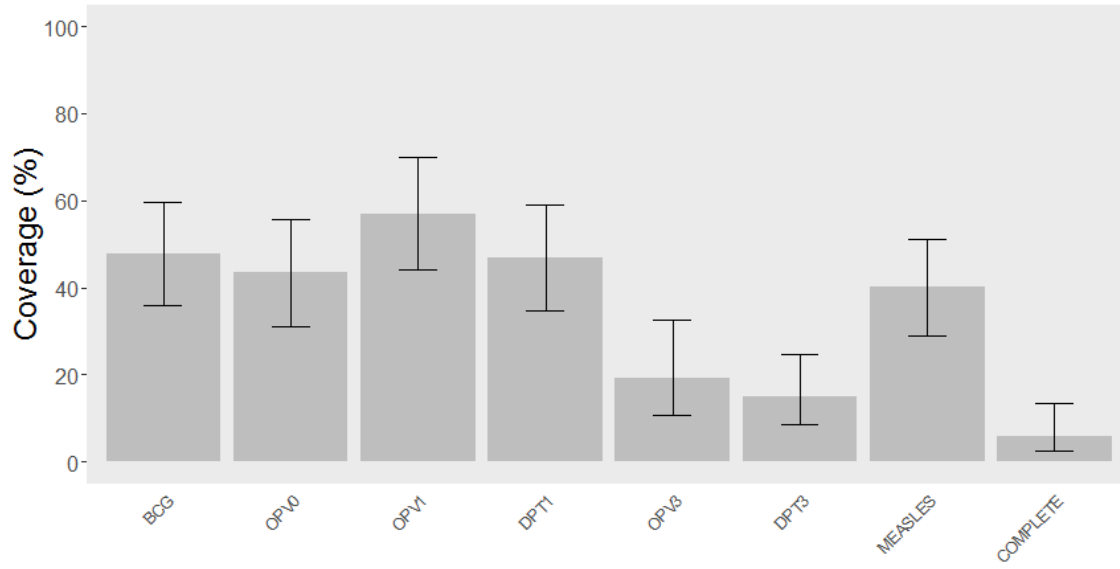

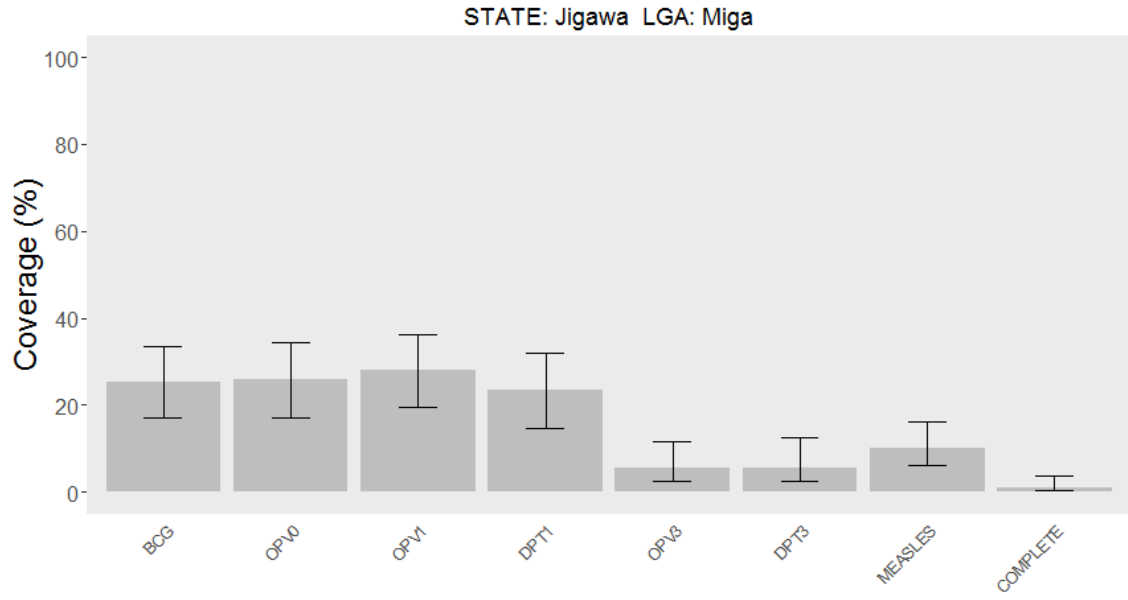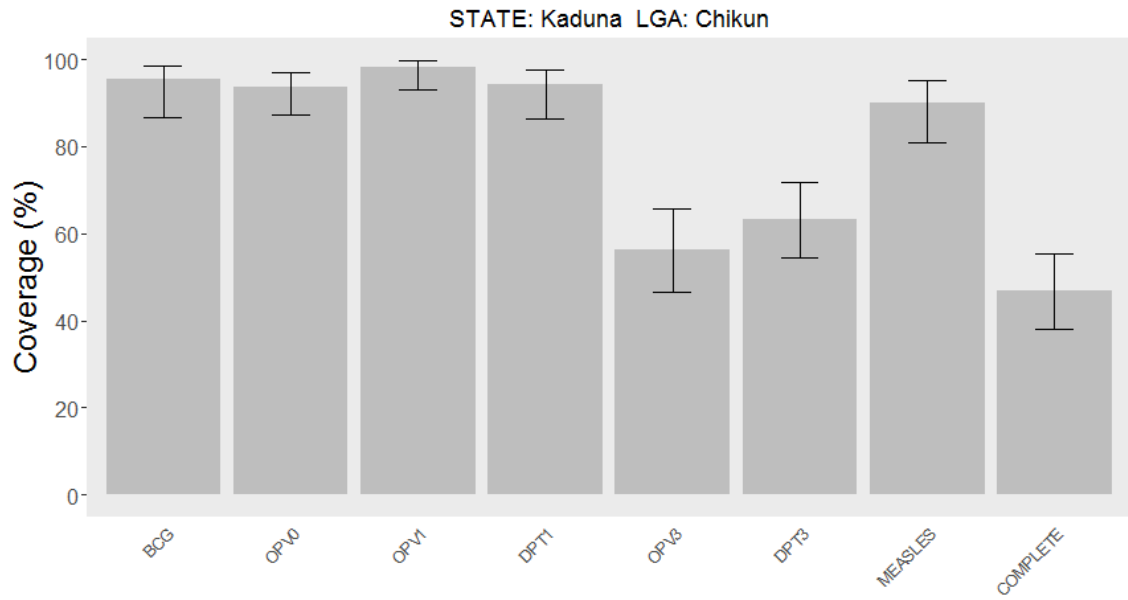

STATE: Kaduna LGA: Igabi

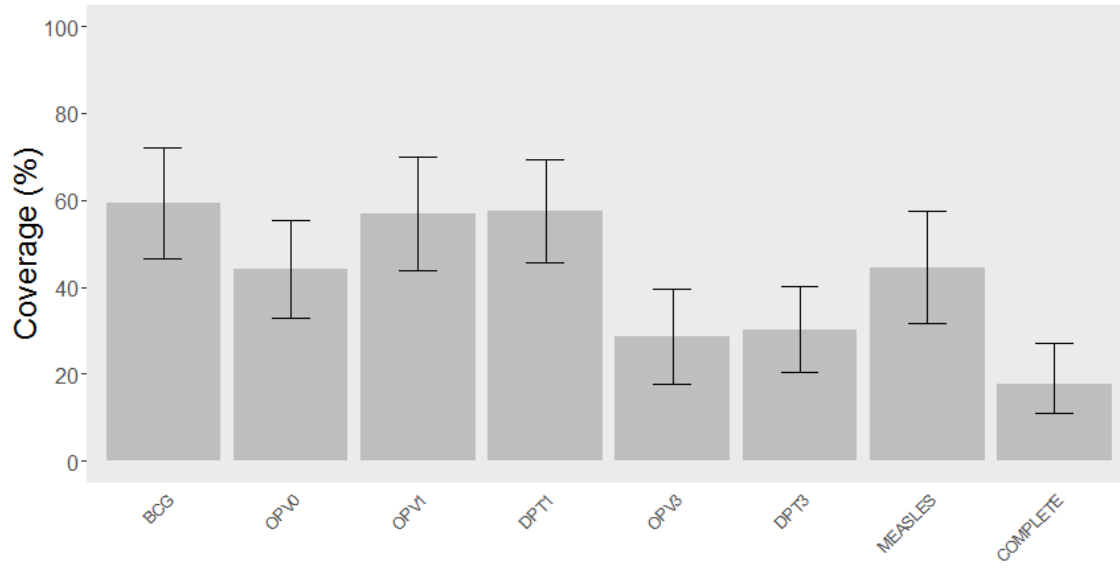

STATE: Kaduna LGA: Ikara

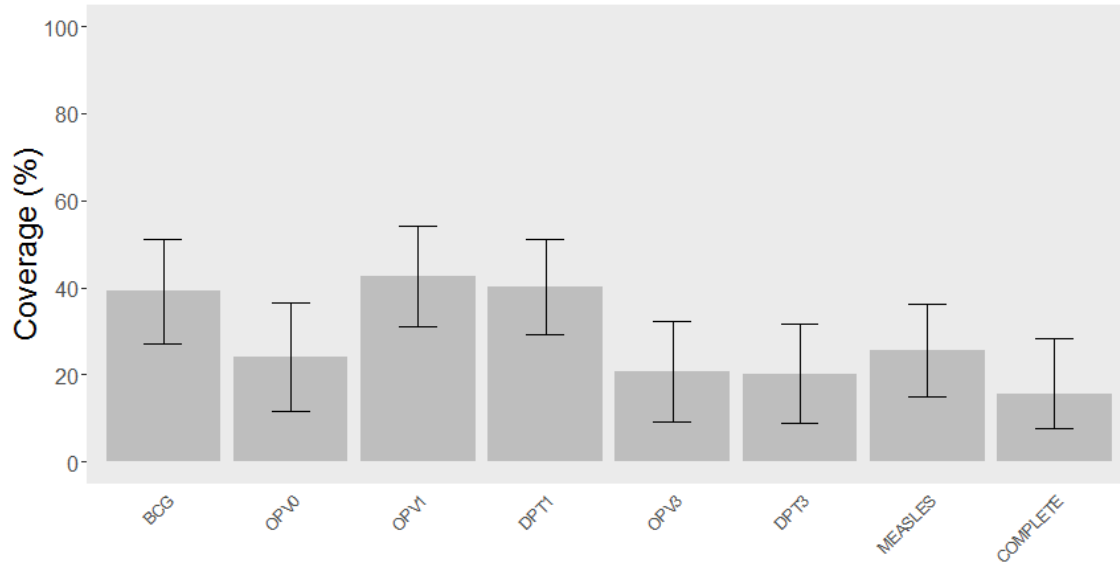

STATE: Kaduna LGA: Kaduna North

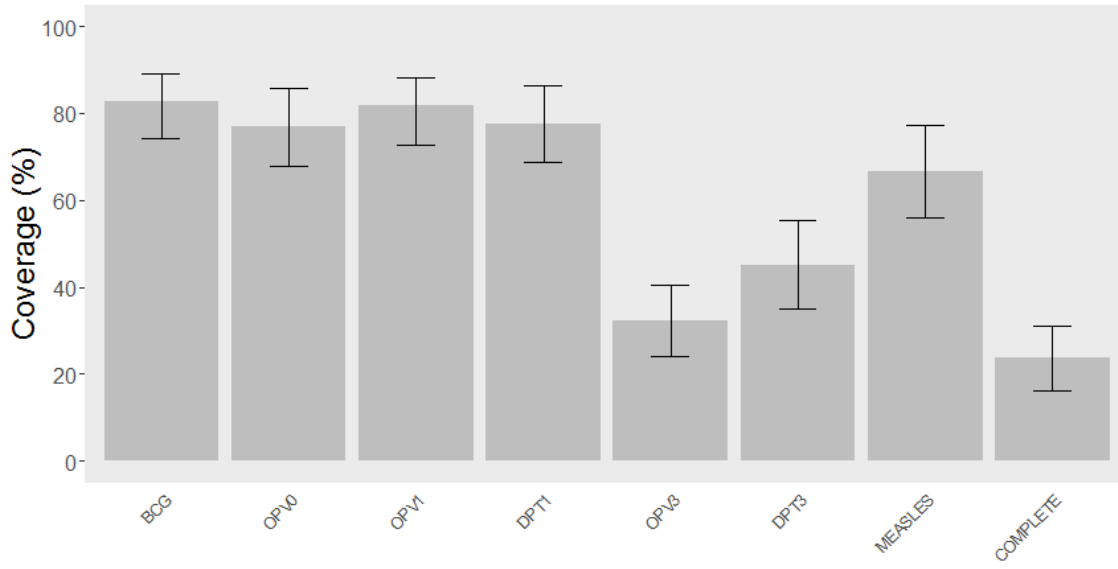

STATE: Kaduna LGA: Kaduna South

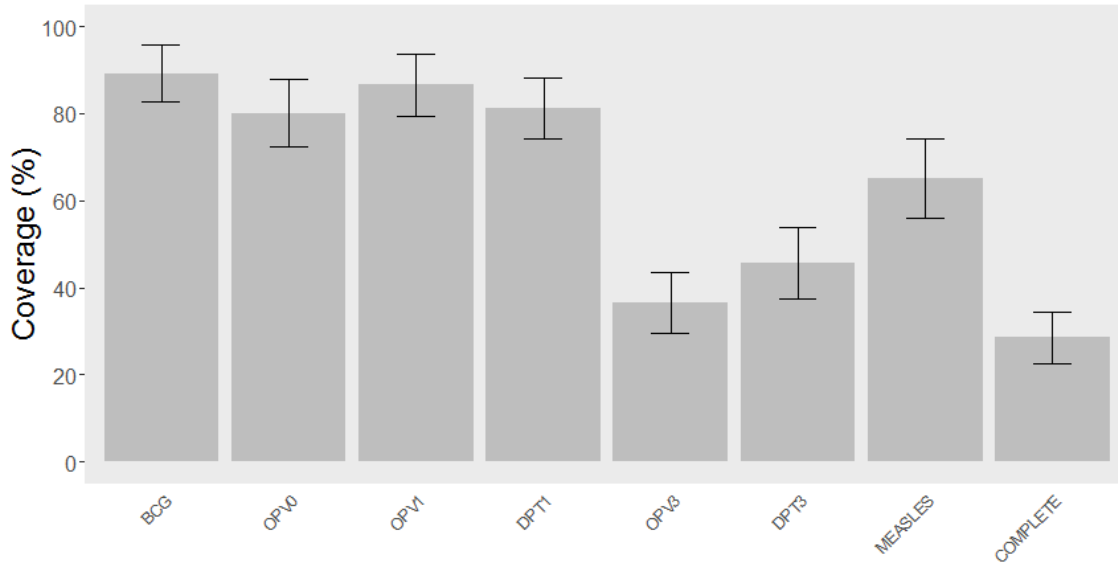

STATE: Kaduna LGA: Makarfi

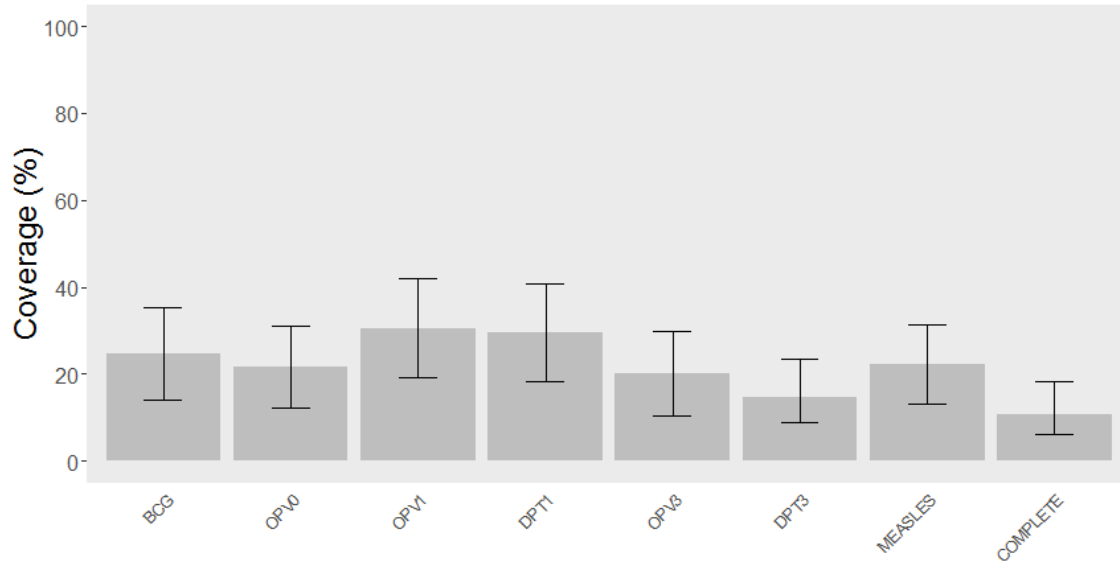

STATE: Kaduna LGA: Sabon Gari

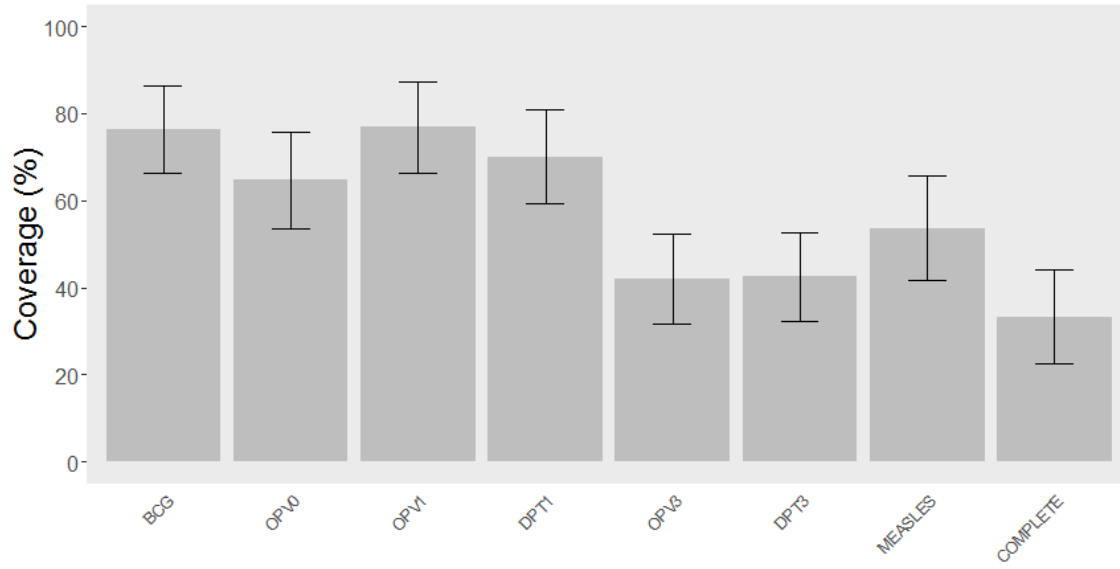

STATE: Kaduna LGA: Zaria

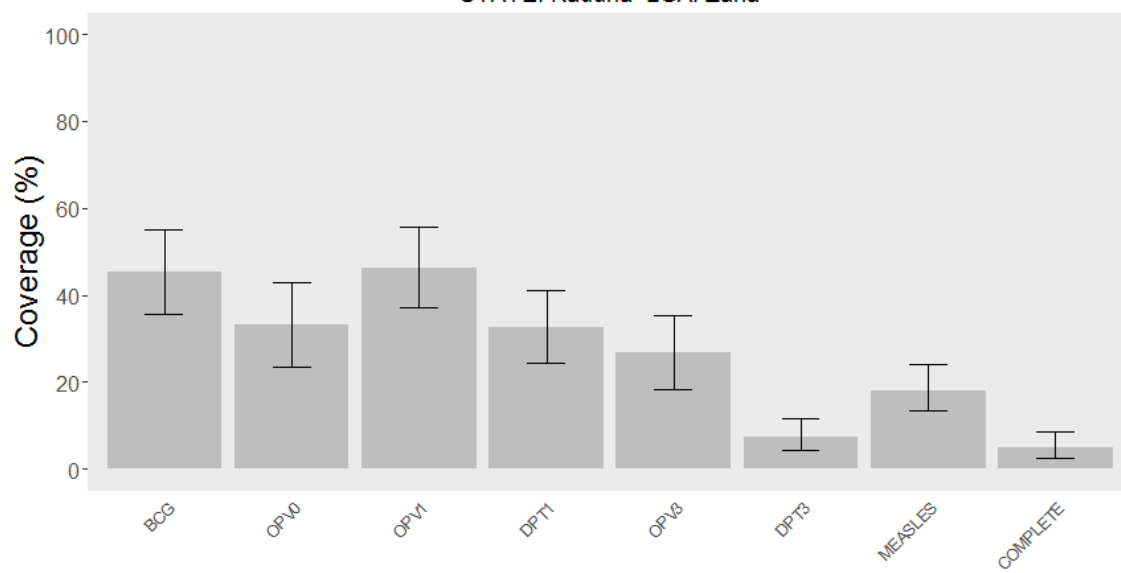

STATE: Katsina LGA: Bakori

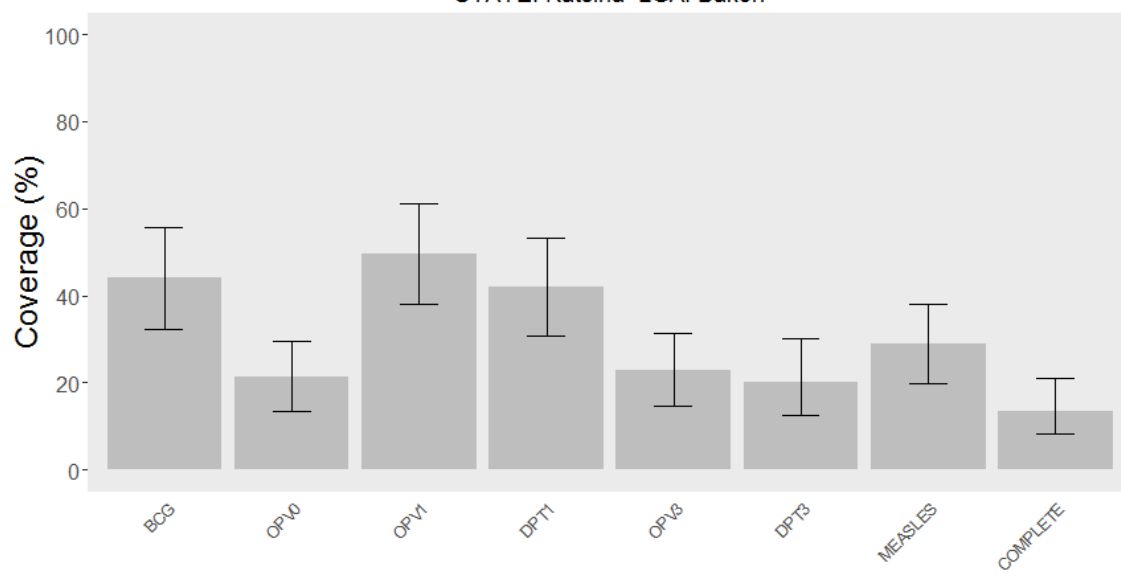

STATE: Katsina LGA: Batagarawa

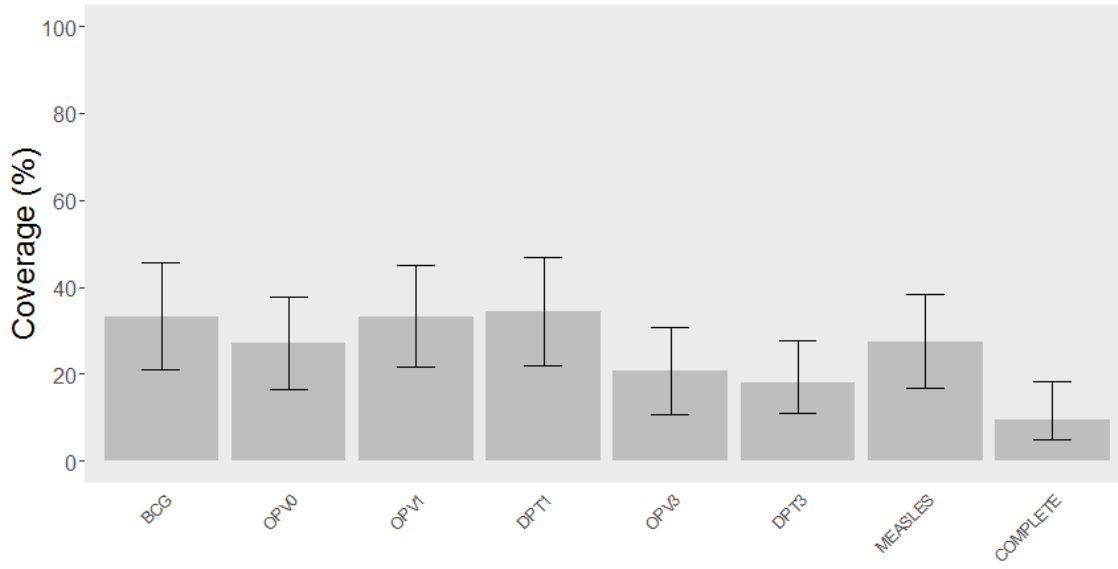

STATE: Katsina LGA: Batsari

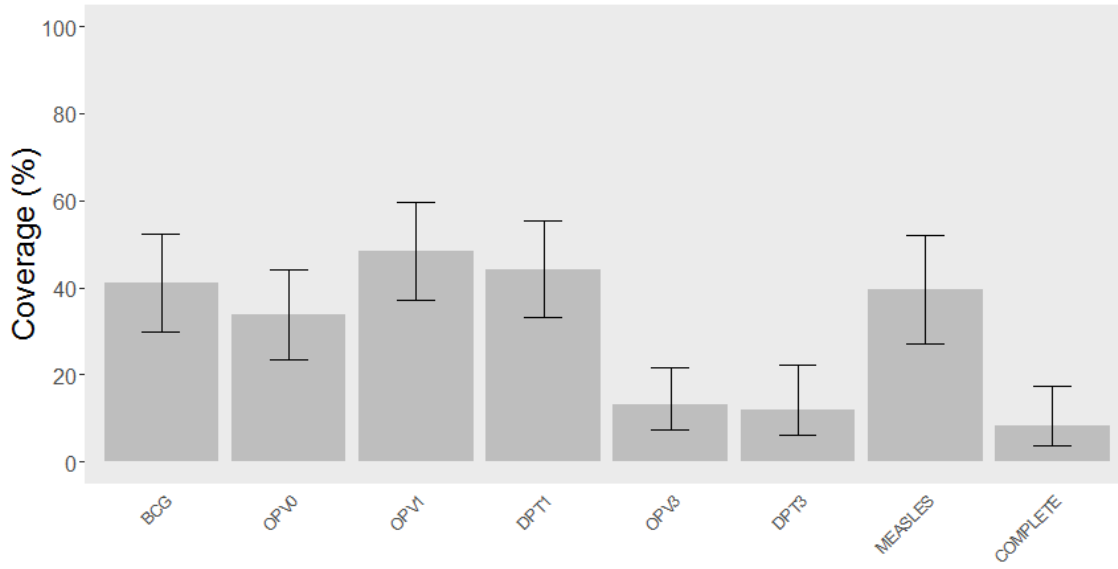

STATE: Katsina LGA: Funtua

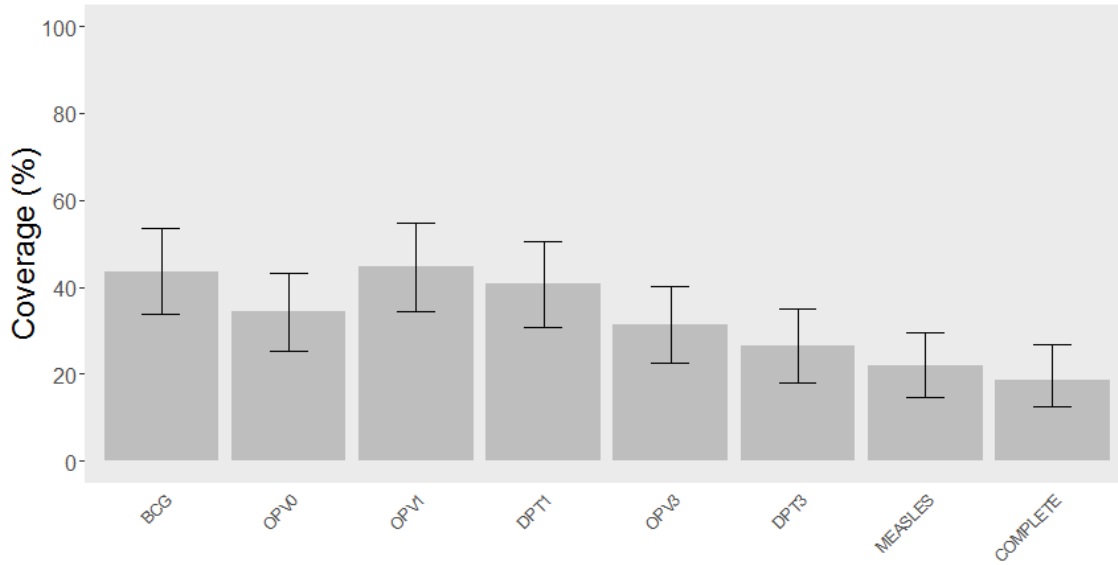

STATE: Katsina LGA: Malumfashi

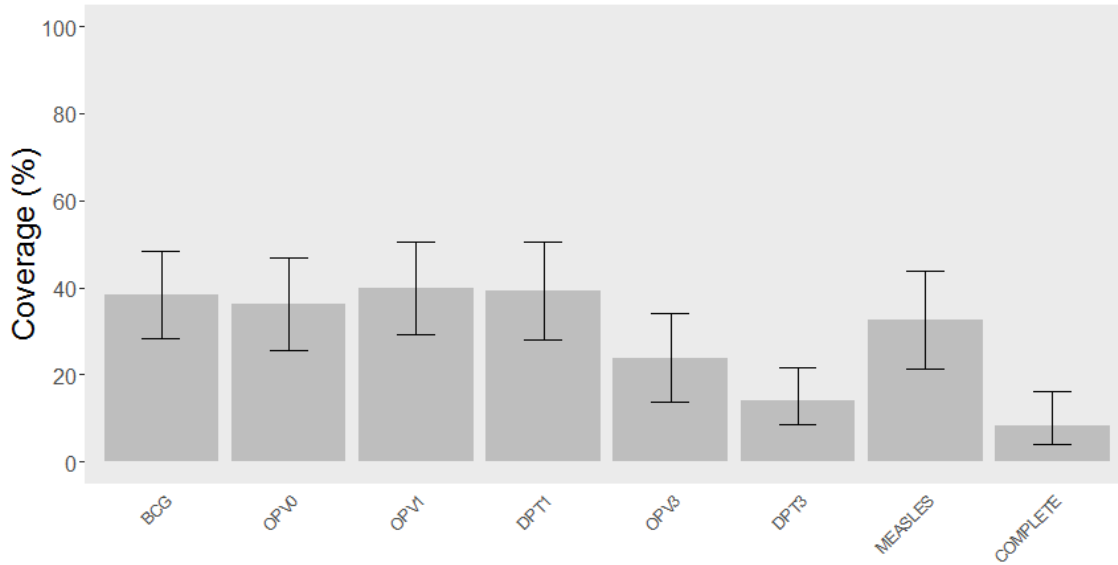



STATE: Katsina LGA: Mashi

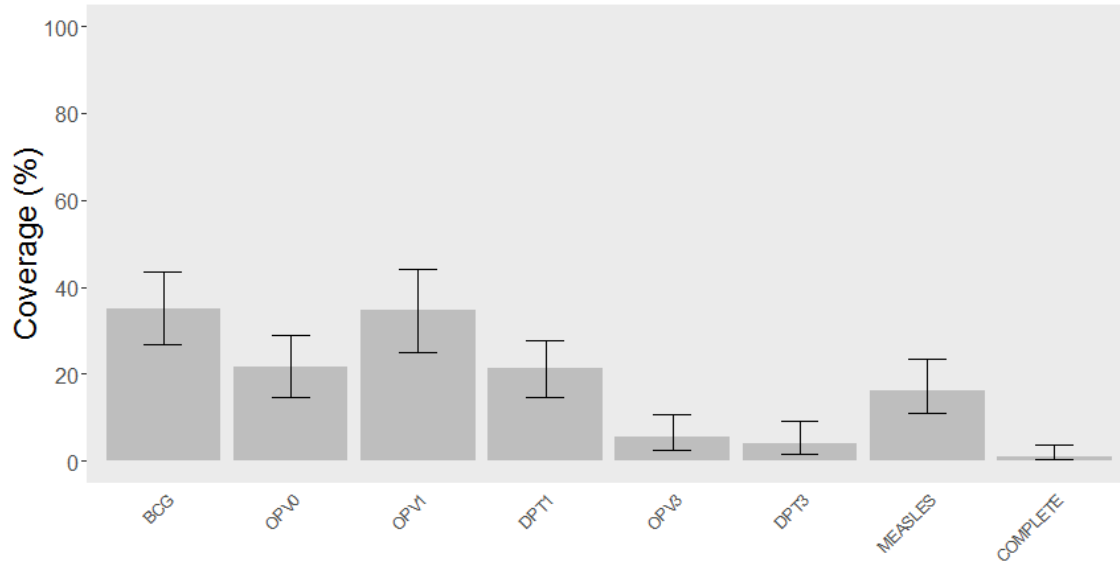

STATE: Kebbi LGA: Jega

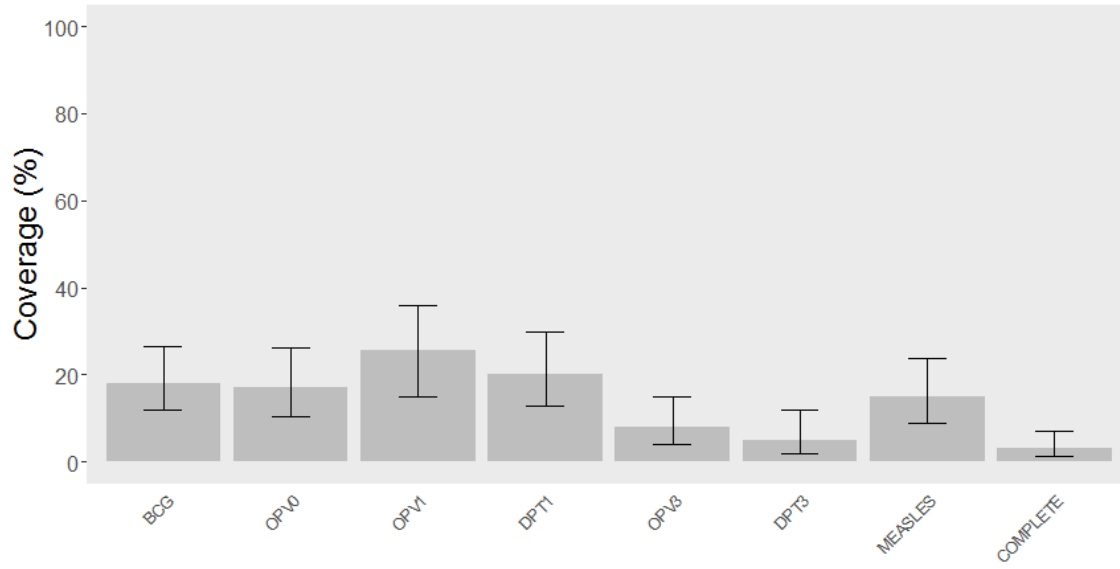

STATE: Kebbi LGA: Koko-Besse

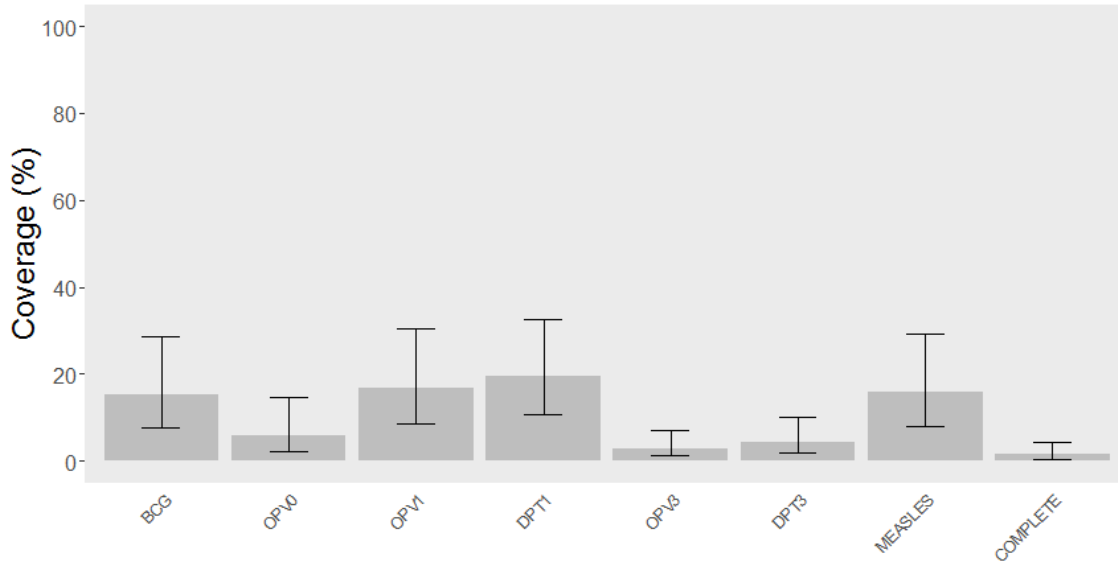

STATE: Kebbi LGA: Suru

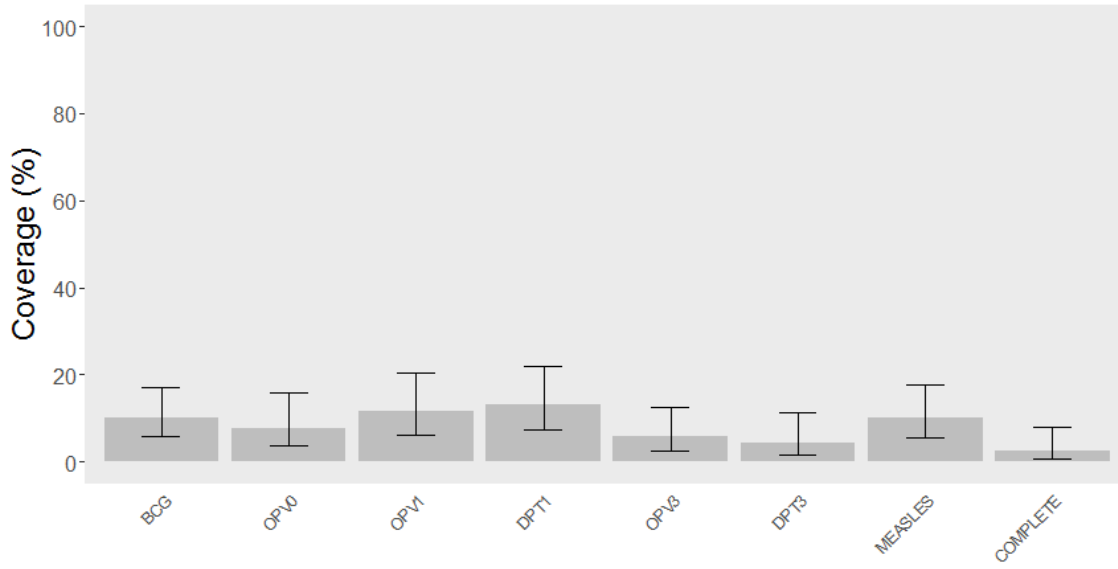

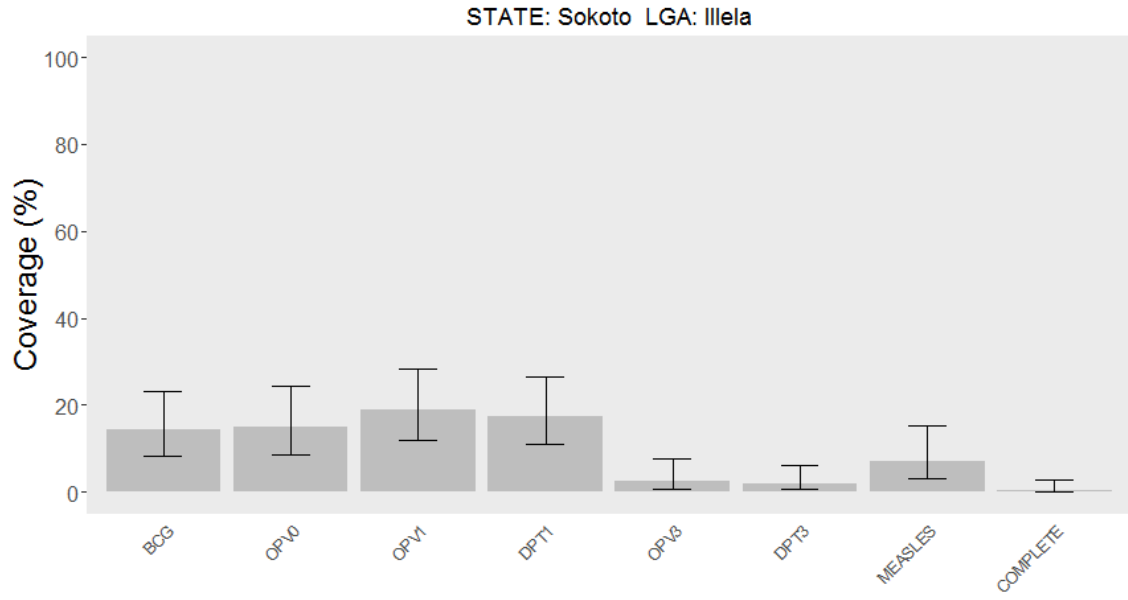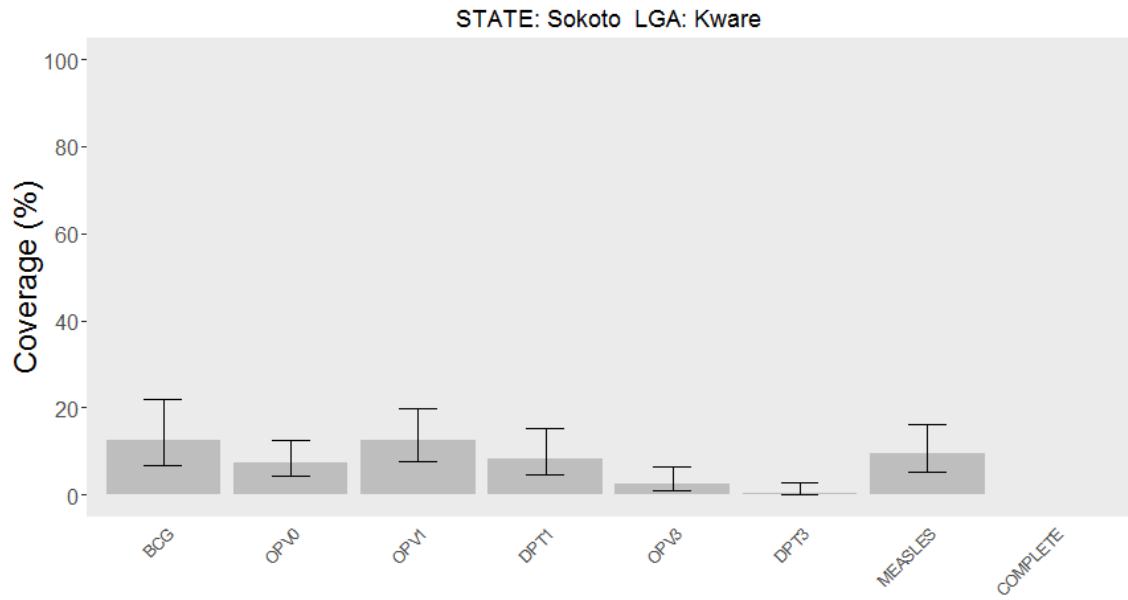

STATE: Sokoto LGA: Rabah

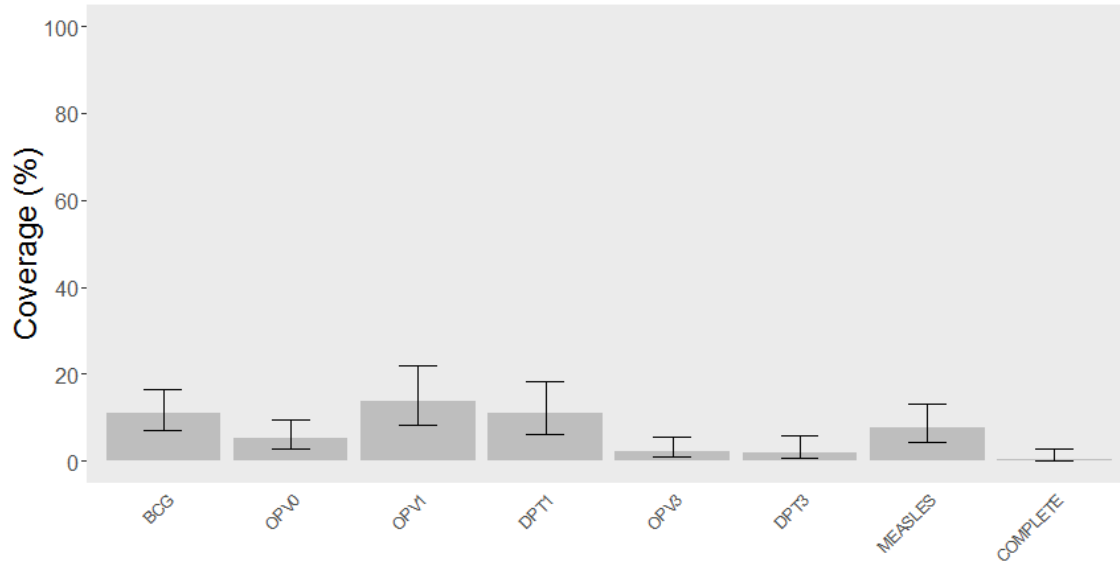

STATE: Sokoto LGA: Shagari

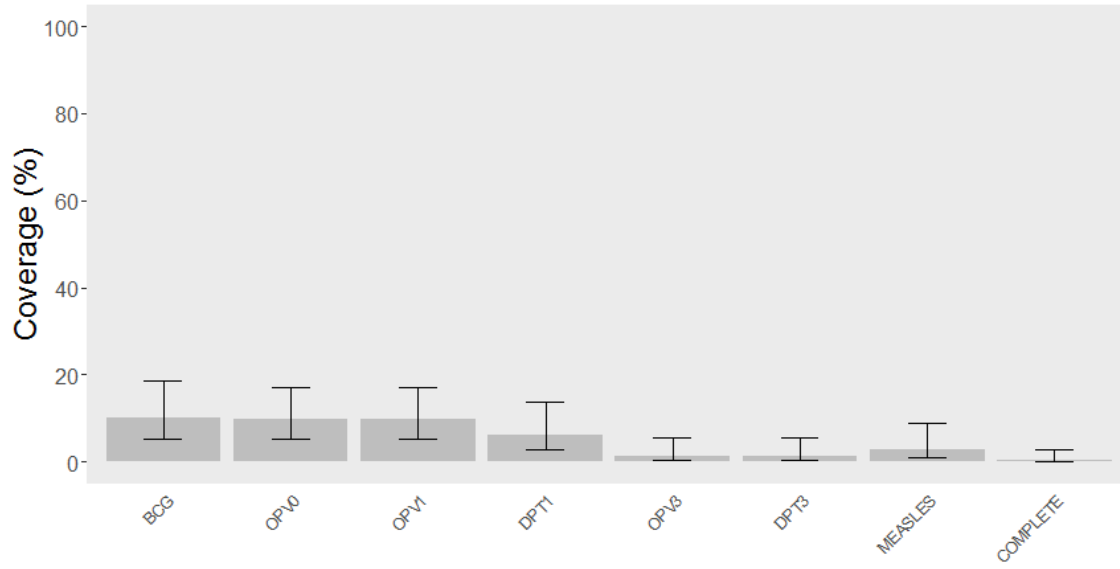

STATE: Sokoto LGA: Wamako

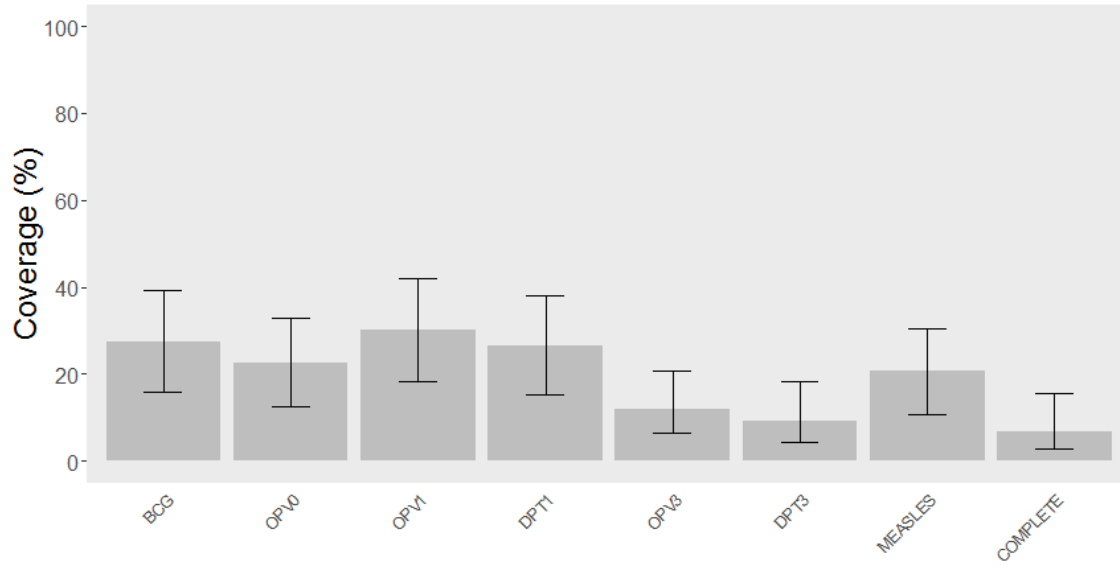

STATE: Sokoto LGA: Wurno

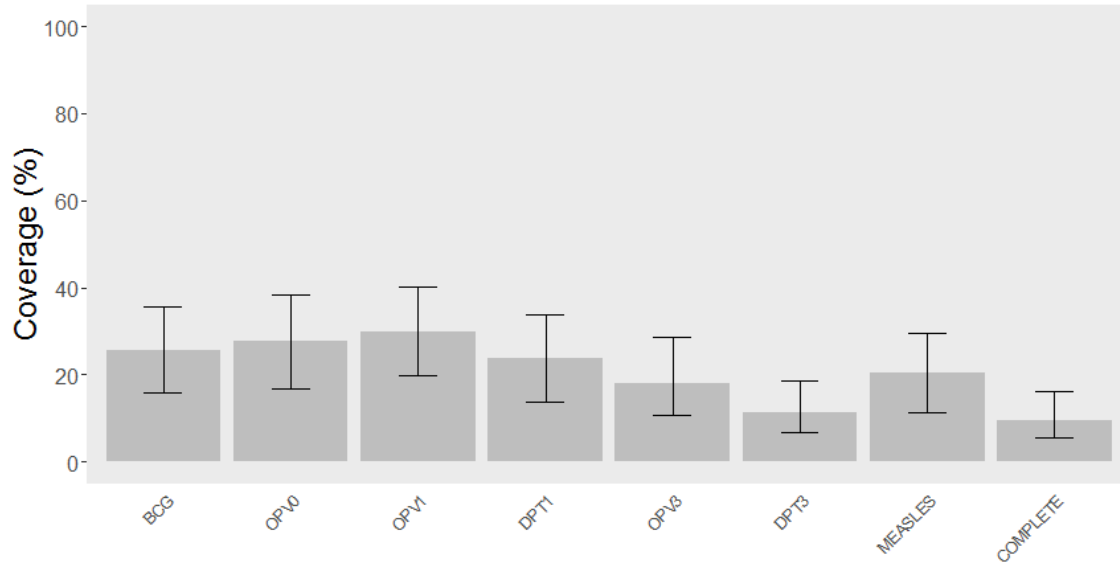

STATE: Zamfara LGA: Bukkuyum

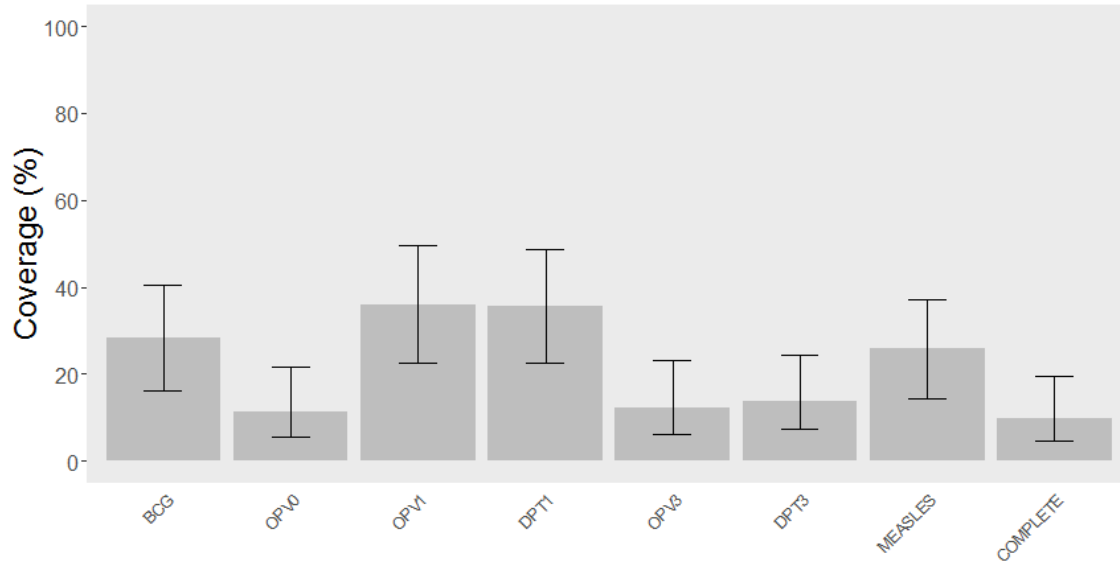

STATE: Zamfara LGA: Bungudu

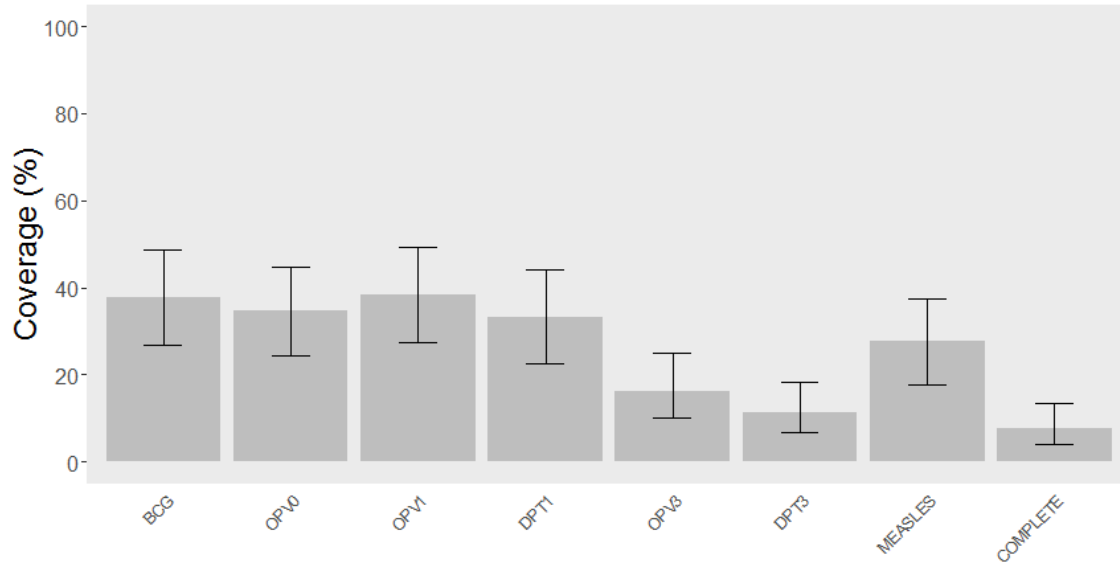

STATE: Zamfara LGA: Gusau

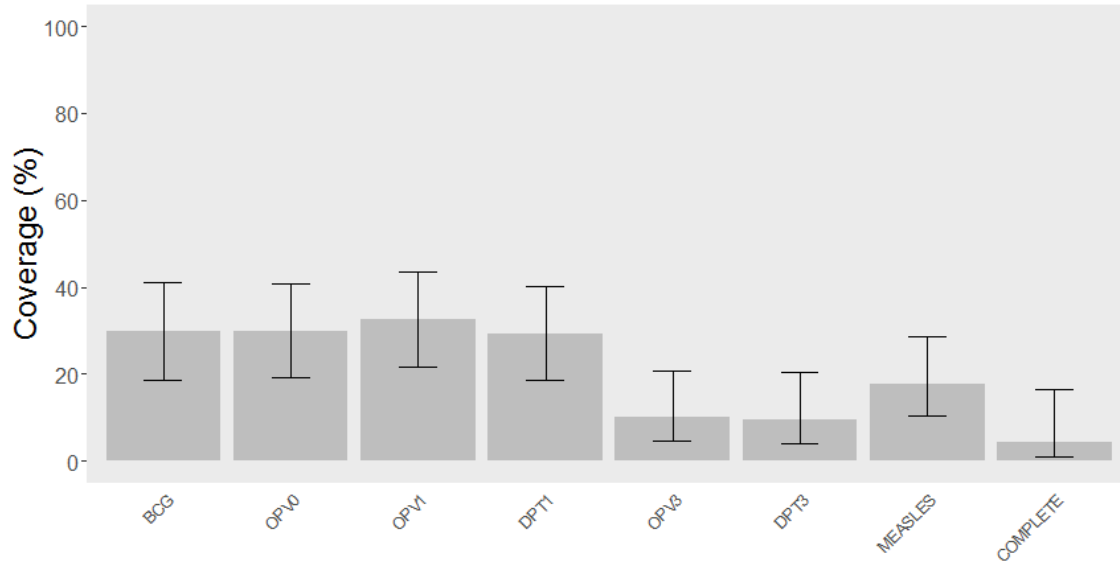

STATE: Zamfara LGA: Maradun

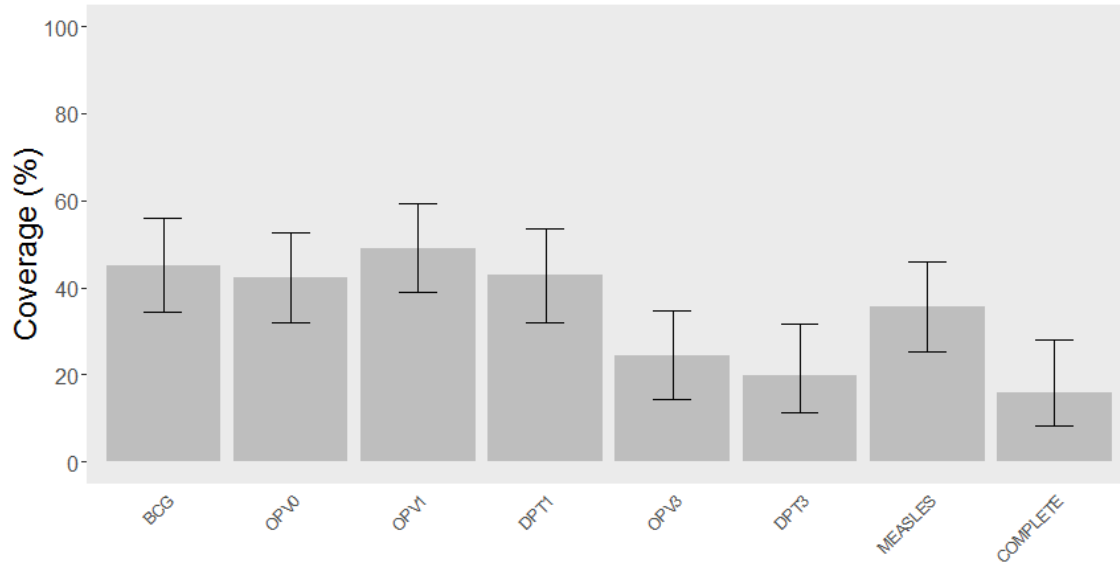

STATE: Zamfara LGA: Maru

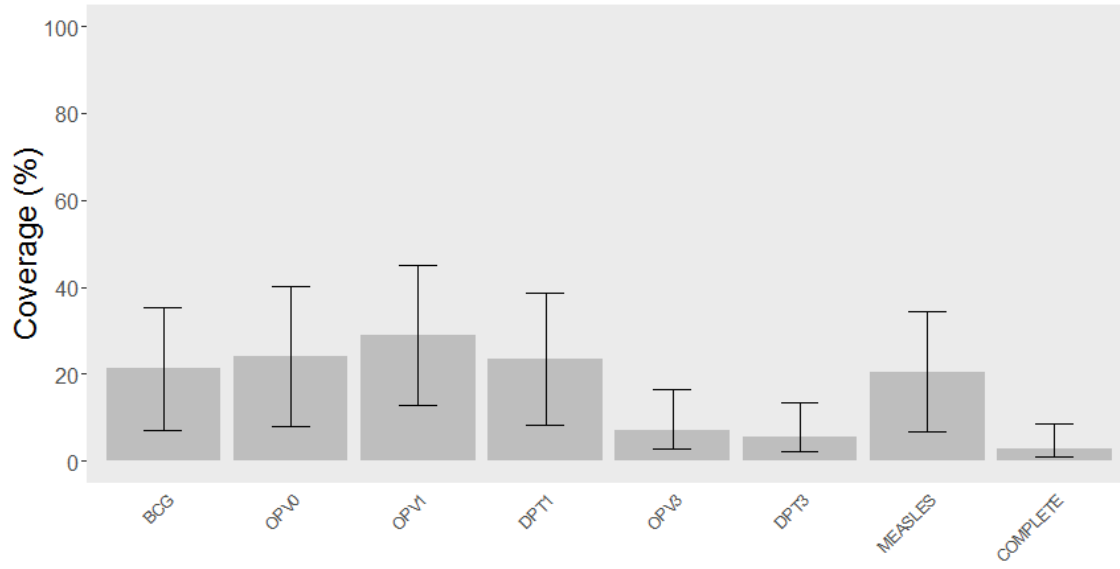

STATE: Zamfara LGA: Shinkafi

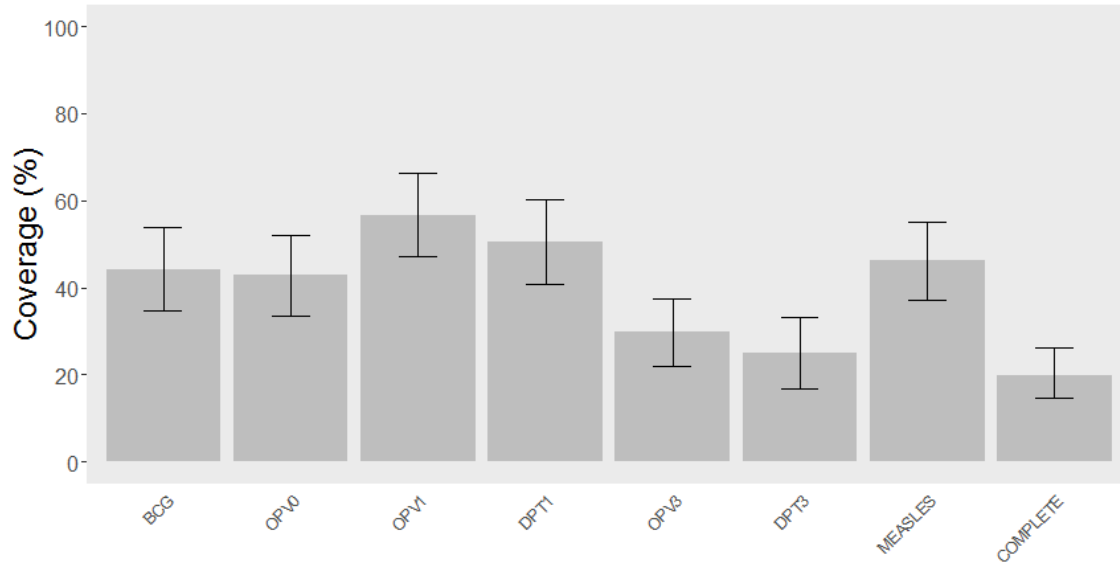

Supplement: pone.0167835.s003.pdf [file pone.0167835.s003.pdf]
