# Supplementary material for: Routine Vaccination Coverage in Northern Nigeria: Results from 40 District-Level Cluster Surveys, 2014-2015
Source: PubMed Central journal article supplement (PMC5148043; doi:10.1371/journal.pone.0167835), 2016-12-09
Supplement: pone.0167835.s001.pdf [file pone.0167835.s001.pdf]

**Form 1: Takadda Tambayoyi Bincike Kan Rigakafin Yau Da Kullum a Nijeriya**  
Nigeria Routine Immunization Coverage Survey Questionnaire, Phase 1

|                                                               |                                                                                    |
|---------------------------------------------------------------|------------------------------------------------------------------------------------|
| <b>Jiha</b><br>State name                                     | <input type="text"/>                                                               |
| <b>Lambar karamar hukuma</b><br>LGA number                    | __ __ __                                                                           |
| <b>Sunan karamar hukuma</b><br>LGA name                       | <input type="text"/>                                                               |
| <b>Sunan wuri</b><br>Locality name                            | <input type="text"/>                                                               |
| <b>Lambar unguwa</b><br>Cluster number                        | __ __                                                                              |
| <b>Sunan unguwa</b><br>Cluster name                           | <input type="text"/>                                                               |
| <b>Yanayin unguwa</b>                                         | <input type="checkbox"/> Birni / Urban<br><input type="checkbox"/> Karkara / Rural |
| <input type="checkbox"/> Birni / Urban<br>Cluster type        |                                                                                    |
| <input type="checkbox"/> Karkara / Rural                      |                                                                                    |
| <b>Lambar takardar neman bayani</b><br>Questionnaire number   | __ [1-7]                                                                           |
| <b>Lambar kungiyar masu ganawa</b><br>Interviewer team number | __ __                                                                              |
| <b>Sunan mai ganawa</b><br>Interviewer names                  | <input type="text"/>                                                               |
| <b>Lambar sufabaiza</b><br>Supervisor number                  | __                                                                                 |
| <b>Sunan sufabaiza</b><br>Supervisor name                     | <input type="text"/>                                                               |
| <b>Ranan ganawa</b><br>Date of interview                      | __ __ / __ __ / __ __ [Rana/wata/shekara]/[Day / Month / Year]                     |

**Matsayin gida a ganawa ta karshe [kungiya ta duba 1] / Household final interview status [CHECK ONE]**

- An samu cikkaken ganawa/ Complete interview  
 Ba'a samu chikkaken ganawa ba/ Partial interview

**Supervisor's questionnaire quality control check**

**Signature/date:** \_\_\_\_\_

Consent collected

All answers legible

Child selected using random number table

Dates filled correctly

Child was 12-23 months old

Only one answer per question

Questionnaire complete

Skip patterns used properly

### **Neman izinin masu gida**

#### Household consent

**“Ina kwana/ Ina wuni/ Ina yini sunana..... na zo a madadin sashin Kula da kiwon lafiya ta Karamar hukuma don in gudanar da bincike akan rigakafin yara. Bayanan da zamu tara, za a yi amfani da su don inganta rigakafin a karamar hukumar..... Gidan ka kuma ta samu shiga.Za mu so mu yi maka tamboyoyi akan gidanka da yanayin rigakafin ‘ya ‘yan ka. Zai dauke mu kamar minti 30 mu kammala. Ba tilas bace a amsa tambayoyin nan kuma duk bayanan da za a bamu zasu kasance sirri ce. Ko akwai wasu tambayoyi game da binchiken?” [IN DA TAMBAYA KO KARIN BAYANI SAI AYI.]**

“Good morning/afternoon/evening, my name is ..... I am here on behalf of the LGA health department to conduct a survey about child immunization. The information gathered will be used to improve the immunization program in ..... LGA. Your household was chosen randomly. We would like to ask you questions about the immunization status of children in your household. It will take about 30 minutes to complete. Participation is voluntary, and all information you provide will remain confidential. At this time, do you want to ask me any questions about the survey?”[ANSWER ANY QUESTIONS AND ADDRESS ANY CONCERNS.]

**“Zamu iya fara ganawan yanzu?”**

“May I begin the interview now?”

**EY,AN BADA IZINI.** ⇒ CIGABA DA GIDAN DA YA CHANCHANTA, NAN KASA.

YES, PERMISSION IS GIVEN.⇒CONTINUE TO HOUSEHOLD ELIGIBILITY BELOW.

**IN BA’A BADA IZINI BA, A TSAYAR DA GANAWAR.**⇒ RUBUTA RASHIN AMINCEWA A TAKADAR UNGUWAR A KUMA SAKE YIN AMFANI DA WANNAN TAKARDAN NEMAN BAYANI A GIDAN DA CHANCHANTA NA GABA.

IF PERMISSION IS NOT GIVEN, STOP THE INTERVIEW. ⇒RECORD REFUSAL ON THE CLUSTER TRACKING FORM AND RE-USE THIS SAME QUESTIONNAIRE FOR THE NEXT ELIGIBLE HOUSEHOLD.

### **Gidan da ya chanchanta**

#### Household eligibility

**“Akwai yaran da ke da shekara daya amma kasa da shekaru biyu da haifuwa a cikin gidan nan?”**

[YARAN DA AKA HAIFA A TSAKANIN NOWAMBA, 2012 ZUWA OCTOBER, 2013 SUNE SUKA CHAN-CHANTA.]

“Are there any children living in this household who are 1 year old but still less than 2 years old?”

[ELIGIBLE CHILDREN ARE BORN BETWEEN NOVEMBER 2012 AND OCTOBER 2013]

**EY, AKWAI YARO/YARINYA DA TA/YA CHANCHANTA.**⇒ FARA GANAWA DA TAMBAYA H1 DAKE SHAFI NA GABA.

YES, HAVE ELIGIBLE CHILD. ⇒ BEGIN THE INTERVIEW WITH QUESTION H1 ON THE NEXT PAGE.

**IN A'A NE SAI A DENA GANAWA.** ⇒ A RUBUTA GIDAN BA TA CHANCHANTA BA A TAKARDA UNGUWAR A KUMA SAKE YIN AMFANI DA WANNAN TAKARDAN NEMAN BAYANI A GIDAN DAYA CHANCHANTA NA GABA.

IF NO, THE INTERVIEW IS OVER. ⇒ RECORD HOUSEHOLD IS NOT ELIGIBLE ON CLUSTER TRACKING FORM AND RE-USE THIS SAME QUESTIONNAIRE FOR THE NEXT ELIGIBLE HOUSEHOLD.

**BAYANI A KAN MEMBOBIN GIDA/HOUSEHOLD MEMBERS INFORMATION**

**“Yanzu i na so in yi maku tambayoyi a kan membobin gidan nan.”**

“Now, I would like to ask you some questions about the members of this household.”

H1 **Mene ne sunan maigidan nan?**  
What is the name of head of household?

H2 **Mene ne sunayen duka yaranda ke cikin gidan, wanda suke da shekara daya amma kasa da shekaru biyu da haifuwa da sunan mahaifiyar su ko mai kula da su?**  
[Bincika: “Matan aure nawa ne a cikin gidan?”]  
What are the names of all the children in the household who are 1 year old but less than 2 years and the mothers/caregivers? [Probe: “How many wives are there in the household?”]  
**LIST THE CHILDREN FROM OLDEST TO YOUNGEST:**

| Lamba Number | Sunan Yaro/yarinya Child's name | Sunan mahaifiya/mai kullawa Mother/caregiver's name |
|--------------|---------------------------------|-----------------------------------------------------|
| 1            |                                 |                                                     |
| 2            |                                 |                                                     |
| 3            |                                 |                                                     |
| 4            |                                 |                                                     |
| 5            |                                 |                                                     |
| 6            |                                 |                                                     |
| 7            |                                 |                                                     |
| 8            |                                 |                                                     |
| 9            |                                 |                                                     |

H3 [In yaran da suke da shekara daya amma kasa da shekaru biyu da haifuwa sun fi daya, sai a zabi yaro/yarinya ta hanyar yar cinke. In za a yi amfani da shi, sai a duba yawan yaran da suka chanchanta a sa maki a layin gefen hagu mai calar kore. Sai a kuma sa maki a lambar tambaya dake sama mai calar kore. Nema inda al'amudi da layi suka hadu. Wanan lambar inta zata zama lambar da za a yi amfani da ita a wurin yar cinke sunayen yara da aka rubuta a H2.]  
[If there is more than one child who is 1 year old but less than 2 years, select one using the random number table. To use it, circle the total number of eligible children in the grey column on the left. Then, circle the questionnaire number in the grey row on the top. Find the box where this column and row intersect. That number will be your randomly chosen number for the children listed in H2.]

| Random Number Table                                            |   | Lanban takardan tambayoyi/ Questionnaire Number |   |   |   |   |   |   |
|----------------------------------------------------------------|---|-------------------------------------------------|---|---|---|---|---|---|
|                                                                |   | 1                                               | 2 | 3 | 4 | 5 | 6 | 7 |
| Lamban yaran da suka chanchanta<br>Number of Eligible Children | 2 | 2                                               | 1 | 1 | 2 | 1 | 2 | 2 |
|                                                                | 3 | 2                                               | 3 | 3 | 2 | 1 | 1 | 2 |
|                                                                | 4 | 4                                               | 2 | 1 | 3 | 2 | 1 | 4 |
|                                                                | 5 | 2                                               | 1 | 5 | 4 | 2 | 3 | 5 |
|                                                                | 6 | 5                                               | 1 | 6 | 3 | 2 | 4 | 6 |
|                                                                | 7 | 4                                               | 7 | 1 | 5 | 3 | 6 | 2 |
|                                                                | 8 | 1                                               | 3 | 4 | 1 | 8 | 1 | 7 |

|                                                                                                                                                                                       |  |    |   |   |   |   |   |   |    |
|---------------------------------------------------------------------------------------------------------------------------------------------------------------------------------------|--|----|---|---|---|---|---|---|----|
|                                                                                                                                                                                       |  | 9  | 9 | 5 | 8 | 4 | 7 | 2 | 7  |
|                                                                                                                                                                                       |  | 10 | 8 | 1 | 7 | 3 | 9 | 5 | 10 |
| <p><b>[A RUBUTA LAMBAR YARON DA AKA ZABA ANAN. IN YARO DAYA NE, SAI A RUBUTA 1.] _____</b></p> <p><b>[WRITE NUMBER OF THE SELECTED CHILD HERE. IF ONLY ONE CHILD, WRITE '1'.]</b></p> |  |    |   |   |   |   |   |   |    |



|     |                                                                                                                                                                                                                                                                                                                                                                                                                                                                                                                                                                                                                         |
|-----|-------------------------------------------------------------------------------------------------------------------------------------------------------------------------------------------------------------------------------------------------------------------------------------------------------------------------------------------------------------------------------------------------------------------------------------------------------------------------------------------------------------------------------------------------------------------------------------------------------------------------|
| M2  | <p><b>Ko &lt;Suna&gt; ya taba karbar alluran rigakafin cutar tarin fuka (“BCG”) a wajen saman hannun hagu ko Kafada wanda yake barin alama a haifuwa ko bayan haifuwa?</b> [<i>Bincika: “An fi karbansa da zaran an haifu”</i>]</p> <p>Has &lt;Name&gt; ever received an injection to protect against tuberculosis (“BCG”) in the left upper arm, or shoulder, which usually causes a scar? [<i>Probe: “Usually received at or soon after birth”</i>]</p> <p><input type="checkbox"/> 1. Ey <span style="float: right;">1. Yes</span><br/> <input type="checkbox"/> 2. A’a <span style="float: right;">2. No</span></p> |
| M2A | <p><b>[DUBA TABON BCG A WAJEN SAMAN HANUN HAGU.]</b><br/> <b>[CHECK FOR BCG SCAR ON LEFT UPPER OUTER ARM.]</b></p> <p><input type="checkbox"/> 1. An ga alama <span style="float: right;">1. Scar seen</span><br/> <input type="checkbox"/> 2. Ba’ a ga alama ba <span style="float: right;">2. No scar seen</span></p>                                                                                                                                                                                                                                                                                                 |
| M3  | <p><b>Ko &lt;Suna&gt; ya/ta taba karban allura a saman chinyar hagu, don kariya daga cutar shan inna, tetanus, tari ko diphtheria(“Penta” ko “DPT”)?</b></p> <p>Has &lt;Name&gt; ever received an injection in their left upper thigh to protect against tetanus, whooping cough, or diphtheria (“Penta” or “DPT”)?</p> <p><input type="checkbox"/> 1. Ey <span style="float: right;">1. Yes</span><br/> <input type="checkbox"/> 2. A’a ⇒ M4 <span style="float: right;">2.No ⇒M4</span></p>                                                                                                                           |
| M3A | <p><b>Sau nawa gaba daya aka karbi rigakafin penta/ DPT?</b><br/> How many total times was Penta/DPT vaccine received?</p> <p><b>Yawan lokaci _____</b>[A rubuta 99 in ba’a sani ba]<br/> Number of times [99=Don’t know]</p>                                                                                                                                                                                                                                                                                                                                                                                           |

|     |                                                                                                                                                                                                                                                                                                                                                                                                                                                                                                                                                                                                                       |
|-----|-----------------------------------------------------------------------------------------------------------------------------------------------------------------------------------------------------------------------------------------------------------------------------------------------------------------------------------------------------------------------------------------------------------------------------------------------------------------------------------------------------------------------------------------------------------------------------------------------------------------------|
| M4  | <p><b>Ko &lt;Suna&gt; ya taba karbar maganin digawa ta baki na (“OPV”) don kare shi daga cutar shan innaa asibiti/wurin fadakarwa?</b> [<i>Bincika</i>: “Ban da ranakun yakin fadakarwan shan inna na gida da gida.”]</p> <p>Has &lt;Name&gt;ever received drops in their mouth to protect against polio (“OPV”) at a clinic/outreach? [<i>Probe</i>: “Not during polio house-to-house campaign”]</p> <p><input type="checkbox"/> 1. Ey <span style="float: right;">1. Yes</span><br/> <input type="checkbox"/> 2. A’a ⇒M5 <span style="float: right;">2. No ⇒ M5</span></p>                                          |
| M4A | <p><b>An taba diga maganin cutar shan inna a asibiti/wurin fadakarwa a cikin mako biyu da haifuwa?</b> [<i>Bincika</i>: “Banda ranakun fadakarwan cutar shan inna na gida da gida.”]</p> <p>Were polio drops received at a clinic/outreach in the first two weeks of birth? [<i>Probe</i>: “Not during polio house-to-house campaign”]</p> <p><input type="checkbox"/> 1. Cikin mako 2 da haifuwa <span style="float: right;">1. Within 2 weeks of birth</span><br/> <input type="checkbox"/> 2. Ba’a cikin mako biyu ba/ban sani ba <span style="float: right;">2. Not within 2 weeks of birth/don’t know</span></p> |
| M4B | <p><b>Sau nawa gaba daya aka diga ma yaro/yarinya maganin cutar shan inna a asibiti?</b> [<i>Bincika</i>: “Banda ranakun fadakarwa.”]</p> <p>How many total times were polio drops received at a clinic/outreach? [<i>Probe</i>: “Not during campaign”]</p> <p><b>Sau nawa/</b> Number of times _____ [<i>Rubuta 99 in ba’a sani ba</i>]/ [99=Don’t know]</p>                                                                                                                                                                                                                                                         |
| M5  | <p><b>Ko &lt;Suna&gt;ya/ta taba karban allura a china da haifuwa ko bayan haifuwa don kariya daga ciwon hanta (“HepB”)?</b></p> <p>Has &lt;Name&gt; ever received an injection in their thigh at birth or soon after birth to protect against Hepatitis B (“HepB”)?</p> <p><input type="checkbox"/> 1. Ey <span style="float: right;">1. Yes</span><br/> <input type="checkbox"/> 2. A’a ⇒ M6 <span style="float: right;">2. No ⇒ M6</span></p>                                                                                                                                                                       |
| M5A | <p><b>Sau nawa gaba daya aka karbi rigakafin ciwon hanta?</b></p> <p>How many total times was Hepatitis B vaccine received?</p> <p><b>Yawan lokaci</b> _____ [<i>Rubuta 99 in ba’a sani ba</i>]<br/> Number of times [99=Don’t know]</p>                                                                                                                                                                                                                                                                                                                                                                              |
| M6  | <p><b>Ko &lt;Suna&gt; ya/ta taba karban allura a saman hannun hagu dayake/take wata 9 ko fiye da haka don kariya daga ciwon bakon dauro?</b> [<i>Bincika</i>: “Banda lokacin fadakarwan ciwon shawara.”]</p> <p>Has &lt;Name&gt; ever received an injection in his/her left upper arm at age 9 months or older to prevent him/her from getting measles? [<i>Probe</i>: “Not during a measles campaign”]</p> <p><input type="checkbox"/> 1. Ey <span style="float: right;">1. Yes</span><br/> <input type="checkbox"/> 2. A’a <span style="float: right;">2. No</span></p>                                             |









|                                                                                |                                                                                                                                                                                                                                                                                                                                                                                                                                                                                                                                                                                                                                                                                                                                                                                                                                                                                                                                                                                                                                                                                                                                                                                                                                                                                                                                                                                                                                                                                                                                                                                                                                                                                                                                                                                                                                                                                                                                                                                                                                                                                                                                                                                                                                                                                                                                                                                                                                                                                                                                                                                                                                                                                                                                                                                                                                                                                                                                                                                                                                                                                                                                                                                                                                                                                                                                                                                      |                                                     |                  |                                                            |                               |                                                   |                                |                                             |                  |                                    |          |                                       |               |                                                    |                         |                                            |                         |                                                                 |                                    |                                            |                    |                                                   |                   |                                                 |                      |                                                         |                             |                                                                                |                                             |                                          |                |
|--------------------------------------------------------------------------------|--------------------------------------------------------------------------------------------------------------------------------------------------------------------------------------------------------------------------------------------------------------------------------------------------------------------------------------------------------------------------------------------------------------------------------------------------------------------------------------------------------------------------------------------------------------------------------------------------------------------------------------------------------------------------------------------------------------------------------------------------------------------------------------------------------------------------------------------------------------------------------------------------------------------------------------------------------------------------------------------------------------------------------------------------------------------------------------------------------------------------------------------------------------------------------------------------------------------------------------------------------------------------------------------------------------------------------------------------------------------------------------------------------------------------------------------------------------------------------------------------------------------------------------------------------------------------------------------------------------------------------------------------------------------------------------------------------------------------------------------------------------------------------------------------------------------------------------------------------------------------------------------------------------------------------------------------------------------------------------------------------------------------------------------------------------------------------------------------------------------------------------------------------------------------------------------------------------------------------------------------------------------------------------------------------------------------------------------------------------------------------------------------------------------------------------------------------------------------------------------------------------------------------------------------------------------------------------------------------------------------------------------------------------------------------------------------------------------------------------------------------------------------------------------------------------------------------------------------------------------------------------------------------------------------------------------------------------------------------------------------------------------------------------------------------------------------------------------------------------------------------------------------------------------------------------------------------------------------------------------------------------------------------------------------------------------------------------------------------------------------------------|-----------------------------------------------------|------------------|------------------------------------------------------------|-------------------------------|---------------------------------------------------|--------------------------------|---------------------------------------------|------------------|------------------------------------|----------|---------------------------------------|---------------|----------------------------------------------------|-------------------------|--------------------------------------------|-------------------------|-----------------------------------------------------------------|------------------------------------|--------------------------------------------|--------------------|---------------------------------------------------|-------------------|-------------------------------------------------|----------------------|---------------------------------------------------------|-----------------------------|--------------------------------------------------------------------------------|---------------------------------------------|------------------------------------------|----------------|
| R3                                                                             | <p><b>A ta wace hanya aka fi samun bayani akan rigakafin yau da kullum?</b><br/>         [KADA A KARANTA AMSOSHI, A ZABI DALILI <u>MAI KWARI</u> KUDA DAYA.]</p> <p>What is your main source of information about vaccines offered through routine health services?<br/>         [DO NOT READ THE ANSWERS. CHOOSE ONE <u>MAIN</u> SOURCE BASED ON RESPONSE.]</p> <table style="width: 100%; border: none;"> <tr> <td style="width: 50%; vertical-align: top; padding: 2px;"><input type="checkbox"/> 1. Ma'aikacin kiwon lafiya</td> <td style="width: 50%; vertical-align: top; padding: 2px;">1. Health worker</td> </tr> <tr> <td style="vertical-align: top; padding: 2px;"><input type="checkbox"/> 2. Masu rigakafin ciwon shan inna</td> <td style="vertical-align: top; padding: 2px;">2. Polio campaign vaccinators</td> </tr> <tr> <td style="vertical-align: top; padding: 2px;"><input type="checkbox"/> 3. Amsa kuwa/ masu shela</td> <td style="vertical-align: top; padding: 2px;">3. Loud speaker/town announcer</td> </tr> <tr> <td style="vertical-align: top; padding: 2px;"><input type="checkbox"/> 4. Hotunan sanarwa</td> <td style="vertical-align: top; padding: 2px;">4. Poster/banner</td> </tr> <tr> <td style="vertical-align: top; padding: 2px;"><input type="checkbox"/> 5. Rediyo</td> <td style="vertical-align: top; padding: 2px;">5. Radio</td> </tr> <tr> <td style="vertical-align: top; padding: 2px;"><input type="checkbox"/> 6. Telebijin</td> <td style="vertical-align: top; padding: 2px;">6. Television</td> </tr> <tr> <td style="vertical-align: top; padding: 2px;"><input type="checkbox"/> 7. Wayar tafi da gidan ka</td> <td style="vertical-align: top; padding: 2px;">7. Mobile telephone/SMS</td> </tr> <tr> <td style="vertical-align: top; padding: 2px;"><input type="checkbox"/> 8. Jaridu/kassidu</td> <td style="vertical-align: top; padding: 2px;">8. Newspapers/magazines</td> </tr> <tr> <td style="vertical-align: top; padding: 2px;"><input type="checkbox"/> 9. Miji/yan'uwa/makwabta/abokan arziki</td> <td style="vertical-align: top; padding: 2px;">9. Husband/family/neighbor/friends</td> </tr> <tr> <td style="vertical-align: top; padding: 2px;"><input type="checkbox"/> 10. Kungiyar mata</td> <td style="vertical-align: top; padding: 2px;">10. Women's groups</td> </tr> <tr> <td style="vertical-align: top; padding: 2px;"><input type="checkbox"/> 11. Masallatai/coci-coci</td> <td style="vertical-align: top; padding: 2px;">11. Mosque/church</td> </tr> <tr> <td style="vertical-align: top; padding: 2px;"><input type="checkbox"/> 12. Shugabanin al'umma</td> <td style="vertical-align: top; padding: 2px;">12. Community leader</td> </tr> <tr> <td style="vertical-align: top; padding: 2px;"><input type="checkbox"/> 13. Ma su hada kai al'umma/VCM</td> <td style="vertical-align: top; padding: 2px;">13. Community mobilizer/VCM</td> </tr> <tr> <td style="vertical-align: top; padding: 2px;"><input type="checkbox"/> 14. Rashin jin bayanin rigakafi daga cibiyoyin lafiya</td> <td style="vertical-align: top; padding: 2px;">14. Not heard of routine vaccination before</td> </tr> <tr> <td style="vertical-align: top; padding: 2px;"><input type="checkbox"/> 15. Ban sani ba</td> <td style="vertical-align: top; padding: 2px;">15. Don't know</td> </tr> </table> | <input type="checkbox"/> 1. Ma'aikacin kiwon lafiya | 1. Health worker | <input type="checkbox"/> 2. Masu rigakafin ciwon shan inna | 2. Polio campaign vaccinators | <input type="checkbox"/> 3. Amsa kuwa/ masu shela | 3. Loud speaker/town announcer | <input type="checkbox"/> 4. Hotunan sanarwa | 4. Poster/banner | <input type="checkbox"/> 5. Rediyo | 5. Radio | <input type="checkbox"/> 6. Telebijin | 6. Television | <input type="checkbox"/> 7. Wayar tafi da gidan ka | 7. Mobile telephone/SMS | <input type="checkbox"/> 8. Jaridu/kassidu | 8. Newspapers/magazines | <input type="checkbox"/> 9. Miji/yan'uwa/makwabta/abokan arziki | 9. Husband/family/neighbor/friends | <input type="checkbox"/> 10. Kungiyar mata | 10. Women's groups | <input type="checkbox"/> 11. Masallatai/coci-coci | 11. Mosque/church | <input type="checkbox"/> 12. Shugabanin al'umma | 12. Community leader | <input type="checkbox"/> 13. Ma su hada kai al'umma/VCM | 13. Community mobilizer/VCM | <input type="checkbox"/> 14. Rashin jin bayanin rigakafi daga cibiyoyin lafiya | 14. Not heard of routine vaccination before | <input type="checkbox"/> 15. Ban sani ba | 15. Don't know |
| <input type="checkbox"/> 1. Ma'aikacin kiwon lafiya                            | 1. Health worker                                                                                                                                                                                                                                                                                                                                                                                                                                                                                                                                                                                                                                                                                                                                                                                                                                                                                                                                                                                                                                                                                                                                                                                                                                                                                                                                                                                                                                                                                                                                                                                                                                                                                                                                                                                                                                                                                                                                                                                                                                                                                                                                                                                                                                                                                                                                                                                                                                                                                                                                                                                                                                                                                                                                                                                                                                                                                                                                                                                                                                                                                                                                                                                                                                                                                                                                                                     |                                                     |                  |                                                            |                               |                                                   |                                |                                             |                  |                                    |          |                                       |               |                                                    |                         |                                            |                         |                                                                 |                                    |                                            |                    |                                                   |                   |                                                 |                      |                                                         |                             |                                                                                |                                             |                                          |                |
| <input type="checkbox"/> 2. Masu rigakafin ciwon shan inna                     | 2. Polio campaign vaccinators                                                                                                                                                                                                                                                                                                                                                                                                                                                                                                                                                                                                                                                                                                                                                                                                                                                                                                                                                                                                                                                                                                                                                                                                                                                                                                                                                                                                                                                                                                                                                                                                                                                                                                                                                                                                                                                                                                                                                                                                                                                                                                                                                                                                                                                                                                                                                                                                                                                                                                                                                                                                                                                                                                                                                                                                                                                                                                                                                                                                                                                                                                                                                                                                                                                                                                                                                        |                                                     |                  |                                                            |                               |                                                   |                                |                                             |                  |                                    |          |                                       |               |                                                    |                         |                                            |                         |                                                                 |                                    |                                            |                    |                                                   |                   |                                                 |                      |                                                         |                             |                                                                                |                                             |                                          |                |
| <input type="checkbox"/> 3. Amsa kuwa/ masu shela                              | 3. Loud speaker/town announcer                                                                                                                                                                                                                                                                                                                                                                                                                                                                                                                                                                                                                                                                                                                                                                                                                                                                                                                                                                                                                                                                                                                                                                                                                                                                                                                                                                                                                                                                                                                                                                                                                                                                                                                                                                                                                                                                                                                                                                                                                                                                                                                                                                                                                                                                                                                                                                                                                                                                                                                                                                                                                                                                                                                                                                                                                                                                                                                                                                                                                                                                                                                                                                                                                                                                                                                                                       |                                                     |                  |                                                            |                               |                                                   |                                |                                             |                  |                                    |          |                                       |               |                                                    |                         |                                            |                         |                                                                 |                                    |                                            |                    |                                                   |                   |                                                 |                      |                                                         |                             |                                                                                |                                             |                                          |                |
| <input type="checkbox"/> 4. Hotunan sanarwa                                    | 4. Poster/banner                                                                                                                                                                                                                                                                                                                                                                                                                                                                                                                                                                                                                                                                                                                                                                                                                                                                                                                                                                                                                                                                                                                                                                                                                                                                                                                                                                                                                                                                                                                                                                                                                                                                                                                                                                                                                                                                                                                                                                                                                                                                                                                                                                                                                                                                                                                                                                                                                                                                                                                                                                                                                                                                                                                                                                                                                                                                                                                                                                                                                                                                                                                                                                                                                                                                                                                                                                     |                                                     |                  |                                                            |                               |                                                   |                                |                                             |                  |                                    |          |                                       |               |                                                    |                         |                                            |                         |                                                                 |                                    |                                            |                    |                                                   |                   |                                                 |                      |                                                         |                             |                                                                                |                                             |                                          |                |
| <input type="checkbox"/> 5. Rediyo                                             | 5. Radio                                                                                                                                                                                                                                                                                                                                                                                                                                                                                                                                                                                                                                                                                                                                                                                                                                                                                                                                                                                                                                                                                                                                                                                                                                                                                                                                                                                                                                                                                                                                                                                                                                                                                                                                                                                                                                                                                                                                                                                                                                                                                                                                                                                                                                                                                                                                                                                                                                                                                                                                                                                                                                                                                                                                                                                                                                                                                                                                                                                                                                                                                                                                                                                                                                                                                                                                                                             |                                                     |                  |                                                            |                               |                                                   |                                |                                             |                  |                                    |          |                                       |               |                                                    |                         |                                            |                         |                                                                 |                                    |                                            |                    |                                                   |                   |                                                 |                      |                                                         |                             |                                                                                |                                             |                                          |                |
| <input type="checkbox"/> 6. Telebijin                                          | 6. Television                                                                                                                                                                                                                                                                                                                                                                                                                                                                                                                                                                                                                                                                                                                                                                                                                                                                                                                                                                                                                                                                                                                                                                                                                                                                                                                                                                                                                                                                                                                                                                                                                                                                                                                                                                                                                                                                                                                                                                                                                                                                                                                                                                                                                                                                                                                                                                                                                                                                                                                                                                                                                                                                                                                                                                                                                                                                                                                                                                                                                                                                                                                                                                                                                                                                                                                                                                        |                                                     |                  |                                                            |                               |                                                   |                                |                                             |                  |                                    |          |                                       |               |                                                    |                         |                                            |                         |                                                                 |                                    |                                            |                    |                                                   |                   |                                                 |                      |                                                         |                             |                                                                                |                                             |                                          |                |
| <input type="checkbox"/> 7. Wayar tafi da gidan ka                             | 7. Mobile telephone/SMS                                                                                                                                                                                                                                                                                                                                                                                                                                                                                                                                                                                                                                                                                                                                                                                                                                                                                                                                                                                                                                                                                                                                                                                                                                                                                                                                                                                                                                                                                                                                                                                                                                                                                                                                                                                                                                                                                                                                                                                                                                                                                                                                                                                                                                                                                                                                                                                                                                                                                                                                                                                                                                                                                                                                                                                                                                                                                                                                                                                                                                                                                                                                                                                                                                                                                                                                                              |                                                     |                  |                                                            |                               |                                                   |                                |                                             |                  |                                    |          |                                       |               |                                                    |                         |                                            |                         |                                                                 |                                    |                                            |                    |                                                   |                   |                                                 |                      |                                                         |                             |                                                                                |                                             |                                          |                |
| <input type="checkbox"/> 8. Jaridu/kassidu                                     | 8. Newspapers/magazines                                                                                                                                                                                                                                                                                                                                                                                                                                                                                                                                                                                                                                                                                                                                                                                                                                                                                                                                                                                                                                                                                                                                                                                                                                                                                                                                                                                                                                                                                                                                                                                                                                                                                                                                                                                                                                                                                                                                                                                                                                                                                                                                                                                                                                                                                                                                                                                                                                                                                                                                                                                                                                                                                                                                                                                                                                                                                                                                                                                                                                                                                                                                                                                                                                                                                                                                                              |                                                     |                  |                                                            |                               |                                                   |                                |                                             |                  |                                    |          |                                       |               |                                                    |                         |                                            |                         |                                                                 |                                    |                                            |                    |                                                   |                   |                                                 |                      |                                                         |                             |                                                                                |                                             |                                          |                |
| <input type="checkbox"/> 9. Miji/yan'uwa/makwabta/abokan arziki                | 9. Husband/family/neighbor/friends                                                                                                                                                                                                                                                                                                                                                                                                                                                                                                                                                                                                                                                                                                                                                                                                                                                                                                                                                                                                                                                                                                                                                                                                                                                                                                                                                                                                                                                                                                                                                                                                                                                                                                                                                                                                                                                                                                                                                                                                                                                                                                                                                                                                                                                                                                                                                                                                                                                                                                                                                                                                                                                                                                                                                                                                                                                                                                                                                                                                                                                                                                                                                                                                                                                                                                                                                   |                                                     |                  |                                                            |                               |                                                   |                                |                                             |                  |                                    |          |                                       |               |                                                    |                         |                                            |                         |                                                                 |                                    |                                            |                    |                                                   |                   |                                                 |                      |                                                         |                             |                                                                                |                                             |                                          |                |
| <input type="checkbox"/> 10. Kungiyar mata                                     | 10. Women's groups                                                                                                                                                                                                                                                                                                                                                                                                                                                                                                                                                                                                                                                                                                                                                                                                                                                                                                                                                                                                                                                                                                                                                                                                                                                                                                                                                                                                                                                                                                                                                                                                                                                                                                                                                                                                                                                                                                                                                                                                                                                                                                                                                                                                                                                                                                                                                                                                                                                                                                                                                                                                                                                                                                                                                                                                                                                                                                                                                                                                                                                                                                                                                                                                                                                                                                                                                                   |                                                     |                  |                                                            |                               |                                                   |                                |                                             |                  |                                    |          |                                       |               |                                                    |                         |                                            |                         |                                                                 |                                    |                                            |                    |                                                   |                   |                                                 |                      |                                                         |                             |                                                                                |                                             |                                          |                |
| <input type="checkbox"/> 11. Masallatai/coci-coci                              | 11. Mosque/church                                                                                                                                                                                                                                                                                                                                                                                                                                                                                                                                                                                                                                                                                                                                                                                                                                                                                                                                                                                                                                                                                                                                                                                                                                                                                                                                                                                                                                                                                                                                                                                                                                                                                                                                                                                                                                                                                                                                                                                                                                                                                                                                                                                                                                                                                                                                                                                                                                                                                                                                                                                                                                                                                                                                                                                                                                                                                                                                                                                                                                                                                                                                                                                                                                                                                                                                                                    |                                                     |                  |                                                            |                               |                                                   |                                |                                             |                  |                                    |          |                                       |               |                                                    |                         |                                            |                         |                                                                 |                                    |                                            |                    |                                                   |                   |                                                 |                      |                                                         |                             |                                                                                |                                             |                                          |                |
| <input type="checkbox"/> 12. Shugabanin al'umma                                | 12. Community leader                                                                                                                                                                                                                                                                                                                                                                                                                                                                                                                                                                                                                                                                                                                                                                                                                                                                                                                                                                                                                                                                                                                                                                                                                                                                                                                                                                                                                                                                                                                                                                                                                                                                                                                                                                                                                                                                                                                                                                                                                                                                                                                                                                                                                                                                                                                                                                                                                                                                                                                                                                                                                                                                                                                                                                                                                                                                                                                                                                                                                                                                                                                                                                                                                                                                                                                                                                 |                                                     |                  |                                                            |                               |                                                   |                                |                                             |                  |                                    |          |                                       |               |                                                    |                         |                                            |                         |                                                                 |                                    |                                            |                    |                                                   |                   |                                                 |                      |                                                         |                             |                                                                                |                                             |                                          |                |
| <input type="checkbox"/> 13. Ma su hada kai al'umma/VCM                        | 13. Community mobilizer/VCM                                                                                                                                                                                                                                                                                                                                                                                                                                                                                                                                                                                                                                                                                                                                                                                                                                                                                                                                                                                                                                                                                                                                                                                                                                                                                                                                                                                                                                                                                                                                                                                                                                                                                                                                                                                                                                                                                                                                                                                                                                                                                                                                                                                                                                                                                                                                                                                                                                                                                                                                                                                                                                                                                                                                                                                                                                                                                                                                                                                                                                                                                                                                                                                                                                                                                                                                                          |                                                     |                  |                                                            |                               |                                                   |                                |                                             |                  |                                    |          |                                       |               |                                                    |                         |                                            |                         |                                                                 |                                    |                                            |                    |                                                   |                   |                                                 |                      |                                                         |                             |                                                                                |                                             |                                          |                |
| <input type="checkbox"/> 14. Rashin jin bayanin rigakafi daga cibiyoyin lafiya | 14. Not heard of routine vaccination before                                                                                                                                                                                                                                                                                                                                                                                                                                                                                                                                                                                                                                                                                                                                                                                                                                                                                                                                                                                                                                                                                                                                                                                                                                                                                                                                                                                                                                                                                                                                                                                                                                                                                                                                                                                                                                                                                                                                                                                                                                                                                                                                                                                                                                                                                                                                                                                                                                                                                                                                                                                                                                                                                                                                                                                                                                                                                                                                                                                                                                                                                                                                                                                                                                                                                                                                          |                                                     |                  |                                                            |                               |                                                   |                                |                                             |                  |                                    |          |                                       |               |                                                    |                         |                                            |                         |                                                                 |                                    |                                            |                    |                                                   |                   |                                                 |                      |                                                         |                             |                                                                                |                                             |                                          |                |
| <input type="checkbox"/> 15. Ban sani ba                                       | 15. Don't know                                                                                                                                                                                                                                                                                                                                                                                                                                                                                                                                                                                                                                                                                                                                                                                                                                                                                                                                                                                                                                                                                                                                                                                                                                                                                                                                                                                                                                                                                                                                                                                                                                                                                                                                                                                                                                                                                                                                                                                                                                                                                                                                                                                                                                                                                                                                                                                                                                                                                                                                                                                                                                                                                                                                                                                                                                                                                                                                                                                                                                                                                                                                                                                                                                                                                                                                                                       |                                                     |                  |                                                            |                               |                                                   |                                |                                             |                  |                                    |          |                                       |               |                                                    |                         |                                            |                         |                                                                 |                                    |                                            |                    |                                                   |                   |                                                 |                      |                                                         |                             |                                                                                |                                             |                                          |                |

|                                                                                             |                                                                                                                                                                                                                                                                                                                                                                                                                                                                                                                                                                                                                                                                                                                                                                                                                                                                                                                                                                                                                                                                                                                                                                                                                                                                                                                                                                                                                                                                                                                                                                                                                                                                                                                                                                                                                                                                                                                                                                                                                                                                                                                                                                                                                                                                                                                                                                                                                                                                                                                                                                                                                                                                                                                                                                                                                                                                                                                                                                                                                              |                                               |                          |                                                             |                                |                                                                                    |                                          |                                                                   |                                           |                                                                             |                                             |                                                                                             |                                                    |                                                        |                                      |                                                         |                                       |                                                             |                                         |                                                               |                                          |                                                   |                     |
|---------------------------------------------------------------------------------------------|------------------------------------------------------------------------------------------------------------------------------------------------------------------------------------------------------------------------------------------------------------------------------------------------------------------------------------------------------------------------------------------------------------------------------------------------------------------------------------------------------------------------------------------------------------------------------------------------------------------------------------------------------------------------------------------------------------------------------------------------------------------------------------------------------------------------------------------------------------------------------------------------------------------------------------------------------------------------------------------------------------------------------------------------------------------------------------------------------------------------------------------------------------------------------------------------------------------------------------------------------------------------------------------------------------------------------------------------------------------------------------------------------------------------------------------------------------------------------------------------------------------------------------------------------------------------------------------------------------------------------------------------------------------------------------------------------------------------------------------------------------------------------------------------------------------------------------------------------------------------------------------------------------------------------------------------------------------------------------------------------------------------------------------------------------------------------------------------------------------------------------------------------------------------------------------------------------------------------------------------------------------------------------------------------------------------------------------------------------------------------------------------------------------------------------------------------------------------------------------------------------------------------------------------------------------------------------------------------------------------------------------------------------------------------------------------------------------------------------------------------------------------------------------------------------------------------------------------------------------------------------------------------------------------------------------------------------------------------------------------------------------------------|-----------------------------------------------|--------------------------|-------------------------------------------------------------|--------------------------------|------------------------------------------------------------------------------------|------------------------------------------|-------------------------------------------------------------------|-------------------------------------------|-----------------------------------------------------------------------------|---------------------------------------------|---------------------------------------------------------------------------------------------|----------------------------------------------------|--------------------------------------------------------|--------------------------------------|---------------------------------------------------------|---------------------------------------|-------------------------------------------------------------|-----------------------------------------|---------------------------------------------------------------|------------------------------------------|---------------------------------------------------|---------------------|
| R4                                                                                          | <p><b>Wace bayani ne iyaye mata za su bukata don yanke shawaran yi wa yaran su rigakafi ta hannun cibiyoyi kiwon lafiya ta yau da kullum?</b><br/>         [KAR A KARANTA AMSOSHI. ZABI BAYANI DAYA <u>MAI KWARI</u> BISA GA AMSOSHIN DA AKA SAMU.]</p> <p>What information would help mothers decide to vaccinate their children through routine immunization services? [DO NOT READ THE ANSWERS. CHOOSE ONE <u>MAIN</u> INFORMATION BASED ON THEIR RESPONSE.]</p> <table style="width: 100%; border: none;"> <tr> <td style="width: 50%; vertical-align: top; padding: 2px;"><input type="checkbox"/> 1. Ingancin rigakafi</td> <td style="width: 50%; vertical-align: top; padding: 2px;">1. Safety of the vaccine</td> </tr> <tr> <td style="vertical-align: top; padding: 2px;"><input type="checkbox"/> 2. Sakkamako mai illa na rigakafin</td> <td style="vertical-align: top; padding: 2px;">2. Side effects of the vaccine</td> </tr> <tr> <td style="vertical-align: top; padding: 2px;"><input type="checkbox"/> 3. Dalilin da yasa yi wa yaro na rigakafi ke da mahiminci</td> <td style="vertical-align: top; padding: 2px;">3. Why vaccinating my child is important</td> </tr> <tr> <td style="vertical-align: top; padding: 2px;"><input type="checkbox"/> 4. Wane cututtuka ne rigakafin ke karewa</td> <td style="vertical-align: top; padding: 2px;">4. What diseases vaccines protect against</td> </tr> <tr> <td style="vertical-align: top; padding: 2px;"><input type="checkbox"/> 5. Ko yara marasa lafiya za su iya karban rigakafi</td> <td style="vertical-align: top; padding: 2px;">5. If sick children can receive the vaccine</td> </tr> <tr> <td style="vertical-align: top; padding: 2px;"><input type="checkbox"/> 6. Lokacin/wurin yin rigakafin yau da kullum yayi kusa da gida na.</td> <td style="vertical-align: top; padding: 2px;">6. Time/place for routine vaccination near my home</td> </tr> <tr> <td style="vertical-align: top; padding: 2px;"><input type="checkbox"/> 7. Tsarin yi wa yaro rigakafi</td> <td style="vertical-align: top; padding: 2px;">7. Schedule for vaccination of child</td> </tr> <tr> <td style="vertical-align: top; padding: 2px;"><input type="checkbox"/> 8. Ko maigida/iyali sun amince</td> <td style="vertical-align: top; padding: 2px;">8. Whether my husband/family approves</td> </tr> <tr> <td style="vertical-align: top; padding: 2px;"><input type="checkbox"/> 9. Ko shugaban addini na ya amince</td> <td style="vertical-align: top; padding: 2px;">9. Whether my religious leader approves</td> </tr> <tr> <td style="vertical-align: top; padding: 2px;"><input type="checkbox"/> 10. Ko shugaban al'umma ta ya amince</td> <td style="vertical-align: top; padding: 2px;">10. Whether my community leader approves</td> </tr> <tr> <td style="vertical-align: top; padding: 2px;"><input type="checkbox"/> 11. Saura, ambata: _____</td> <td style="vertical-align: top; padding: 2px;">11. Other, specify:</td> </tr> </table> | <input type="checkbox"/> 1. Ingancin rigakafi | 1. Safety of the vaccine | <input type="checkbox"/> 2. Sakkamako mai illa na rigakafin | 2. Side effects of the vaccine | <input type="checkbox"/> 3. Dalilin da yasa yi wa yaro na rigakafi ke da mahiminci | 3. Why vaccinating my child is important | <input type="checkbox"/> 4. Wane cututtuka ne rigakafin ke karewa | 4. What diseases vaccines protect against | <input type="checkbox"/> 5. Ko yara marasa lafiya za su iya karban rigakafi | 5. If sick children can receive the vaccine | <input type="checkbox"/> 6. Lokacin/wurin yin rigakafin yau da kullum yayi kusa da gida na. | 6. Time/place for routine vaccination near my home | <input type="checkbox"/> 7. Tsarin yi wa yaro rigakafi | 7. Schedule for vaccination of child | <input type="checkbox"/> 8. Ko maigida/iyali sun amince | 8. Whether my husband/family approves | <input type="checkbox"/> 9. Ko shugaban addini na ya amince | 9. Whether my religious leader approves | <input type="checkbox"/> 10. Ko shugaban al'umma ta ya amince | 10. Whether my community leader approves | <input type="checkbox"/> 11. Saura, ambata: _____ | 11. Other, specify: |
| <input type="checkbox"/> 1. Ingancin rigakafi                                               | 1. Safety of the vaccine                                                                                                                                                                                                                                                                                                                                                                                                                                                                                                                                                                                                                                                                                                                                                                                                                                                                                                                                                                                                                                                                                                                                                                                                                                                                                                                                                                                                                                                                                                                                                                                                                                                                                                                                                                                                                                                                                                                                                                                                                                                                                                                                                                                                                                                                                                                                                                                                                                                                                                                                                                                                                                                                                                                                                                                                                                                                                                                                                                                                     |                                               |                          |                                                             |                                |                                                                                    |                                          |                                                                   |                                           |                                                                             |                                             |                                                                                             |                                                    |                                                        |                                      |                                                         |                                       |                                                             |                                         |                                                               |                                          |                                                   |                     |
| <input type="checkbox"/> 2. Sakkamako mai illa na rigakafin                                 | 2. Side effects of the vaccine                                                                                                                                                                                                                                                                                                                                                                                                                                                                                                                                                                                                                                                                                                                                                                                                                                                                                                                                                                                                                                                                                                                                                                                                                                                                                                                                                                                                                                                                                                                                                                                                                                                                                                                                                                                                                                                                                                                                                                                                                                                                                                                                                                                                                                                                                                                                                                                                                                                                                                                                                                                                                                                                                                                                                                                                                                                                                                                                                                                               |                                               |                          |                                                             |                                |                                                                                    |                                          |                                                                   |                                           |                                                                             |                                             |                                                                                             |                                                    |                                                        |                                      |                                                         |                                       |                                                             |                                         |                                                               |                                          |                                                   |                     |
| <input type="checkbox"/> 3. Dalilin da yasa yi wa yaro na rigakafi ke da mahiminci          | 3. Why vaccinating my child is important                                                                                                                                                                                                                                                                                                                                                                                                                                                                                                                                                                                                                                                                                                                                                                                                                                                                                                                                                                                                                                                                                                                                                                                                                                                                                                                                                                                                                                                                                                                                                                                                                                                                                                                                                                                                                                                                                                                                                                                                                                                                                                                                                                                                                                                                                                                                                                                                                                                                                                                                                                                                                                                                                                                                                                                                                                                                                                                                                                                     |                                               |                          |                                                             |                                |                                                                                    |                                          |                                                                   |                                           |                                                                             |                                             |                                                                                             |                                                    |                                                        |                                      |                                                         |                                       |                                                             |                                         |                                                               |                                          |                                                   |                     |
| <input type="checkbox"/> 4. Wane cututtuka ne rigakafin ke karewa                           | 4. What diseases vaccines protect against                                                                                                                                                                                                                                                                                                                                                                                                                                                                                                                                                                                                                                                                                                                                                                                                                                                                                                                                                                                                                                                                                                                                                                                                                                                                                                                                                                                                                                                                                                                                                                                                                                                                                                                                                                                                                                                                                                                                                                                                                                                                                                                                                                                                                                                                                                                                                                                                                                                                                                                                                                                                                                                                                                                                                                                                                                                                                                                                                                                    |                                               |                          |                                                             |                                |                                                                                    |                                          |                                                                   |                                           |                                                                             |                                             |                                                                                             |                                                    |                                                        |                                      |                                                         |                                       |                                                             |                                         |                                                               |                                          |                                                   |                     |
| <input type="checkbox"/> 5. Ko yara marasa lafiya za su iya karban rigakafi                 | 5. If sick children can receive the vaccine                                                                                                                                                                                                                                                                                                                                                                                                                                                                                                                                                                                                                                                                                                                                                                                                                                                                                                                                                                                                                                                                                                                                                                                                                                                                                                                                                                                                                                                                                                                                                                                                                                                                                                                                                                                                                                                                                                                                                                                                                                                                                                                                                                                                                                                                                                                                                                                                                                                                                                                                                                                                                                                                                                                                                                                                                                                                                                                                                                                  |                                               |                          |                                                             |                                |                                                                                    |                                          |                                                                   |                                           |                                                                             |                                             |                                                                                             |                                                    |                                                        |                                      |                                                         |                                       |                                                             |                                         |                                                               |                                          |                                                   |                     |
| <input type="checkbox"/> 6. Lokacin/wurin yin rigakafin yau da kullum yayi kusa da gida na. | 6. Time/place for routine vaccination near my home                                                                                                                                                                                                                                                                                                                                                                                                                                                                                                                                                                                                                                                                                                                                                                                                                                                                                                                                                                                                                                                                                                                                                                                                                                                                                                                                                                                                                                                                                                                                                                                                                                                                                                                                                                                                                                                                                                                                                                                                                                                                                                                                                                                                                                                                                                                                                                                                                                                                                                                                                                                                                                                                                                                                                                                                                                                                                                                                                                           |                                               |                          |                                                             |                                |                                                                                    |                                          |                                                                   |                                           |                                                                             |                                             |                                                                                             |                                                    |                                                        |                                      |                                                         |                                       |                                                             |                                         |                                                               |                                          |                                                   |                     |
| <input type="checkbox"/> 7. Tsarin yi wa yaro rigakafi                                      | 7. Schedule for vaccination of child                                                                                                                                                                                                                                                                                                                                                                                                                                                                                                                                                                                                                                                                                                                                                                                                                                                                                                                                                                                                                                                                                                                                                                                                                                                                                                                                                                                                                                                                                                                                                                                                                                                                                                                                                                                                                                                                                                                                                                                                                                                                                                                                                                                                                                                                                                                                                                                                                                                                                                                                                                                                                                                                                                                                                                                                                                                                                                                                                                                         |                                               |                          |                                                             |                                |                                                                                    |                                          |                                                                   |                                           |                                                                             |                                             |                                                                                             |                                                    |                                                        |                                      |                                                         |                                       |                                                             |                                         |                                                               |                                          |                                                   |                     |
| <input type="checkbox"/> 8. Ko maigida/iyali sun amince                                     | 8. Whether my husband/family approves                                                                                                                                                                                                                                                                                                                                                                                                                                                                                                                                                                                                                                                                                                                                                                                                                                                                                                                                                                                                                                                                                                                                                                                                                                                                                                                                                                                                                                                                                                                                                                                                                                                                                                                                                                                                                                                                                                                                                                                                                                                                                                                                                                                                                                                                                                                                                                                                                                                                                                                                                                                                                                                                                                                                                                                                                                                                                                                                                                                        |                                               |                          |                                                             |                                |                                                                                    |                                          |                                                                   |                                           |                                                                             |                                             |                                                                                             |                                                    |                                                        |                                      |                                                         |                                       |                                                             |                                         |                                                               |                                          |                                                   |                     |
| <input type="checkbox"/> 9. Ko shugaban addini na ya amince                                 | 9. Whether my religious leader approves                                                                                                                                                                                                                                                                                                                                                                                                                                                                                                                                                                                                                                                                                                                                                                                                                                                                                                                                                                                                                                                                                                                                                                                                                                                                                                                                                                                                                                                                                                                                                                                                                                                                                                                                                                                                                                                                                                                                                                                                                                                                                                                                                                                                                                                                                                                                                                                                                                                                                                                                                                                                                                                                                                                                                                                                                                                                                                                                                                                      |                                               |                          |                                                             |                                |                                                                                    |                                          |                                                                   |                                           |                                                                             |                                             |                                                                                             |                                                    |                                                        |                                      |                                                         |                                       |                                                             |                                         |                                                               |                                          |                                                   |                     |
| <input type="checkbox"/> 10. Ko shugaban al'umma ta ya amince                               | 10. Whether my community leader approves                                                                                                                                                                                                                                                                                                                                                                                                                                                                                                                                                                                                                                                                                                                                                                                                                                                                                                                                                                                                                                                                                                                                                                                                                                                                                                                                                                                                                                                                                                                                                                                                                                                                                                                                                                                                                                                                                                                                                                                                                                                                                                                                                                                                                                                                                                                                                                                                                                                                                                                                                                                                                                                                                                                                                                                                                                                                                                                                                                                     |                                               |                          |                                                             |                                |                                                                                    |                                          |                                                                   |                                           |                                                                             |                                             |                                                                                             |                                                    |                                                        |                                      |                                                         |                                       |                                                             |                                         |                                                               |                                          |                                                   |                     |
| <input type="checkbox"/> 11. Saura, ambata: _____                                           | 11. Other, specify:                                                                                                                                                                                                                                                                                                                                                                                                                                                                                                                                                                                                                                                                                                                                                                                                                                                                                                                                                                                                                                                                                                                                                                                                                                                                                                                                                                                                                                                                                                                                                                                                                                                                                                                                                                                                                                                                                                                                                                                                                                                                                                                                                                                                                                                                                                                                                                                                                                                                                                                                                                                                                                                                                                                                                                                                                                                                                                                                                                                                          |                                               |                          |                                                             |                                |                                                                                    |                                          |                                                                   |                                           |                                                                             |                                             |                                                                                             |                                                    |                                                        |                                      |                                                         |                                       |                                                             |                                         |                                                               |                                          |                                                   |                     |



**JERIN AMSOSHI NA TAMBAYA P1A DA P2A / RESPONSE LIST for QUESTIONS P1A and P2A**

|                                                                                                |                                                                                        |
|------------------------------------------------------------------------------------------------|----------------------------------------------------------------------------------------|
| 1. Kungiyar basu zo gida ba                                                                    | 1. House not visited by team                                                           |
| 2. Yaro ba shi nan                                                                             | 2. Child absent                                                                        |
| 3. Rashin ingancin magani/tsoron sakkamako mai illa                                            | 3. Vaccine safety/fear of adverse event                                                |
| 4. Zaton ba'a bukata                                                                           | 4. No felt need                                                                        |
| 5. Dalilin Al'ada/addini                                                                       | 5. Religious/cultural reasons                                                          |
| 6. Dalilan siyasa da yanayin mulki                                                             | 6. Political reasons                                                                   |
| 7. Raci akan rigakafin                                                                         | 7. Too many rounds                                                                     |
| 8. Rashin kula da sauran cututtuka                                                             | 8. Other unmet health needs                                                            |
| 9. Mahaifiya ta ki kuma ba dalili                                                              | 9. Mother refused, no reason given                                                     |
| 10. Miji/Maigida ya ki                                                                         | 10. Husband/head of household refused                                                  |
| 11. Ma'aikata ba su zo gida ba                                                                 | 11. Vaccinator did not visit house                                                     |
| 12. Yaro ba lafiya                                                                             | 12. Child sick                                                                         |
| 13. Mahaifiya/mai kullawa bata bada izini ba                                                   | 13. No mother/caregiver consent given                                                  |
| 14. Ba'a ji dadin ma'aikata ba                                                                 | 14. Unhappy with team                                                                  |
| 15. An daga sai wane lokaci                                                                    | 15. Postponed until another time                                                       |
| 16. Ba'a san ana fadakarwa ba                                                                  | 16. Not aware of campaign                                                              |
| 17. Rigakafin lokacin fadakarwa bai kai wadda aka bada wurin cibiyoyin kiwon lafiya inganci ba | 17. Campaign vaccine is not as good as vaccine offered through routine health services |
| 18. Ban sani ba                                                                                | 18. Don't know                                                                         |
| 19. Saura                                                                                      | 19. Other                                                                              |

|                                                                                    |                                                                                                                                                                                                                                                                                                                                                                                                                                                                                                                                                                                                                                                                                                                                                                                                                                                                                                                                                                                                                                                                                                                                                                                                                                                                                                                                                                                                                                                                                                                                                                                                                                                                                                                                                                                                                                                                                                                                                                                         |                                                      |                  |                                                                 |                               |                                                  |                                |                                             |                  |                                    |          |                                      |               |                                                                    |                         |                                             |                         |                                                          |                                    |                                            |                    |                                                 |                   |                                                        |                             |                                                                                    |                                  |                                          |                |                                                   |                    |
|------------------------------------------------------------------------------------|-----------------------------------------------------------------------------------------------------------------------------------------------------------------------------------------------------------------------------------------------------------------------------------------------------------------------------------------------------------------------------------------------------------------------------------------------------------------------------------------------------------------------------------------------------------------------------------------------------------------------------------------------------------------------------------------------------------------------------------------------------------------------------------------------------------------------------------------------------------------------------------------------------------------------------------------------------------------------------------------------------------------------------------------------------------------------------------------------------------------------------------------------------------------------------------------------------------------------------------------------------------------------------------------------------------------------------------------------------------------------------------------------------------------------------------------------------------------------------------------------------------------------------------------------------------------------------------------------------------------------------------------------------------------------------------------------------------------------------------------------------------------------------------------------------------------------------------------------------------------------------------------------------------------------------------------------------------------------------------------|------------------------------------------------------|------------------|-----------------------------------------------------------------|-------------------------------|--------------------------------------------------|--------------------------------|---------------------------------------------|------------------|------------------------------------|----------|--------------------------------------|---------------|--------------------------------------------------------------------|-------------------------|---------------------------------------------|-------------------------|----------------------------------------------------------|------------------------------------|--------------------------------------------|--------------------|-------------------------------------------------|-------------------|--------------------------------------------------------|-----------------------------|------------------------------------------------------------------------------------|----------------------------------|------------------------------------------|----------------|---------------------------------------------------|--------------------|
| P3                                                                                 | <p><b>Ta wace hanya kake/kike samun bayani akan fadakarwa cutar shan inna?</b><br/>         [KA DA A KARANTA AMSOSHI A ZABI DALILI DAYA <u>MAI KWARI</u> BISA GA BAYANI DA AKA SAMU.]</p> <p>Which is your main source of information about polio campaigns?<br/>         [DO NOT READ THE ANSWERS. CHOOSE ONE <u>MAIN</u> REASON BASED ON RESPONSE.]</p> <table border="0"> <tr> <td><input type="checkbox"/> 1. Ma'aikachin kiwon lafiya</td> <td>1. Health worker</td> </tr> <tr> <td><input type="checkbox"/> 2. Masu bada rigakafin cutar shan inna</td> <td>2. Polio campaign vaccinators</td> </tr> <tr> <td><input type="checkbox"/> 3. Ammsakuwa/masu shela</td> <td>3. Loud speaker/town announcer</td> </tr> <tr> <td><input type="checkbox"/> 4. Hotunan sanarwa</td> <td>4. Poster/banner</td> </tr> <tr> <td><input type="checkbox"/> 5. Rediyo</td> <td>5. Radio</td> </tr> <tr> <td><input type="checkbox"/> 6. Tebijiin</td> <td>6. Television</td> </tr> <tr> <td><input type="checkbox"/> 7. Wayar tafi da gidan ka/ gajeruwan sako</td> <td>7. Mobile telephone/SMS</td> </tr> <tr> <td><input type="checkbox"/> 8. Jaridu/ kassidu</td> <td>8. Newspapers/magazines</td> </tr> <tr> <td><input type="checkbox"/> 9. Miji/yan'uwa/Makwabta/Abokai</td> <td>9. Husband/family/neighbor/friends</td> </tr> <tr> <td><input type="checkbox"/> 10. Kungiyar mata</td> <td>10. Women's groups</td> </tr> <tr> <td><input type="checkbox"/> 11. Massallaci da coci</td> <td>11. Mosque/church</td> </tr> <tr> <td><input type="checkbox"/> 12. Masu hada kan al'umma/VCM</td> <td>12. Community mobilizer/VCM</td> </tr> <tr> <td><input type="checkbox"/> 13. Ban taba jin labarin rigakafin ta wurin ma'aikatan ba</td> <td>13. Not heard of polio campaigns</td> </tr> <tr> <td><input type="checkbox"/> 14. Ban sani ba</td> <td>14. Don't know</td> </tr> <tr> <td><input type="checkbox"/> 15. Saura, ambata: _____</td> <td>15. Other, specify</td> </tr> </table> | <input type="checkbox"/> 1. Ma'aikachin kiwon lafiya | 1. Health worker | <input type="checkbox"/> 2. Masu bada rigakafin cutar shan inna | 2. Polio campaign vaccinators | <input type="checkbox"/> 3. Ammsakuwa/masu shela | 3. Loud speaker/town announcer | <input type="checkbox"/> 4. Hotunan sanarwa | 4. Poster/banner | <input type="checkbox"/> 5. Rediyo | 5. Radio | <input type="checkbox"/> 6. Tebijiin | 6. Television | <input type="checkbox"/> 7. Wayar tafi da gidan ka/ gajeruwan sako | 7. Mobile telephone/SMS | <input type="checkbox"/> 8. Jaridu/ kassidu | 8. Newspapers/magazines | <input type="checkbox"/> 9. Miji/yan'uwa/Makwabta/Abokai | 9. Husband/family/neighbor/friends | <input type="checkbox"/> 10. Kungiyar mata | 10. Women's groups | <input type="checkbox"/> 11. Massallaci da coci | 11. Mosque/church | <input type="checkbox"/> 12. Masu hada kan al'umma/VCM | 12. Community mobilizer/VCM | <input type="checkbox"/> 13. Ban taba jin labarin rigakafin ta wurin ma'aikatan ba | 13. Not heard of polio campaigns | <input type="checkbox"/> 14. Ban sani ba | 14. Don't know | <input type="checkbox"/> 15. Saura, ambata: _____ | 15. Other, specify |
| <input type="checkbox"/> 1. Ma'aikachin kiwon lafiya                               | 1. Health worker                                                                                                                                                                                                                                                                                                                                                                                                                                                                                                                                                                                                                                                                                                                                                                                                                                                                                                                                                                                                                                                                                                                                                                                                                                                                                                                                                                                                                                                                                                                                                                                                                                                                                                                                                                                                                                                                                                                                                                        |                                                      |                  |                                                                 |                               |                                                  |                                |                                             |                  |                                    |          |                                      |               |                                                                    |                         |                                             |                         |                                                          |                                    |                                            |                    |                                                 |                   |                                                        |                             |                                                                                    |                                  |                                          |                |                                                   |                    |
| <input type="checkbox"/> 2. Masu bada rigakafin cutar shan inna                    | 2. Polio campaign vaccinators                                                                                                                                                                                                                                                                                                                                                                                                                                                                                                                                                                                                                                                                                                                                                                                                                                                                                                                                                                                                                                                                                                                                                                                                                                                                                                                                                                                                                                                                                                                                                                                                                                                                                                                                                                                                                                                                                                                                                           |                                                      |                  |                                                                 |                               |                                                  |                                |                                             |                  |                                    |          |                                      |               |                                                                    |                         |                                             |                         |                                                          |                                    |                                            |                    |                                                 |                   |                                                        |                             |                                                                                    |                                  |                                          |                |                                                   |                    |
| <input type="checkbox"/> 3. Ammsakuwa/masu shela                                   | 3. Loud speaker/town announcer                                                                                                                                                                                                                                                                                                                                                                                                                                                                                                                                                                                                                                                                                                                                                                                                                                                                                                                                                                                                                                                                                                                                                                                                                                                                                                                                                                                                                                                                                                                                                                                                                                                                                                                                                                                                                                                                                                                                                          |                                                      |                  |                                                                 |                               |                                                  |                                |                                             |                  |                                    |          |                                      |               |                                                                    |                         |                                             |                         |                                                          |                                    |                                            |                    |                                                 |                   |                                                        |                             |                                                                                    |                                  |                                          |                |                                                   |                    |
| <input type="checkbox"/> 4. Hotunan sanarwa                                        | 4. Poster/banner                                                                                                                                                                                                                                                                                                                                                                                                                                                                                                                                                                                                                                                                                                                                                                                                                                                                                                                                                                                                                                                                                                                                                                                                                                                                                                                                                                                                                                                                                                                                                                                                                                                                                                                                                                                                                                                                                                                                                                        |                                                      |                  |                                                                 |                               |                                                  |                                |                                             |                  |                                    |          |                                      |               |                                                                    |                         |                                             |                         |                                                          |                                    |                                            |                    |                                                 |                   |                                                        |                             |                                                                                    |                                  |                                          |                |                                                   |                    |
| <input type="checkbox"/> 5. Rediyo                                                 | 5. Radio                                                                                                                                                                                                                                                                                                                                                                                                                                                                                                                                                                                                                                                                                                                                                                                                                                                                                                                                                                                                                                                                                                                                                                                                                                                                                                                                                                                                                                                                                                                                                                                                                                                                                                                                                                                                                                                                                                                                                                                |                                                      |                  |                                                                 |                               |                                                  |                                |                                             |                  |                                    |          |                                      |               |                                                                    |                         |                                             |                         |                                                          |                                    |                                            |                    |                                                 |                   |                                                        |                             |                                                                                    |                                  |                                          |                |                                                   |                    |
| <input type="checkbox"/> 6. Tebijiin                                               | 6. Television                                                                                                                                                                                                                                                                                                                                                                                                                                                                                                                                                                                                                                                                                                                                                                                                                                                                                                                                                                                                                                                                                                                                                                                                                                                                                                                                                                                                                                                                                                                                                                                                                                                                                                                                                                                                                                                                                                                                                                           |                                                      |                  |                                                                 |                               |                                                  |                                |                                             |                  |                                    |          |                                      |               |                                                                    |                         |                                             |                         |                                                          |                                    |                                            |                    |                                                 |                   |                                                        |                             |                                                                                    |                                  |                                          |                |                                                   |                    |
| <input type="checkbox"/> 7. Wayar tafi da gidan ka/ gajeruwan sako                 | 7. Mobile telephone/SMS                                                                                                                                                                                                                                                                                                                                                                                                                                                                                                                                                                                                                                                                                                                                                                                                                                                                                                                                                                                                                                                                                                                                                                                                                                                                                                                                                                                                                                                                                                                                                                                                                                                                                                                                                                                                                                                                                                                                                                 |                                                      |                  |                                                                 |                               |                                                  |                                |                                             |                  |                                    |          |                                      |               |                                                                    |                         |                                             |                         |                                                          |                                    |                                            |                    |                                                 |                   |                                                        |                             |                                                                                    |                                  |                                          |                |                                                   |                    |
| <input type="checkbox"/> 8. Jaridu/ kassidu                                        | 8. Newspapers/magazines                                                                                                                                                                                                                                                                                                                                                                                                                                                                                                                                                                                                                                                                                                                                                                                                                                                                                                                                                                                                                                                                                                                                                                                                                                                                                                                                                                                                                                                                                                                                                                                                                                                                                                                                                                                                                                                                                                                                                                 |                                                      |                  |                                                                 |                               |                                                  |                                |                                             |                  |                                    |          |                                      |               |                                                                    |                         |                                             |                         |                                                          |                                    |                                            |                    |                                                 |                   |                                                        |                             |                                                                                    |                                  |                                          |                |                                                   |                    |
| <input type="checkbox"/> 9. Miji/yan'uwa/Makwabta/Abokai                           | 9. Husband/family/neighbor/friends                                                                                                                                                                                                                                                                                                                                                                                                                                                                                                                                                                                                                                                                                                                                                                                                                                                                                                                                                                                                                                                                                                                                                                                                                                                                                                                                                                                                                                                                                                                                                                                                                                                                                                                                                                                                                                                                                                                                                      |                                                      |                  |                                                                 |                               |                                                  |                                |                                             |                  |                                    |          |                                      |               |                                                                    |                         |                                             |                         |                                                          |                                    |                                            |                    |                                                 |                   |                                                        |                             |                                                                                    |                                  |                                          |                |                                                   |                    |
| <input type="checkbox"/> 10. Kungiyar mata                                         | 10. Women's groups                                                                                                                                                                                                                                                                                                                                                                                                                                                                                                                                                                                                                                                                                                                                                                                                                                                                                                                                                                                                                                                                                                                                                                                                                                                                                                                                                                                                                                                                                                                                                                                                                                                                                                                                                                                                                                                                                                                                                                      |                                                      |                  |                                                                 |                               |                                                  |                                |                                             |                  |                                    |          |                                      |               |                                                                    |                         |                                             |                         |                                                          |                                    |                                            |                    |                                                 |                   |                                                        |                             |                                                                                    |                                  |                                          |                |                                                   |                    |
| <input type="checkbox"/> 11. Massallaci da coci                                    | 11. Mosque/church                                                                                                                                                                                                                                                                                                                                                                                                                                                                                                                                                                                                                                                                                                                                                                                                                                                                                                                                                                                                                                                                                                                                                                                                                                                                                                                                                                                                                                                                                                                                                                                                                                                                                                                                                                                                                                                                                                                                                                       |                                                      |                  |                                                                 |                               |                                                  |                                |                                             |                  |                                    |          |                                      |               |                                                                    |                         |                                             |                         |                                                          |                                    |                                            |                    |                                                 |                   |                                                        |                             |                                                                                    |                                  |                                          |                |                                                   |                    |
| <input type="checkbox"/> 12. Masu hada kan al'umma/VCM                             | 12. Community mobilizer/VCM                                                                                                                                                                                                                                                                                                                                                                                                                                                                                                                                                                                                                                                                                                                                                                                                                                                                                                                                                                                                                                                                                                                                                                                                                                                                                                                                                                                                                                                                                                                                                                                                                                                                                                                                                                                                                                                                                                                                                             |                                                      |                  |                                                                 |                               |                                                  |                                |                                             |                  |                                    |          |                                      |               |                                                                    |                         |                                             |                         |                                                          |                                    |                                            |                    |                                                 |                   |                                                        |                             |                                                                                    |                                  |                                          |                |                                                   |                    |
| <input type="checkbox"/> 13. Ban taba jin labarin rigakafin ta wurin ma'aikatan ba | 13. Not heard of polio campaigns                                                                                                                                                                                                                                                                                                                                                                                                                                                                                                                                                                                                                                                                                                                                                                                                                                                                                                                                                                                                                                                                                                                                                                                                                                                                                                                                                                                                                                                                                                                                                                                                                                                                                                                                                                                                                                                                                                                                                        |                                                      |                  |                                                                 |                               |                                                  |                                |                                             |                  |                                    |          |                                      |               |                                                                    |                         |                                             |                         |                                                          |                                    |                                            |                    |                                                 |                   |                                                        |                             |                                                                                    |                                  |                                          |                |                                                   |                    |
| <input type="checkbox"/> 14. Ban sani ba                                           | 14. Don't know                                                                                                                                                                                                                                                                                                                                                                                                                                                                                                                                                                                                                                                                                                                                                                                                                                                                                                                                                                                                                                                                                                                                                                                                                                                                                                                                                                                                                                                                                                                                                                                                                                                                                                                                                                                                                                                                                                                                                                          |                                                      |                  |                                                                 |                               |                                                  |                                |                                             |                  |                                    |          |                                      |               |                                                                    |                         |                                             |                         |                                                          |                                    |                                            |                    |                                                 |                   |                                                        |                             |                                                                                    |                                  |                                          |                |                                                   |                    |
| <input type="checkbox"/> 15. Saura, ambata: _____                                  | 15. Other, specify                                                                                                                                                                                                                                                                                                                                                                                                                                                                                                                                                                                                                                                                                                                                                                                                                                                                                                                                                                                                                                                                                                                                                                                                                                                                                                                                                                                                                                                                                                                                                                                                                                                                                                                                                                                                                                                                                                                                                                      |                                                      |                  |                                                                 |                               |                                                  |                                |                                             |                  |                                    |          |                                      |               |                                                                    |                         |                                             |                         |                                                          |                                    |                                            |                    |                                                 |                   |                                                        |                             |                                                                                    |                                  |                                          |                |                                                   |                    |

**BAYANI GAME DA MAHAIFIYA/ MOTHER'S INFORMATION**

**“Yanzu zan soin tambaye ka dan tarihin(mahaifiya /mai kullawa).”**

“Now, I would like to ask you some questions about your (or the mother's/caregiver's) background.”

|    |                                                                                                                                                                                                                                                                                                                                                                                                                                          |                                                                                                            |
|----|------------------------------------------------------------------------------------------------------------------------------------------------------------------------------------------------------------------------------------------------------------------------------------------------------------------------------------------------------------------------------------------------------------------------------------------|------------------------------------------------------------------------------------------------------------|
| B1 | <b>Ya'ya nawa kike (ko maihaifiya/ mai kullawa) da shi a yanzu?</b><br>How many children do you (or does the mother/caregiver) have currently?                                                                                                                                                                                                                                                                                           | <b>Lamba _____</b><br>Number                                                                               |
| B2 | <b>Wane matakin illimin ne kika kai (maihaifiya/mai kullawa)?</b><br>What is the highest level of schooling you (or the mother/caregiver) achieved?<br><br><input type="checkbox"/> 1. Babu ilimi<br><input type="checkbox"/> 2. Ilimin firamare (Wane mataki)<br><input type="checkbox"/> 3. Ilimin sakandare (Wane mataki)<br><input type="checkbox"/> 4. Ilimin gaba da sakandari<br><input type="checkbox"/> 5. Makarantan Islamiyya | 1. None<br>2. Primary (any amount)<br>3. Secondary (any amount)<br>4. Post-secondary<br>5. Quranic schools |
| B3 | <b>Wane matakin makaranta mai gida ya kure?</b><br>What is the highest level of schooling the head of household achieved?<br><br><input type="checkbox"/> 1. Babu<br><input type="checkbox"/> 2. Ilimin firamare (Wane mataki)<br><input type="checkbox"/> 3. Ilimin sakandare (Wane mataki)<br><input type="checkbox"/> 4. Ilimin gaba da sakandari<br><input type="checkbox"/> 5. Makarantan Islamiyya                                 | 1. None<br>2. Primary (any amount)<br>3. Secondary (any amount)<br>4. Post-secondary<br>5. Quranic schools |

**[A DUBA TAKARDAR NEMAN BAYANI, KO AN AMSA DUKA TAMBOYOYI, SAI A KALMALA GANAWAR DA GODE WA MAIHAIFIYA / MAI KULLAWA SABO DA HADIN KAI DA SUKA BAYAR.]**

[CHECK THE QUESTIONNAIRE FOR COMPLETION OF ALL QUESTIONS.

THEN, END THE INTERVIEW AND THANK THE MOTHER/CAREGIVER FOR PARTICIPATING.]
