# Supplementary material for: Routine Vaccination Coverage in Northern Nigeria: Results from 40 District-Level Cluster Surveys, 2014-2015
Source: PubMed Central journal article supplement (PMC5148043; doi:10.1371/journal.pone.0167835), 2016-12-09
Supplement: pone.0167835.s002.pdf [file pone.0167835.s002.pdf]

Table 1: BCG Coverage per LGA, Nigeria 2014. Immunization Coverage Survey<sup>1,2</sup>

| S/No | State   | Lga          | Sample Size | Cluster | Average No. of respondents/cluster | Coverage Estimate (%) | Lower 95% CI | Upper 95% CI | Design Effect | ICC  |
|------|---------|--------------|-------------|---------|------------------------------------|-----------------------|--------------|--------------|---------------|------|
| 1    | Sokoto  | Illela       | 195         | 30      | 6.5                                | 14                    | 8            | 23           | 2.1           | 0.20 |
| 2    | Sokoto  | Wurno        | 210         | 30      | 7.0                                | 26                    | 16           | 36           | 2.5           | 0.26 |
| 3    | Sokoto  | Rabah        | 210         | 30      | 7.0                                | 11                    | 7            | 17           | 1.2           | 0.03 |
| 4    | Sokoto  | Kware        | 201         | 30      | 6.7                                | 12                    | 7            | 22           | 2.5           | 0.27 |
| 5    | Sokoto  | Shagari      | 206         | 30      | 6.9                                | 10                    | 5            | 19           | 2.3           | 0.22 |
| 6    | Sokoto  | Wamako       | 203         | 30      | 6.8                                | 28                    | 16           | 39           | 3.4           | 0.41 |
| 7    | Katsina | Batagarawa   | 207         | 30      | 6.9                                | 33                    | 21           | 46           | 3.3           | 0.39 |
| 8    | Katsina | Mashi        | 202         | 30      | 6.7                                | 35                    | 27           | 43           | 1.5           | 0.08 |
| 9    | Katsina | Batsari      | 192         | 28      | 6.9                                | 41                    | 30           | 52           | 2.4           | 0.24 |
| 10   | Katsina | Malumfashi   | 193         | 30      | 6.4                                | 38                    | 28           | 48           | 2.0           | 0.18 |
| 11   | Katsina | Bakori       | 200         | 30      | 6.7                                | 44                    | 32           | 56           | 2.6           | 0.29 |
| 12   | Katsina | Funtua       | 204         | 30      | 6.8                                | 44                    | 34           | 54           | 1.9           | 0.16 |
| 13   | Jigawa  | Kazaure      | 209         | 30      | 7.0                                | 81                    | 73           | 88           | 1.9           | 0.16 |
| 14   | Jigawa  | Babura       | 198         | 30      | 6.6                                | 48                    | 36           | 60           | 2.9           | 0.34 |
| 15   | Jigawa  | Maigatari    | 207         | 30      | 6.9                                | 48                    | 36           | 60           | 2.8           | 0.30 |
| 16   | Jigawa  | Miga         | 197         | 30      | 6.6                                | 25                    | 17           | 34           | 1.7           | 0.12 |
| 17   | Jigawa  | Kiyawa       | 180         | 30      | 6.0                                | 60                    | 50           | 70           | 1.6           | 0.12 |
| 18   | Jigawa  | Birnin_Kudu  | 177         | 29      | 6.1                                | 45                    | 35           | 55           | 1.7           | 0.13 |
| 19   | FCT     | Amac         | 192         | 29      | 6.6                                | 96                    | 91           | 99           | 1.7           | 0.13 |
| 20   | Zamfara | Bukkuyum     | 194         | 29      | 6.7                                | 28                    | 16           | 40           | 3.3           | 0.41 |
| 21   | Zamfara | Maradun      | 208         | 30      | 6.9                                | 45                    | 34           | 56           | 2.4           | 0.23 |
| 22   | Zamfara | Shinkafi     | 208         | 30      | 6.9                                | 44                    | 35           | 54           | 1.8           | 0.14 |
| 23   | Zamfara | Gusau        | 157         | 23      | 6.8                                | 30                    | 19           | 41           | 2.2           | 0.20 |
| 24   | Zamfara | Bungudu      | 159         | 23      | 6.9                                | 38                    | 27           | 49           | 1.9           | 0.14 |
| 25   | Zamfara | Maru         | 141         | 23      | 6.1                                | 21                    | 7            | 35           | 3.9           | 0.56 |
| 26   | Bauchi  | Gamawa       | 181         | 28      | 6.5                                | 60                    | 50           | 71           | 2.0           | 0.17 |
| 27   | Bauchi  | Itas-Gadua   | 208         | 30      | 6.9                                | 50                    | 38           | 63           | 3.1           | 0.35 |
| 28   | Bauchi  | Ningi        | 203         | 30      | 6.8                                | 40                    | 29           | 51           | 2.6           | 0.27 |
| 29   | Bauchi  | Bauchi       | 198         | 29      | 6.8                                | 70                    | 60           | 80           | 2.2           | 0.21 |
| 30   | Kaduna  | Makarfi      | 203         | 30      | 6.8                                | 25                    | 14           | 35           | 2.9           | 0.33 |
| 31   | Kaduna  | Ikara        | 207         | 30      | 6.9                                | 39                    | 27           | 51           | 3.0           | 0.34 |
| 32   | Kaduna  | Zaria        | 205         | 30      | 6.8                                | 45                    | 36           | 55           | 1.8           | 0.14 |
| 33   | Kaduna  | Igabi        | 202         | 29      | 7.0                                | 59                    | 47           | 72           | 3.3           | 0.38 |
| 34   | Kaduna  | Kaduna North | 186         | 29      | 6.4                                | 83                    | 74           | 89           | 1.8           | 0.14 |
| 35   | Kaduna  | Chikun       | 171         | 25      | 6.8                                | 95                    | 87           | 98           | 2.7           | 0.29 |
| 36   | Kebbi   | Jega         | 200         | 30      | 6.7                                | 18                    | 12           | 26           | 1.8           | 0.14 |
| 37   | Kebbi   | Suru         | 207         | 30      | 6.9                                | 10                    | 6            | 17           | 1.8           | 0.13 |
| 38   | Kebbi   | Koko Besse   | 201         | 30      | 6.7                                | 15                    | 8            | 29           | 4.2           | 0.56 |
| 39   | Kaduna  | Sabo Gari    | 207         | 30      | 6.9                                | 76                    | 66           | 86           | 2.7           | 0.28 |
| 40   | Kaduna  | Kaduna South | 186         | 30      | 6.4                                | 89                    | 81           | 94           | 1.9           | 0.17 |
|      |         |              |             |         |                                    |                       |              |              |               |      |

<sup>1</sup> Only clusters that were surveyed are included

<sup>2</sup> When the design effect was estimated to be less than 1 we present it as 1, and the ICC=0.

Table 2: DPT1 Coverage per LGA,Nigeria 2014. Immunization Coverage Survey<sup>1,2</sup>

| S/No | State   | Lga          | Sample Size | Cluster | Average No. of respondents/ cluster | Coverage Estimate (%) | Lower 95% CI | Upper 95% CI | Design Effect | ICC  |
|------|---------|--------------|-------------|---------|-------------------------------------|-----------------------|--------------|--------------|---------------|------|
| 1    | Sokoto  | Illela       | 195         | 30      | 6.5                                 | 17                    | 11           | 27           | 2.0           | 0.18 |
| 2    | Sokoto  | Wurno        | 210         | 30      | 7.0                                 | 24                    | 14           | 34           | 2.8           | 0.30 |
| 3    | Sokoto  | Rabah        | 210         | 30      | 7.0                                 | 11                    | 6            | 18           | 1.9           | 0.15 |
| 4    | Sokoto  | Kware        | 201         | 30      | 6.7                                 | 8                     | 5            | 15           | 1.8           | 0.13 |
| 5    | Sokoto  | Shagari      | 206         | 30      | 6.9                                 | 6                     | 3            | 14           | 2.3           | 0.23 |
| 6    | Sokoto  | Wamako       | 203         | 30      | 6.8                                 | 27                    | 15           | 38           | 3.2           | 0.38 |
| 7    | Katsina | Batagarawa   | 207         | 30      | 6.9                                 | 34                    | 22           | 47           | 3.4           | 0.40 |
| 8    | Katsina | Mashi        | 202         | 30      | 6.7                                 | 21                    | 15           | 28           | 1.2           | 0.03 |
| 9    | Katsina | Batsari      | 192         | 28      | 6.9                                 | 44                    | 33           | 55           | 2.2           | 0.21 |
| 10   | Katsina | Malumfashi   | 193         | 30      | 6.4                                 | 39                    | 28           | 51           | 2.4           | 0.27 |
| 11   | Katsina | Bakori       | 200         | 30      | 6.7                                 | 42                    | 31           | 53           | 2.5           | 0.26 |
| 12   | Katsina | Funtua       | 204         | 30      | 6.8                                 | 41                    | 31           | 51           | 2.0           | 0.17 |
| 13   | Jigawa  | Kazaure      | 209         | 30      | 7.0                                 | 77                    | 68           | 86           | 2.3           | 0.21 |
| 14   | Jigawa  | Babura       | 198         | 30      | 6.6                                 | 44                    | 32           | 56           | 2.7           | 0.30 |
| 15   | Jigawa  | Maigatari    | 207         | 30      | 6.9                                 | 47                    | 35           | 59           | 2.9           | 0.32 |
| 16   | Jigawa  | Miga         | 197         | 30      | 6.6                                 | 23                    | 15           | 32           | 1.9           | 0.17 |
| 17   | Jigawa  | Kiyawa       | 180         | 30      | 6.0                                 | 58                    | 48           | 67           | 1.7           | 0.13 |
| 18   | Jigawa  | Birnin_Kudu  | 177         | 29      | 6.1                                 | 52                    | 43           | 61           | 1.5           | 0.10 |
| 19   | FCT     | Amac         | 192         | 29      | 6.6                                 | 95                    | 88           | 98           | 2.2           | 0.21 |
| 20   | Zamfara | Bukkuyum     | 194         | 29      | 6.7                                 | 36                    | 23           | 49           | 3.4           | 0.42 |
| 21   | Zamfara | Maradun      | 208         | 30      | 6.9                                 | 43                    | 32           | 53           | 2.3           | 0.22 |
| 22   | Zamfara | Shinkafi     | 208         | 30      | 6.9                                 | 50                    | 41           | 60           | 1.9           | 0.15 |
| 23   | Zamfara | Gusau        | 157         | 23      | 6.8                                 | 29                    | 19           | 40           | 2.0           | 0.18 |
| 24   | Zamfara | Bungudu      | 159         | 23      | 6.9                                 | 33                    | 22           | 44           | 2.0           | 0.16 |
| 25   | Zamfara | Maru         | 141         | 23      | 6.1                                 | 23                    | 8            | 39           | 4.2           | 0.62 |
| 26   | Bauchi  | Gamawa       | 181         | 28      | 6.5                                 | 56                    | 45           | 67           | 2.0           | 0.19 |
| 27   | Bauchi  | Itas-Gadua   | 208         | 30      | 6.9                                 | 52                    | 41           | 64           | 2.8           | 0.30 |
| 28   | Bauchi  | Ningi        | 203         | 30      | 6.8                                 | 38                    | 27           | 50           | 2.6           | 0.27 |
| 29   | Bauchi  | Bauchi       | 198         | 29      | 6.8                                 | 68                    | 58           | 77           | 1.9           | 0.15 |
| 30   | Kaduna  | Makarfi      | 203         | 30      | 6.8                                 | 30                    | 18           | 41           | 2.9           | 0.34 |
| 31   | Kaduna  | Ikara        | 207         | 30      | 6.9                                 | 40                    | 29           | 51           | 2.5           | 0.25 |
| 32   | Kaduna  | Zaria        | 205         | 30      | 6.8                                 | 33                    | 24           | 41           | 1.5           | 0.09 |
| 33   | Kaduna  | Igabi        | 202         | 29      | 7.0                                 | 57                    | 46           | 69           | 2.8           | 0.30 |
| 34   | Kaduna  | Kaduna North | 186         | 29      | 6.4                                 | 77                    | 69           | 86           | 2.0           | 0.18 |
| 35   | Kaduna  | Chikun       | 171         | 25      | 6.8                                 | 94                    | 86           | 98           | 2.1           | 0.18 |
| 36   | Kebbi   | Jega         | 200         | 30      | 6.7                                 | 20                    | 13           | 30           | 2.2           | 0.21 |
| 37   | Kebbi   | Suru         | 207         | 30      | 6.9                                 | 13                    | 7            | 22           | 2.4           | 0.23 |
| 38   | Kebbi   | Koko Besse   | 201         | 30      | 6.7                                 | 19                    | 11           | 33           | 3.8           | 0.50 |
| 39   | Kaduna  | Sabo Gari    | 207         | 30      | 6.9                                 | 70                    | 59           | 81           | 2.7           | 0.29 |
| 40   | Kaduna  | Kaduna South | 186         | 30      | 6.4                                 | 81                    | 73           | 87           | 1.4           | 0.08 |
|      |         |              |             |         |                                     |                       |              |              |               |      |

<sup>1</sup> Only clusters that were surveyed are included

<sup>2</sup> When the design effect was estimated to be less than 1 we present it as 1, and the ICC=0.

Table 3: DPT3 Coverage per LGA, Nigeria 2014. Immunization Coverage Survey<sup>1,2</sup>

| S/No | State   | Lga          | Sample Size | Cluster | Average No. of respondents/ cluster | Coverage Estimate (%) | Lower 95% CI | Upper 95% CI | Design Effect | ICC  |
|------|---------|--------------|-------------|---------|-------------------------------------|-----------------------|--------------|--------------|---------------|------|
| 1    | Sokoto  | Illela       | 195         | 30      | 6.5                                 | 2                     | 1            | 6            | 1.4           | 0.08 |
| 2    | Sokoto  | Wurno        | 210         | 30      | 7.0                                 | 11                    | 7            | 19           | 1.8           | 0.13 |
| 3    | Sokoto  | Rabah        | 210         | 30      | 7.0                                 | 2                     | 1            | 6            | 1.4           | 0.07 |
| 4    | Sokoto  | Kware        | 201         | 30      | 6.7                                 | 0                     | 0            | 3            | 1.0           | 0.00 |
| 5    | Sokoto  | Shagari      | 206         | 30      | 6.9                                 | 1                     | 0            | 6            | 1.6           | 0.11 |
| 6    | Sokoto  | Wamako       | 203         | 30      | 6.8                                 | 9                     | 5            | 18           | 2.7           | 0.29 |
| 7    | Katsina | Batagarawa   | 207         | 30      | 6.9                                 | 18                    | 11           | 28           | 2.4           | 0.24 |
| 8    | Katsina | Mashi        | 202         | 30      | 6.7                                 | 4                     | 2            | 9            | 1.6           | 0.10 |
| 9    | Katsina | Batsari      | 192         | 28      | 6.9                                 | 12                    | 6            | 22           | 2.8           | 0.30 |
| 10   | Katsina | Malumfashi   | 193         | 30      | 6.4                                 | 14                    | 9            | 22           | 1.6           | 0.12 |
| 11   | Katsina | Bakori       | 200         | 30      | 6.7                                 | 20                    | 13           | 30           | 2.4           | 0.24 |
| 12   | Katsina | Funtua       | 204         | 30      | 6.8                                 | 26                    | 18           | 35           | 1.8           | 0.14 |
| 13   | Jigawa  | Kazaure      | 209         | 30      | 7.0                                 | 50                    | 40           | 61           | 2.2           | 0.20 |
| 14   | Jigawa  | Babura       | 198         | 30      | 6.6                                 | 13                    | 8            | 20           | 1.5           | 0.08 |
| 15   | Jigawa  | Maigatari    | 207         | 30      | 6.9                                 | 15                    | 9            | 25           | 2.6           | 0.27 |
| 16   | Jigawa  | Miga         | 197         | 30      | 6.6                                 | 6                     | 2            | 12           | 2.1           | 0.19 |
| 17   | Jigawa  | Kiyawa       | 180         | 30      | 6.0                                 | 18                    | 11           | 28           | 2.1           | 0.21 |
| 18   | Jigawa  | Birnin_Kudu  | 177         | 29      | 6.1                                 | 22                    | 13           | 31           | 2.2           | 0.23 |
| 19   | FCT     | Amac         | 192         | 29      | 6.6                                 | 63                    | 53           | 72           | 1.8           | 0.14 |
| 20   | Zamfara | Bukkuyum     | 194         | 29      | 6.7                                 | 14                    | 7            | 25           | 2.8           | 0.32 |
| 21   | Zamfara | Maradun      | 208         | 30      | 6.9                                 | 20                    | 11           | 32           | 3.4           | 0.40 |
| 22   | Zamfara | Shinkafi     | 208         | 30      | 6.9                                 | 25                    | 17           | 33           | 1.8           | 0.13 |
| 23   | Zamfara | Gusau        | 157         | 23      | 6.8                                 | 10                    | 4            | 20           | 2.7           | 0.29 |
| 24   | Zamfara | Bungudu      | 159         | 23      | 6.9                                 | 11                    | 7            | 18           | 1.3           | 0.05 |
| 25   | Zamfara | Maru         | 141         | 23      | 6.1                                 | 6                     | 2            | 13           | 1.7           | 0.14 |
| 26   | Bauchi  | Gamawa       | 181         | 28      | 6.5                                 | 25                    | 13           | 36           | 3.1           | 0.38 |
| 27   | Bauchi  | Itas-Gadau   | 208         | 30      | 6.9                                 | 39                    | 27           | 51           | 3.1           | 0.35 |
| 28   | Bauchi  | Ningi        | 203         | 30      | 6.8                                 | 18                    | 10           | 29           | 2.9           | 0.32 |
| 29   | Bauchi  | Bauchi       | 198         | 29      | 6.8                                 | 25                    | 16           | 33           | 1.7           | 0.13 |
| 30   | Kaduna  | Makarfi      | 203         | 30      | 6.8                                 | 15                    | 9            | 24           | 2.1           | 0.19 |
| 31   | Kaduna  | Ikara        | 207         | 30      | 6.9                                 | 20                    | 9            | 32           | 3.9           | 0.50 |
| 32   | Kaduna  | Zaria        | 205         | 30      | 6.8                                 | 7                     | 4            | 12           | 1.0           | 0.00 |
| 33   | Kaduna  | Igabi        | 202         | 29      | 7.0                                 | 30                    | 20           | 40           | 2.2           | 0.20 |
| 34   | Kaduna  | Kaduna North | 186         | 29      | 6.4                                 | 45                    | 35           | 55           | 1.9           | 0.16 |
| 35   | Kaduna  | Chikun       | 171         | 25      | 6.8                                 | 63                    | 54           | 72           | 1.3           | 0.05 |
| 36   | Kebbi   | Jega         | 200         | 30      | 6.7                                 | 5                     | 2            | 12           | 2.2           | 0.21 |
| 37   | Kebbi   | Suru         | 207         | 30      | 6.9                                 | 4                     | 2            | 11           | 2.4           | 0.24 |
| 38   | Kebbi   | Koko Besse   | 201         | 30      | 6.7                                 | 4                     | 2            | 10           | 1.7           | 0.12 |
| 39   | Kaduna  | Sabo Gari    | 207         | 30      | 6.9                                 | 42                    | 32           | 52           | 2.1           | 0.19 |
| 40   | Kaduna  | Kaduna South | 186         | 30      | 6.4                                 | 46                    | 37           | 54           | 1.2           | 0.04 |
|      |         |              |             |         |                                     |                       |              |              |               |      |

<sup>1</sup> Only clusters that were surveyed are included

<sup>2</sup> When the design effect was estimated to be less than 1 we present it as 1, and the ICC=0.

**Table 4: Measles Coverage per LGA, Nigeria 2014. Immunization Coverage Survey<sup>1,2</sup>**

| S/No | State   | Lga          | Sample Size | Cluster | Average No. of respondents/ cluster | Coverage Estimate (%) | Lower 95% CI | Upper 95% CI | Design Effect | ICC  |
|------|---------|--------------|-------------|---------|-------------------------------------|-----------------------|--------------|--------------|---------------|------|
| 1    | Sokoto  | Illela       | 195         | 30      | 6.5                                 | 7                     | 3            | 15           | 2.4           | 0.26 |
| 2    | Sokoto  | Wurno        | 210         | 30      | 7.0                                 | 20                    | 11           | 30           | 2.5           | 0.25 |
| 3    | Sokoto  | Rabah        | 210         | 30      | 7.0                                 | 8                     | 4            | 13           | 1.4           | 0.06 |
| 4    | Sokoto  | Kware        | 201         | 30      | 6.7                                 | 9                     | 5            | 16           | 1.7           | 0.12 |
| 5    | Sokoto  | Shagari      | 206         | 30      | 6.9                                 | 3                     | 1            | 9            | 2.3           | 0.21 |
| 6    | Sokoto  | Wamako       | 203         | 30      | 6.8                                 | 21                    | 11           | 31           | 2.9           | 0.33 |
| 7    | Katsina | Batagarawa   | 207         | 30      | 6.9                                 | 28                    | 17           | 38           | 2.8           | 0.31 |
| 8    | Katsina | Mashi        | 202         | 30      | 6.7                                 | 16                    | 11           | 23           | 1.4           | 0.06 |
| 9    | Katsina | Batsari      | 192         | 28      | 6.9                                 | 40                    | 27           | 52           | 2.9           | 0.32 |
| 10   | Katsina | Malumfashi   | 193         | 30      | 6.4                                 | 33                    | 21           | 44           | 2.6           | 0.29 |
| 11   | Katsina | Bakori       | 200         | 30      | 6.7                                 | 29                    | 20           | 38           | 2.0           | 0.17 |
| 12   | Katsina | Funtua       | 204         | 30      | 6.8                                 | 22                    | 15           | 30           | 1.6           | 0.10 |
| 13   | Jigawa  | Kazaure      | 209         | 30      | 7.0                                 | 54                    | 43           | 65           | 2.4           | 0.24 |
| 14   | Jigawa  | Babura       | 198         | 30      | 6.6                                 | 29                    | 18           | 39           | 2.5           | 0.27 |
| 15   | Jigawa  | Maigatari    | 207         | 30      | 6.9                                 | 40                    | 29           | 51           | 2.5           | 0.26 |
| 16   | Jigawa  | Miga         | 197         | 30      | 6.6                                 | 10                    | 6            | 16           | 1.3           | 0.05 |
| 17   | Jigawa  | Kiyawa       | 180         | 30      | 6.0                                 | 39                    | 31           | 48           | 1.2           | 0.04 |
| 18   | Jigawa  | Birnin_Kudu  | 177         | 29      | 6.1                                 | 48                    | 38           | 58           | 1.5           | 0.10 |
| 19   | FCT     | Amac         | 192         | 29      | 6.6                                 | 88                    | 78           | 93           | 2.4           | 0.24 |
| 20   | Zamfara | Bukkuyum     | 194         | 29      | 6.7                                 | 26                    | 14           | 37           | 3.1           | 0.37 |
| 21   | Zamfara | Maradun      | 208         | 30      | 6.9                                 | 36                    | 25           | 46           | 2.3           | 0.22 |
| 22   | Zamfara | Shinkafi     | 208         | 30      | 6.9                                 | 46                    | 37           | 55           | 1.6           | 0.10 |
| 23   | Zamfara | Gusau        | 157         | 23      | 6.8                                 | 18                    | 10           | 29           | 2.1           | 0.20 |
| 24   | Zamfara | Bungudu      | 159         | 23      | 6.9                                 | 28                    | 18           | 38           | 1.8           | 0.13 |
| 25   | Zamfara | Maru         | 141         | 23      | 6.1                                 | 21                    | 7            | 34           | 3.8           | 0.55 |
| 26   | Bauchi  | Gamawa       | 181         | 28      | 6.5                                 | 55                    | 44           | 66           | 2.1           | 0.21 |
| 27   | Bauchi  | Itas-Gadau   | 208         | 30      | 6.9                                 | 49                    | 37           | 61           | 2.7           | 0.28 |
| 28   | Bauchi  | Ningi        | 203         | 30      | 6.8                                 | 31                    | 21           | 40           | 2.2           | 0.20 |
| 29   | Bauchi  | Bauchi       | 198         | 29      | 6.8                                 | 47                    | 37           | 57           | 2.0           | 0.17 |
| 30   | Kaduna  | Makarfi      | 203         | 30      | 6.8                                 | 22                    | 13           | 31           | 2.3           | 0.23 |
| 31   | Kaduna  | Ikara        | 207         | 30      | 6.9                                 | 26                    | 15           | 36           | 2.9           | 0.32 |
| 32   | Kaduna  | Zaria        | 205         | 30      | 6.8                                 | 18                    | 13           | 24           | 1.0           | 0.00 |
| 33   | Kaduna  | Igabi        | 202         | 29      | 7.0                                 | 45                    | 32           | 57           | 3.2           | 0.37 |
| 34   | Kaduna  | Kaduna North | 186         | 29      | 6.4                                 | 67                    | 56           | 77           | 2.3           | 0.23 |
| 35   | Kaduna  | Chikun       | 171         | 25      | 6.8                                 | 90                    | 81           | 95           | 2.2           | 0.21 |
| 36   | kebbi   | Jega         | 200         | 30      | 6.7                                 | 15                    | 9            | 24           | 2.1           | 0.19 |
| 37   | kebbi   | Suru         | 207         | 30      | 6.9                                 | 10                    | 6            | 18           | 2.0           | 0.17 |
| 38   | kebbi   | Koko Besse   | 201         | 30      | 6.7                                 | 16                    | 8            | 29           | 4.1           | 0.55 |
| 39   | Kaduna  | Sabo Gari    | 207         | 30      | 6.9                                 | 54                    | 42           | 66           | 2.8           | 0.31 |
| 40   | Kaduna  | Kaduna South | 186         | 30      | 6.4                                 | 65                    | 56           | 74           | 1.6           | 0.11 |
|      |         |              |             |         |                                     |                       |              |              |               |      |

<sup>1</sup> Only clusters that were surveyed are included

<sup>2</sup> When the design effect was estimated to be less than 1 we present it as 1, and the ICC=0.

Table 5: OPV0 Coverage per LGA, Nigeria 2014. Immunization Coverage Survey<sup>1,2</sup>

| S/No | State   | Lga          | Sample Size | Cluster | Average No. of respondents/ cluster | Coverage Estimate (%) | Lower 95% CI | Upper 95% CI | Design Effect | ICC  |
|------|---------|--------------|-------------|---------|-------------------------------------|-----------------------|--------------|--------------|---------------|------|
| 1    | Sokoto  | Illela       | 195         | 30      | 6.5                                 | 15                    | 9            | 24           | 2.3           | 0.23 |
| 2    | Sokoto  | Wurno        | 210         | 30      | 7.0                                 | 28                    | 17           | 38           | 2.8           | 0.31 |
| 3    | Sokoto  | Rabah        | 210         | 30      | 7.0                                 | 5                     | 3            | 10           | 1.1           | 0.01 |
| 4    | Sokoto  | Kware        | 201         | 30      | 6.7                                 | 7                     | 4            | 12           | 1.1           | 0.02 |
| 5    | Sokoto  | Shagari      | 206         | 30      | 6.9                                 | 10                    | 5            | 17           | 2.0           | 0.17 |
| 6    | Sokoto  | Wamako       | 203         | 30      | 6.8                                 | 23                    | 12           | 33           | 2.9           | 0.33 |
| 7    | Katsina | Batagarawa   | 207         | 30      | 6.9                                 | 27                    | 16           | 38           | 2.8           | 0.31 |
| 8    | Katsina | Mashi        | 202         | 30      | 6.7                                 | 22                    | 15           | 29           | 1.5           | 0.08 |
| 9    | Katsina | Batsari      | 192         | 28      | 6.9                                 | 34                    | 24           | 44           | 2.1           | 0.19 |
| 10   | Katsina | Malumfashi   | 193         | 30      | 6.4                                 | 36                    | 26           | 47           | 2.2           | 0.22 |
| 11   | Katsina | Bakori       | 200         | 30      | 6.7                                 | 22                    | 14           | 29           | 1.8           | 0.14 |
| 12   | Katsina | Funtua       | 204         | 30      | 6.8                                 | 34                    | 25           | 43           | 1.7           | 0.13 |
| 13   | Jigawa  | Kazaure      | 209         | 30      | 7.0                                 | 76                    | 68           | 84           | 1.9           | 0.15 |
| 14   | Jigawa  | Babura       | 198         | 30      | 6.6                                 | 45                    | 32           | 58           | 3.0           | 0.36 |
| 15   | Jigawa  | Maigatari    | 207         | 30      | 6.9                                 | 43                    | 31           | 56           | 3.0           | 0.35 |
| 16   | Jigawa  | Miga         | 197         | 30      | 6.6                                 | 26                    | 17           | 35           | 1.8           | 0.15 |
| 17   | Jigawa  | Kiyawa       | 180         | 30      | 6.0                                 | 60                    | 51           | 69           | 1.5           | 0.10 |
| 18   | Jigawa  | Birnin_Kudu  | 177         | 29      | 6.1                                 | 50                    | 40           | 60           | 1.7           | 0.14 |
| 19   | FCT     | Amac         | 192         | 29      | 6.6                                 | 89                    | 81           | 94           | 2.0           | 0.17 |
| 20   | Zamfara | Bukkuyum     | 194         | 29      | 6.7                                 | 11                    | 6            | 22           | 3.0           | 0.35 |
| 21   | Zamfara | Maradun      | 208         | 30      | 6.9                                 | 42                    | 32           | 53           | 2.2           | 0.19 |
| 22   | Zamfara | Shinkafi     | 208         | 30      | 6.9                                 | 43                    | 34           | 52           | 1.7           | 0.12 |
| 23   | Zamfara | Gusau        | 157         | 23      | 6.8                                 | 30                    | 19           | 41           | 2.0           | 0.17 |
| 24   | Zamfara | Bungudu      | 159         | 23      | 6.9                                 | 35                    | 24           | 45           | 1.7           | 0.11 |
| 25   | Zamfara | Maru         | 141         | 23      | 6.1                                 | 24                    | 8            | 40           | 4.6           | 0.69 |
| 26   | Bauchi  | Gamawa       | 181         | 28      | 6.5                                 | 56                    | 45           | 67           | 2.2           | 0.21 |
| 27   | Bauchi  | Itas-Gadau   | 208         | 30      | 6.9                                 | 50                    | 38           | 62           | 2.8           | 0.31 |
| 28   | Bauchi  | Ningi        | 203         | 30      | 6.8                                 | 42                    | 33           | 52           | 1.9           | 0.15 |
| 29   | Bauchi  | Bauchi       | 198         | 29      | 6.8                                 | 69                    | 60           | 78           | 1.8           | 0.13 |
| 30   | Kaduna  | Makarfi      | 203         | 30      | 6.8                                 | 22                    | 12           | 31           | 2.6           | 0.27 |
| 31   | Kaduna  | Ikara        | 207         | 30      | 6.9                                 | 24                    | 12           | 37           | 4.2           | 0.54 |
| 32   | Kaduna  | Zaria        | 205         | 30      | 6.8                                 | 33                    | 23           | 43           | 2.1           | 0.18 |
| 33   | Kaduna  | Igabi        | 202         | 29      | 7.0                                 | 44                    | 33           | 55           | 2.4           | 0.24 |
| 34   | Kaduna  | Kaduna North | 186         | 29      | 6.4                                 | 77                    | 68           | 86           | 2.0           | 0.18 |
| 35   | Kaduna  | Chikun       | 171         | 25      | 6.8                                 | 94                    | 87           | 97           | 1.5           | 0.08 |
| 36   | Kebbi   | Jega         | 200         | 30      | 6.7                                 | 17                    | 11           | 26           | 2.1           | 0.20 |
| 37   | Kebbi   | Suru         | 207         | 30      | 6.9                                 | 8                     | 4            | 16           | 2.5           | 0.25 |
| 38   | Kebbi   | Koko Besse   | 201         | 30      | 6.7                                 | 6                     | 2            | 15           | 3.0           | 0.35 |
| 39   | Kaduna  | Sabo Gari    | 207         | 30      | 6.9                                 | 65                    | 54           | 76           |               |      |
| 40   | Kaduna  | Kaduna South | 186         | 30      | 6.2                                 | 80                    | 72           | 88           |               |      |
|      |         |              |             |         |                                     |                       |              |              |               |      |

<sup>1</sup> Only clusters that were surveyed are included

<sup>2</sup> When the design effect was estimated to be less than 1 we present it as 1, and the ICC=0.

Table 6: OPV1 Coverage per LGA, Nigeria 2014. Immunization Coverage Survey<sup>1,2</sup>

| S/No | State   | Lga          | Sample Size | Cluster | Average No. of respondents/ cluster | Coverage Estimate (%) | Lower 95% CI | Upper 95% CI | Design Effect | ICC  |
|------|---------|--------------|-------------|---------|-------------------------------------|-----------------------|--------------|--------------|---------------|------|
| 1    | Sokoto  | Illela       | 195         | 30      | 6.5                                 | 19                    | 12           | 28           | 2.1           | 0.20 |
| 2    | Sokoto  | Wurno        | 210         | 30      | 7.0                                 | 30                    | 20           | 40           | 2.5           | 0.25 |
| 3    | Sokoto  | Rabah        | 210         | 30      | 7.0                                 | 14                    | 8            | 22           | 1.9           | 0.16 |
| 4    | Sokoto  | Kware        | 201         | 30      | 6.7                                 | 12                    | 8            | 20           | 1.6           | 0.11 |
| 5    | Sokoto  | Shagari      | 206         | 30      | 6.9                                 | 10                    | 5            | 17           | 2.0           | 0.17 |
| 6    | Sokoto  | Wamako       | 203         | 30      | 6.8                                 | 30                    | 18           | 42           | 3.2           | 0.39 |
| 7    | Katsina | Batagarawa   | 207         | 30      | 6.9                                 | 33                    | 22           | 45           | 3.0           | 0.34 |
| 8    | Katsina | Mashi        | 202         | 30      | 6.7                                 | 35                    | 25           | 44           | 1.9           | 0.16 |
| 9    | Katsina | Batsari      | 192         | 28      | 6.9                                 | 48                    | 37           | 60           | 2.3           | 0.22 |
| 10   | Katsina | Malumfashi   | 193         | 30      | 6.4                                 | 40                    | 29           | 51           | 2.2           | 0.21 |
| 11   | Katsina | Bakori       | 200         | 30      | 6.7                                 | 50                    | 38           | 61           | 2.5           | 0.27 |
| 12   | Katsina | Funtua       | 204         | 30      | 6.8                                 | 45                    | 35           | 55           | 2.0           | 0.17 |
| 13   | Jigawa  | Kazaure      | 209         | 30      | 7.0                                 | 80                    | 72           | 88           | 2.0           | 0.16 |
| 14   | Jigawa  | Babura       | 198         | 30      | 6.6                                 | 51                    | 38           | 63           | 3.0           | 0.36 |
| 15   | Jigawa  | Maigatari    | 207         | 30      | 6.9                                 | 57                    | 44           | 70           | 3.3           | 0.39 |
| 16   | Jigawa  | Miga         | 197         | 30      | 6.6                                 | 28                    | 20           | 36           | 1.6           | 0.11 |
| 17   | Jigawa  | Kiyawa       | 180         | 30      | 6.0                                 | 61                    | 52           | 70           | 1.5           | 0.09 |
| 18   | Jigawa  | Birnin_Kudu  | 177         | 29      | 6.1                                 | 59                    | 49           | 70           | 1.9           | 0.18 |
| 19   | FCT     | Amac         | 192         | 29      | 6.6                                 | 96                    | 91           | 99           | 1.7           | 0.13 |
| 20   | Zamfara | Bukkuyum     | 194         | 29      | 6.7                                 | 36                    | 23           | 49           | 3.6           | 0.45 |
| 21   | Zamfara | Maradun      | 208         | 30      | 6.9                                 | 49                    | 39           | 59           | 2.0           | 0.18 |
| 22   | Zamfara | Shinkafi     | 208         | 30      | 6.9                                 | 57                    | 47           | 66           | 1.9           | 0.14 |
| 23   | Zamfara | Gusau        | 157         | 23      | 6.8                                 | 32                    | 22           | 43           | 2.0           | 0.17 |
| 24   | Zamfara | Bungudu      | 159         | 23      | 6.9                                 | 38                    | 28           | 49           | 1.8           | 0.14 |
| 25   | Zamfara | Maru         | 141         | 23      | 6.1                                 | 29                    | 13           | 45           | 4.1           | 0.60 |
| 26   | Bauchi  | Gamawa       | 181         | 28      | 6.5                                 | 68                    | 58           | 78           | 2.1           | 0.19 |
| 27   | Bauchi  | Itas-Gadua   | 208         | 30      | 6.9                                 | 56                    | 44           | 67           | 2.7           | 0.29 |
| 28   | Bauchi  | Ningi        | 203         | 30      | 6.8                                 | 49                    | 39           | 60           | 2.1           | 0.19 |
| 29   | Bauchi  | Bauchi       | 198         | 29      | 6.8                                 | 72                    | 63           | 82           | 2.1           | 0.20 |
| 30   | Kaduna  | Makarfi      | 203         | 30      | 6.8                                 | 31                    | 19           | 42           | 3.0           | 0.34 |
| 31   | Kaduna  | Ikara        | 207         | 30      | 6.9                                 | 43                    | 31           | 54           | 2.7           | 0.29 |
| 32   | Kaduna  | Zaria        | 205         | 30      | 6.8                                 | 46                    | 37           | 56           | 1.7           | 0.12 |
| 33   | Kaduna  | Igabi        | 202         | 29      | 7.0                                 | 57                    | 44           | 70           | 3.4           | 0.40 |
| 34   | Kaduna  | Kaduna North | 186         | 29      | 6.4                                 | 82                    | 73           | 88           | 1.8           | 0.15 |
| 35   | Kaduna  | Chikun       | 171         | 25      | 6.8                                 | 98                    | 93           | 100          | 1.7           | 0.12 |
| 36   | Kebbi   | Jega         | 200         | 30      | 6.7                                 | 26                    | 15           | 36           | 2.8           | 0.31 |
| 37   | Kebbi   | Suru         | 207         | 30      | 6.9                                 | 12                    | 6            | 20           | 2.4           | 0.23 |
| 38   | Kebbi   | Koko Besse   | 201         | 30      | 6.7                                 | 17                    | 9            | 30           | 4.2           | 0.56 |
| 39   | Kaduna  | Sabo Gari    | 207         | 30      | 6.9                                 | 77                    | 66           | 87           | 3.0           | 0.34 |
| 40   | Kaduna  | Kaduna South | 186         | 30      | 6.4                                 | 87                    | 78           | 92           | 1.9           | 0.16 |

<sup>1</sup> Only clusters that were surveyed are included

<sup>2</sup> When the design effect was estimated to be less than 1 we present it as 1, and the ICC=0.

Table 7: OPV3 Coverage per LGA,Nigeria 2014. Immunization Coverage Survey<sup>1,2</sup>

| S/No | State   | Lga          | Sample Size | Cluster | Average No. of respondents/ cluster | Coverage Estimate (%) | Lower 95% CI | Upper 95% CI | Design Effect | ICC  |
|------|---------|--------------|-------------|---------|-------------------------------------|-----------------------|--------------|--------------|---------------|------|
| 1    | Sokoto  | Illela       | 195         | 30      | 6.5                                 | 3                     | 1            | 8            | 1.7           | 0.13 |
| 2    | Sokoto  | Wurno        | 210         | 30      | 7.0                                 | 18                    | 11           | 29           | 2.8           | 0.30 |
| 3    | Sokoto  | Rabah        | 210         | 30      | 7.0                                 | 2                     | 1            | 5            | 1.0           | 0.00 |
| 4    | Sokoto  | Kware        | 201         | 30      | 6.7                                 | 2                     | 1            | 6            | 1.3           | 0.05 |
| 5    | Sokoto  | Shagari      | 206         | 30      | 6.9                                 | 1                     | 0            | 6            | 1.6           | 0.11 |
| 6    | Sokoto  | Wamako       | 203         | 30      | 6.8                                 | 12                    | 6            | 21           | 2.4           | 0.25 |
| 7    | Katsina | Batagarawa   | 207         | 30      | 6.9                                 | 21                    | 11           | 31           | 3.1           | 0.35 |
| 8    | Katsina | Mashi        | 202         | 30      | 6.7                                 | 5                     | 3            | 11           | 1.5           | 0.08 |
| 9    | Katsina | Batsari      | 192         | 28      | 6.9                                 | 13                    | 8            | 22           | 2.0           | 0.17 |
| 10   | Katsina | Malumfashi   | 193         | 30      | 6.4                                 | 24                    | 14           | 34           | 2.6           | 0.29 |
| 11   | Katsina | Bakori       | 200         | 30      | 6.7                                 | 23                    | 15           | 31           | 1.9           | 0.16 |
| 12   | Katsina | Funtua       | 204         | 30      | 6.8                                 | 31                    | 23           | 40           | 1.8           | 0.13 |
| 13   | Jigawa  | Kazaure      | 209         | 30      | 7.0                                 | 57                    | 45           | 69           | 2.9           | 0.32 |
| 14   | Jigawa  | Babura       | 198         | 30      | 6.6                                 | 23                    | 14           | 33           | 2.3           | 0.23 |
| 15   | Jigawa  | Maigatari    | 207         | 30      | 6.9                                 | 19                    | 11           | 33           | 4.0           | 0.51 |
| 16   | Jigawa  | Miga         | 197         | 30      | 6.6                                 | 6                     | 3            | 12           | 1.7           | 0.12 |
| 17   | Jigawa  | Kiyawa       | 180         | 30      | 6.0                                 | 18                    | 11           | 27           | 1.9           | 0.18 |
| 18   | Jigawa  | Birnin_Kudu  | 177         | 29      | 6.1                                 | 32                    | 22           | 41           | 1.8           | 0.15 |
| 19   | FCT     | Amac         | 192         | 29      | 6.6                                 | 66                    | 58           | 73           | 1.2           | 0.04 |
| 20   | Zamfara | Bukkuyum     | 194         | 29      | 6.7                                 | 12                    | 6            | 23           | 3.1           | 0.36 |
| 21   | Zamfara | Maradun      | 208         | 30      | 6.9                                 | 25                    | 14           | 35           | 2.7           | 0.29 |
| 22   | Zamfara | Shinkafi     | 208         | 30      | 6.9                                 | 30                    | 22           | 38           | 1.4           | 0.07 |
| 23   | Zamfara | Gusau        | 157         | 23      | 6.8                                 | 10                    | 5            | 21           | 2.5           | 0.25 |
| 24   | Zamfara | Bungudu      | 159         | 23      | 6.9                                 | 16                    | 10           | 25           | 1.5           | 0.09 |
| 25   | Zamfara | Maru         | 141         | 23      | 6.1                                 | 7                     | 3            | 16           | 2.1           | 0.21 |
| 26   | Bauchi  | Gamawa       | 181         | 28      | 6.5                                 | 30                    | 20           | 41           | 2.4           | 0.25 |
| 27   | Bauchi  | Itas-Gadau   | 208         | 30      | 6.9                                 | 44                    | 31           | 56           | 3.2           | 0.37 |
| 28   | Bauchi  | Ningi        | 203         | 30      | 6.8                                 | 18                    | 12           | 27           | 1.9           | 0.16 |
| 29   | Bauchi  | Bauchi       | 198         | 29      | 6.8                                 | 28                    | 20           | 37           | 1.8           | 0.13 |
| 30   | Kaduna  | Makarfi      | 203         | 30      | 6.8                                 | 20                    | 11           | 30           | 2.8           | 0.31 |
| 31   | Kaduna  | Ikara        | 207         | 30      | 6.9                                 | 21                    | 9            | 32           | 3.9           | 0.50 |
| 32   | Kaduna  | Zaria        | 205         | 30      | 6.8                                 | 27                    | 18           | 35           | 1.8           | 0.14 |
| 33   | Kaduna  | Igabi        | 202         | 29      | 7.0                                 | 29                    | 18           | 40           | 2.8           | 0.30 |
| 34   | Kaduna  | Kaduna North | 186         | 29      | 6.4                                 | 32                    | 24           | 41           | 1.4           | 0.07 |
| 35   | Kaduna  | Chikun       | 171         | 25      | 6.8                                 | 56                    | 47           | 66           | 1.5           | 0.08 |
| 36   | Kebbi   | Jega         | 200         | 30      | 6.7                                 | 8                     | 4            | 15           | 1.8           | 0.14 |
| 37   | Kebbi   | Suru         | 207         | 30      | 6.9                                 | 6                     | 3            | 13           | 2.1           | 0.19 |
| 38   | Kebbi   | Koko Besse   | 201         | 30      | 6.7                                 | 3                     | 1            | 7            | 1.2           | 0.03 |
| 39   | Kaduna  | Sabo Gari    | 207         | 30      | 6.9                                 | 50                    | 41           | 60           | 1.8           | 0.14 |
| 40   | Kaduna  | Kaduna South | 186         | 30      | 6.4                                 | 50                    | 43           | 57           | 1.0           | 0.00 |
|      |         |              |             |         |                                     |                       |              |              |               |      |

<sup>1</sup> Only clusters that were surveyed are included

<sup>2</sup> When the design effect was estimated to be less than 1 we present it as 1, and the ICC=0.

Table 8: Complete Coverage per LGA, Nigeria 2014. Immunization Coverage Survey<sup>1,2</sup>

| S/No | State   | Lga          | Sample Size | Cluster | Average No. of respondents/cluster | Coverage Estimate (%) | Lower 95% CI | Upper 95% CI | Design Effect | ICC  |
|------|---------|--------------|-------------|---------|------------------------------------|-----------------------|--------------|--------------|---------------|------|
| 1    | Sokoto  | Illela       | 195         | 30      | 6.5                                | 1                     | 0            | 3            | 1.0           | 0.00 |
| 2    | Sokoto  | Wurno        | 210         | 30      | 7.0                                | 10                    | 5            | 16           | 1.6           | 0.11 |
| 3    | Sokoto  | Rabah        | 210         | 30      | 7.0                                | 0                     | 0            | 3            | 1.0           | 0.00 |
| 4    | Sokoto  | Kware        | 201         | 30      | 6.7                                | 0                     | 0            | 0            | 1.0           | 0.00 |
| 5    | Sokoto  | Shagari      | 206         | 30      | 6.9                                | 0                     | 0            | 3            | 1.0           | 0.00 |
| 6    | Sokoto  | Wamako       | 203         | 30      | 6.8                                | 7                     | 3            | 15           | 2.8           | 0.30 |
| 7    | Katsina | Batagarawa   | 207         | 30      | 6.9                                | 10                    | 5            | 18           | 2.5           | 0.26 |
| 8    | Katsina | Mashi        | 202         | 30      | 6.7                                | 1                     | 0            | 4            | 1.0           | 0.00 |
| 9    | Katsina | Batsari      | 192         | 28      | 6.9                                | 8                     | 4            | 18           | 2.7           | 0.29 |
| 10   | Katsina | Malumfashi   | 193         | 30      | 6.4                                | 8                     | 4            | 16           | 2.2           | 0.21 |
| 11   | Katsina | Bakori       | 200         | 30      | 6.7                                | 14                    | 8            | 21           | 1.7           | 0.13 |
| 12   | Katsina | Funtua       | 204         | 30      | 6.8                                | 19                    | 13           | 27           | 1.7           | 0.11 |
| 13   | Jigawa  | Kazaure      | 209         | 30      | 7.0                                | 40                    | 29           | 51           | 2.6           | 0.26 |
| 14   | Jigawa  | Babura       | 198         | 30      | 6.6                                | 6                     | 3            | 11           | 1.1           | 0.02 |
| 15   | Jigawa  | Maigatari    | 207         | 30      | 6.9                                | 6                     | 2            | 13           | 2.5           | 0.25 |
| 16   | Jigawa  | Miga         | 197         | 30      | 6.6                                | 1                     | 0            | 4            | 1.0           | 0.00 |
| 17   | Jigawa  | Kiyawa       | 180         | 30      | 6.0                                | 13                    | 8            | 21           | 1.6           | 0.13 |
| 18   | Jigawa  | Birnin_Kudu  | 177         | 29      | 6.1                                | 15                    | 9            | 26           | 2.4           | 0.27 |
| 19   | FCT     | Amac         | 192         | 29      | 6.6                                | 51                    | 42           | 60           | 1.4           | 0.06 |
| 20   | Zamfara | Bukkuyum     | 194         | 29      | 6.7                                | 10                    | 5            | 20           | 2.9           | 0.33 |
| 21   | Zamfara | Maradun      | 208         | 30      | 6.9                                | 16                    | 8            | 28           | 3.7           | 0.46 |
| 22   | Zamfara | Shinkafi     | 208         | 30      | 6.9                                | 20                    | 15           | 26           | 1.1           | 0.01 |
| 23   | Zamfara | Gusau        | 157         | 23      | 6.8                                | 4                     | 1            | 16           | 3.8           | 0.49 |
| 24   | Zamfara | Bungudu      | 159         | 23      | 6.9                                | 8                     | 4            | 13           | 1.1           | 0.01 |
| 25   | Zamfara | Maru         | 141         | 23      | 6.1                                | 3                     | 1            | 8            | 1.4           | 0.07 |
| 26   | Bauchi  | Gamawa       | 181         | 28      | 6.5                                | 21                    | 10           | 32           | 3.4           | 0.43 |
| 27   | Bauchi  | Itas-Gadau   | 208         | 30      | 6.9                                | 36                    | 24           | 48           | 3.1           | 0.35 |
| 28   | Bauchi  | Ningi        | 203         | 30      | 6.8                                | 11                    | 7            | 19           | 1.7           | 0.13 |
| 29   | Bauchi  | Bauchi       | 198         | 29      | 6.8                                | 17                    | 12           | 25           | 1.5           | 0.08 |
| 30   | Kaduna  | Makarfi      | 203         | 30      | 6.8                                | 11                    | 6            | 18           | 1.9           | 0.15 |
| 31   | Kaduna  | Ikara        | 207         | 30      | 6.9                                | 15                    | 8            | 28           | 4.0           | 0.52 |
| 32   | Kaduna  | Zaria        | 205         | 30      | 6.8                                | 5                     | 3            | 9            | 1.0           | 0.00 |
| 33   | Kaduna  | Igabi        | 202         | 29      | 7.0                                | 18                    | 11           | 27           | 2.2           | 0.20 |
| 34   | Kaduna  | Kaduna North | 186         | 29      | 6.4                                | 24                    | 16           | 31           | 1.3           | 0.06 |
| 35   | Kaduna  | Chikun       | 171         | 25      | 6.8                                | 47                    | 38           | 55           | 1.2           | 0.03 |
| 36   | Kebbi   | Jega         | 200         | 30      | 6.7                                | 3                     | 1            | 7            | 1.2           | 0.03 |
| 37   | Kebbi   | Suru         | 207         | 30      | 6.9                                | 2                     | 1            | 8            | 2.1           | 0.19 |
| 38   | Kebbi   | Koko Besse   | 201         | 30      | 6.7                                | 1                     | 1            | 4            | 1.0           | 0.00 |
| 39   | Kaduna  | Sabo Gari    | 207         | 30      | 6.9                                | 33                    | 23           | 43           | 2.4           | 0.23 |
| 40   | Kaduna  | Kaduna South | 186         | 30      | 6.4                                | 29                    | 23           | 35           | 1.0           | 0.00 |

<sup>1</sup> Only clusters that were surveyed are included

<sup>2</sup> When the design effect was estimated to be less than 1 we present it as 1, and the ICC=0.
