# Supplementary material for: Routine Vaccination Coverage in Northern Nigeria: Results from 40 District-Level Cluster Surveys, 2014-2015
Source: PubMed Central journal article supplement (PMC5148043; doi:10.1371/journal.pone.0167835), 2016-12-09
Supplement: pone.0167835.s004.pdf [file pone.0167835.s004.pdf]

# **Routine Immunization Coverage Survey**

**Polio High Risk LGAs  
Northern Nigeria, 2014-2015**

**CDC - Nigeria**

**NSTOP**

**NFELTP**

**NPHCDA**

# Project Goal

As part of efforts to strengthen the routine immunization program, NSTOP planned to conduct coverage surveys in high-risk LGAs during 2014 to evaluate routine immunization coverage in children 12–23 months of age

# Objectives

- 1) To estimate LGA-level RI coverage
- 2) To estimate coverage in recent polio vaccination campaign rounds
- 3) To describe reasons for non-vaccination
- 4) To identify primary sources of vaccination information
- 5) To train the LGA immunization program team on conducting future household surveys

# Intended Use of Data

- Summary reports will be developed for each LGA
- Results will be reported to the state-level and national NPHCDA immunization program staff
- Data will be used to evaluate the vaccination coverage of polio and other antigens in high-risk LGAs
  - Useful for regional planning
  - Documenting Nigeria's progress towards polio eradication

# Survey methodology

- Cluster survey
- Two-stage selection of clusters and households
  - Cluster selection
    - “Enumeration Areas” from 2006 census (NPC)
    - Using PPS
  - Household and child selection
    - Households selected by movement through cluster from a randomly selected start point
    - Collect information on **ONE** child 12–23 months of age within the selected household

# Survey methodology

- A total of ~210 children interviewed per LGA
  - 30 clusters (EAs) in each LGA
  - Quota of 7 children in each cluster
  - Sample size
    - 420 → 393 (2 LGAs in pilot phase)
    - 7980 → 7422 (38 LGAs in phase 1 & phase 2)
- Maps and GPS coordinates used
  - For each selected cluster
  - Used for locating starting point and movement plan

# Questionnaire

- Standardized paper interview questionnaires
  - Bi-lingual in English and Hausa
  - Read aloud by trained interviewers
- Interview questions include
  - Socio-demographic information
  - Vaccination history from routine immunization
  - Vaccination history from most recent polio IPD round
  - Awareness of opportunities for routine immunizations
  - Reasons for non-vaccination

# Project Phases

- Field testing of survey instruments
  - February 2014
  - Administered questionnaires to English and Hausa speaking women around FCT
- Pilot phase
  - May 2014; 2 LGAs in Kaduna state
- Phase I
  - October 2014; 19 LGAs (*due to resource limitations, Ebola*)
- Phase II
  - January 2015; 19 additional LGAs



# Study Population

- Target: children 12–23 months of age
- In polio high-risk LGAs with NSLO assigned
  - Pilot phase
    - Kaduna (2)
  - Phase 1
    - Katsina (6)
    - Jigawa (6)
    - Sokoto (6)
    - FCT (1)
  - Phase 2
    - Bauchi (4)
    - Kaduna (6)
    - Kebbi (3)
    - Zamfara (6)

# RI Coverage Survey LGAs, Northern Nigeria

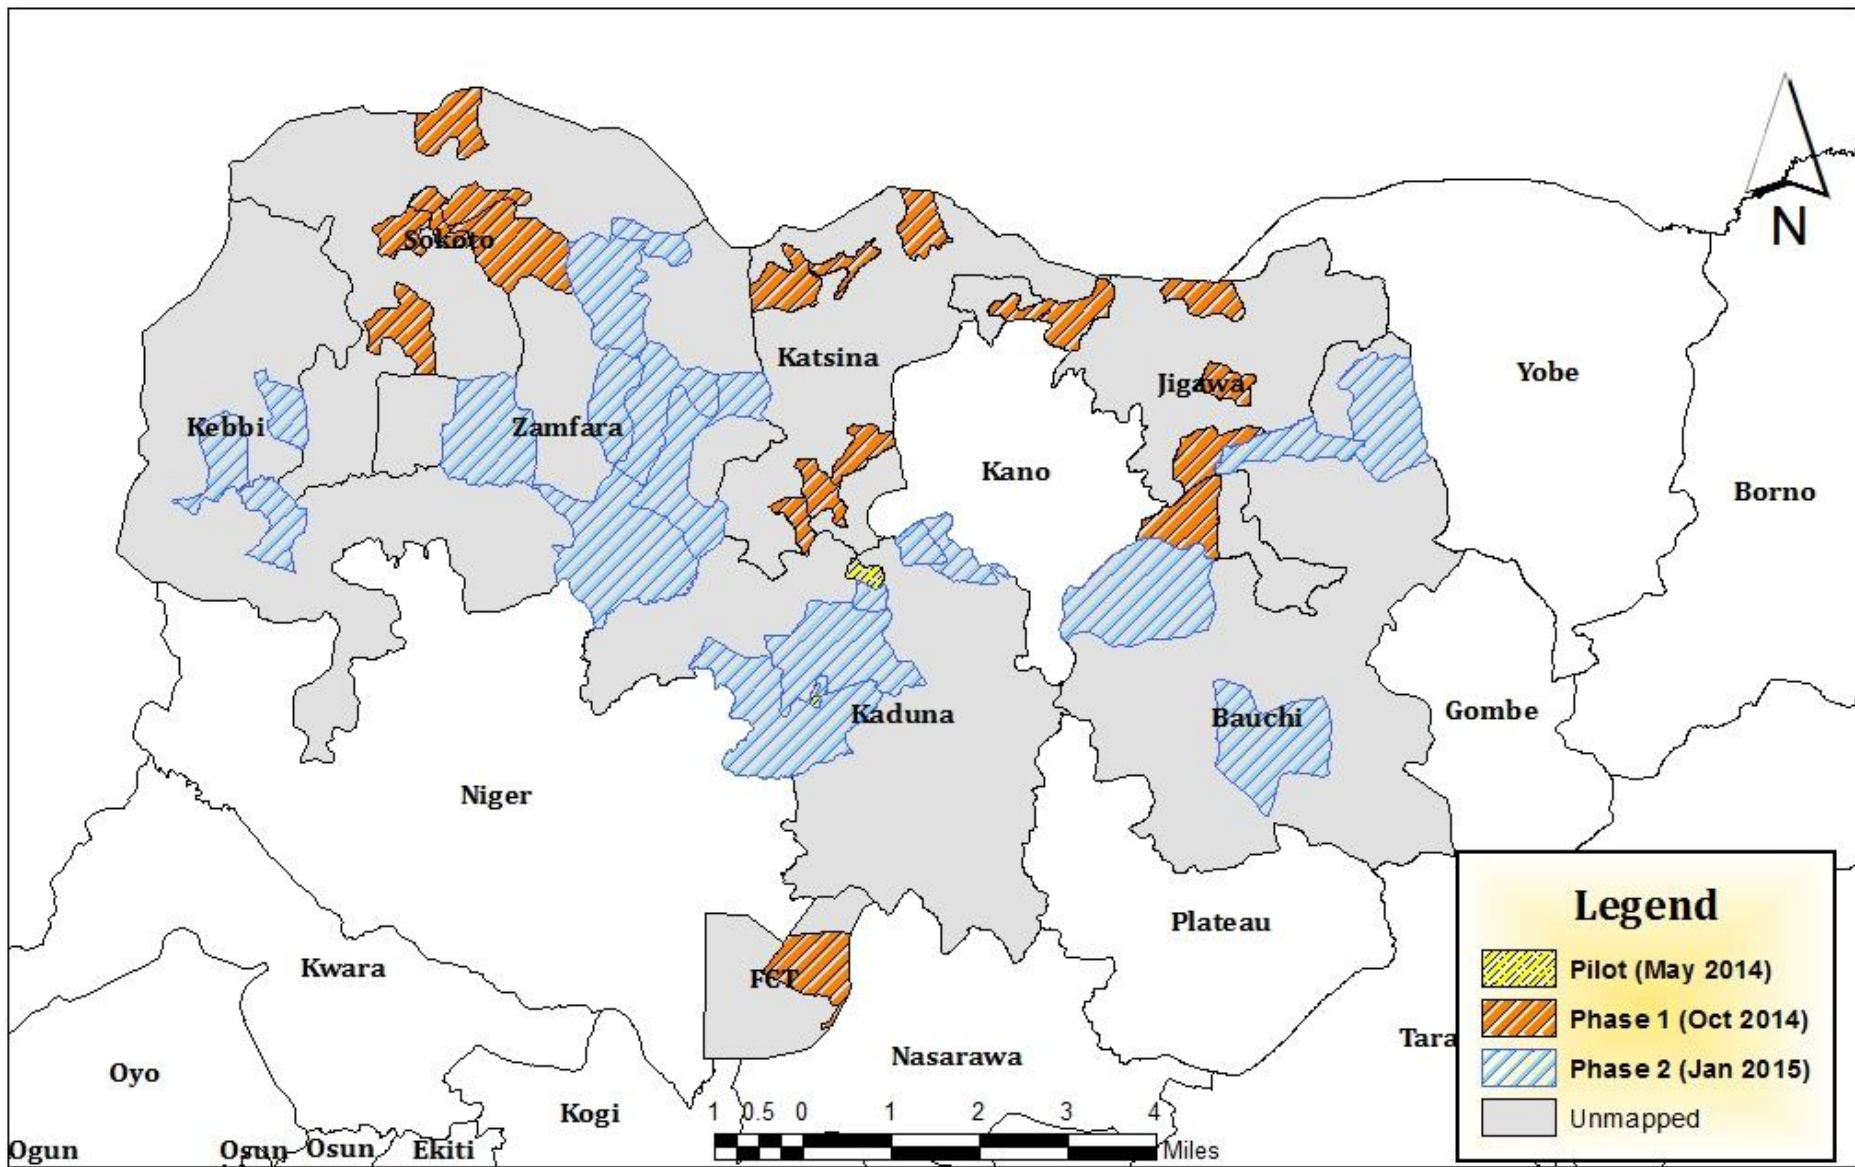

# Training and Fieldwork

- Training
  - Central & State level for supervisors
  - LGA level for interviewers
- Fieldwork
  - Team supervision by NFELTP residents
  - Senior supervision by central and state NSTOP officers
    - Conducted spot checks
    - Assisted with finding settlements and cluster start points

# Data Entry and Analysis

- All data were entered in an electronic database
  - CPro software (free software)
  - In Abuja at the NSTOP office
  - Supervised by NSTOP data management team
  - Hired data clerks + NFELTP residents
- Data analyzed using SAS and SPSS

**LGA RESULTS – MARU,  
ZAMFARA STATE**

## Results of HH visits in MARU LGA

---

|                   | N (%)      |
|-------------------|------------|
| 1+ Eligible child | 159 (82.0) |
| No eligible child | 34 (17.5)  |
| No one home       | 1 (0.5)    |
| Vacant dwelling   | 0 (0.0)    |
| Missing           | 0 (0.0)    |
| Refusal           | 0 (0.0)    |
| <b>Total</b>      | <b>194</b> |

---

## Results of the interview with mother or caregiver of eligible infant age 12-23 months

---

|                         |             |
|-------------------------|-------------|
| Completed questionnaire | 159 (100.0) |
| Mother/Caregiver absent | 0 (0.0)     |
| <b>Total</b>            | <b>159</b>  |

---

# Socio-demographic factors of survey population

|                                                  | <b>MARU LGA</b> |
|--------------------------------------------------|-----------------|
|                                                  | <b>N (%)</b>    |
| <b>Sex</b>                                       |                 |
| Male                                             | 62 (44.0)       |
| Female                                           | 79 (56.0)       |
| <b>Number of children</b>                        |                 |
| 1                                                | 16 (11.3)       |
| 2-4                                              | 58 (41.1)       |
| 5+                                               | 58 (41.1)       |
| Missing/Don't Know                               | 9 (6.4)         |
| <b>Highest level of maternal education</b>       |                 |
| None                                             | 10 (7.1)        |
| Primary                                          | 4 (2.8)         |
| Secondary                                        | 3 (2.1)         |
| Post-secondary                                   | 1 (0.7)         |
| Quranic schools                                  | 122 (86.5)      |
| Missing                                          | 1 (0.7)         |
| <b>Highest level of household head education</b> |                 |
| None                                             | 1 (0.7)         |
| Primary                                          | 4 (2.8)         |
| Secondary                                        | 7 (5.0)         |
| Post-secondary                                   | 5 (3.5)         |
| Quranic schools                                  | 123 (87.2)      |
| Missing                                          | 1 (0.7)         |
| <b>Rural</b>                                     | 127 (90.1)      |
| <b>Urban</b>                                     | 14 (9.9)        |
| <b>Total</b>                                     | <b>141</b>      |

# Access to RI in MARU LGA

---

|                 | N (%)     |
|-----------------|-----------|
| Ever use of RI* | 45 (31.9) |

---

\*denominator = all eligible children (141)

## Vaccination card findings

---

|                                           | N (%)     |
|-------------------------------------------|-----------|
| Ever received a vaccine card <sup>†</sup> | 35 (77.8) |
| Card retention <sup>¶</sup>               | 22 (62.9) |
| Completed cards <sup>§</sup>              | 4 (18.2)  |

---

<sup>†</sup>denominator = ever use of RI (45)

<sup>¶</sup>denominator = ever received vaccine card (35); required interviewer to see card

<sup>§</sup> denominator = card retention (22); complete DD/MM/YY on card for BCG, OPV1/OPV2/OPV3, DPT1/DPT2/DPT3, Measles

\*\*based on revised Nigeria EPI schedule



# Reason for not receiving all vaccinations through routine health services in MARU LGA \*

---

|                                             | N (%)      |
|---------------------------------------------|------------|
| Access to RI                                | 30 (25.9)  |
| Knowledge/Education                         | 42 (36.2)  |
| Illness/Side effects                        | 12 (10.3)  |
| Other: Mother too busy, plan to do it later | 11 (9.5)   |
| Misc                                        | 21 (18.1)  |
| <b>Total</b>                                | <b>116</b> |

---

\*asked of all participants who responded 'no' to any RI and 'no' to receiving all vaccinations; questionnaire responses combined into categories

# MARU Coverage estimates by antigen\*

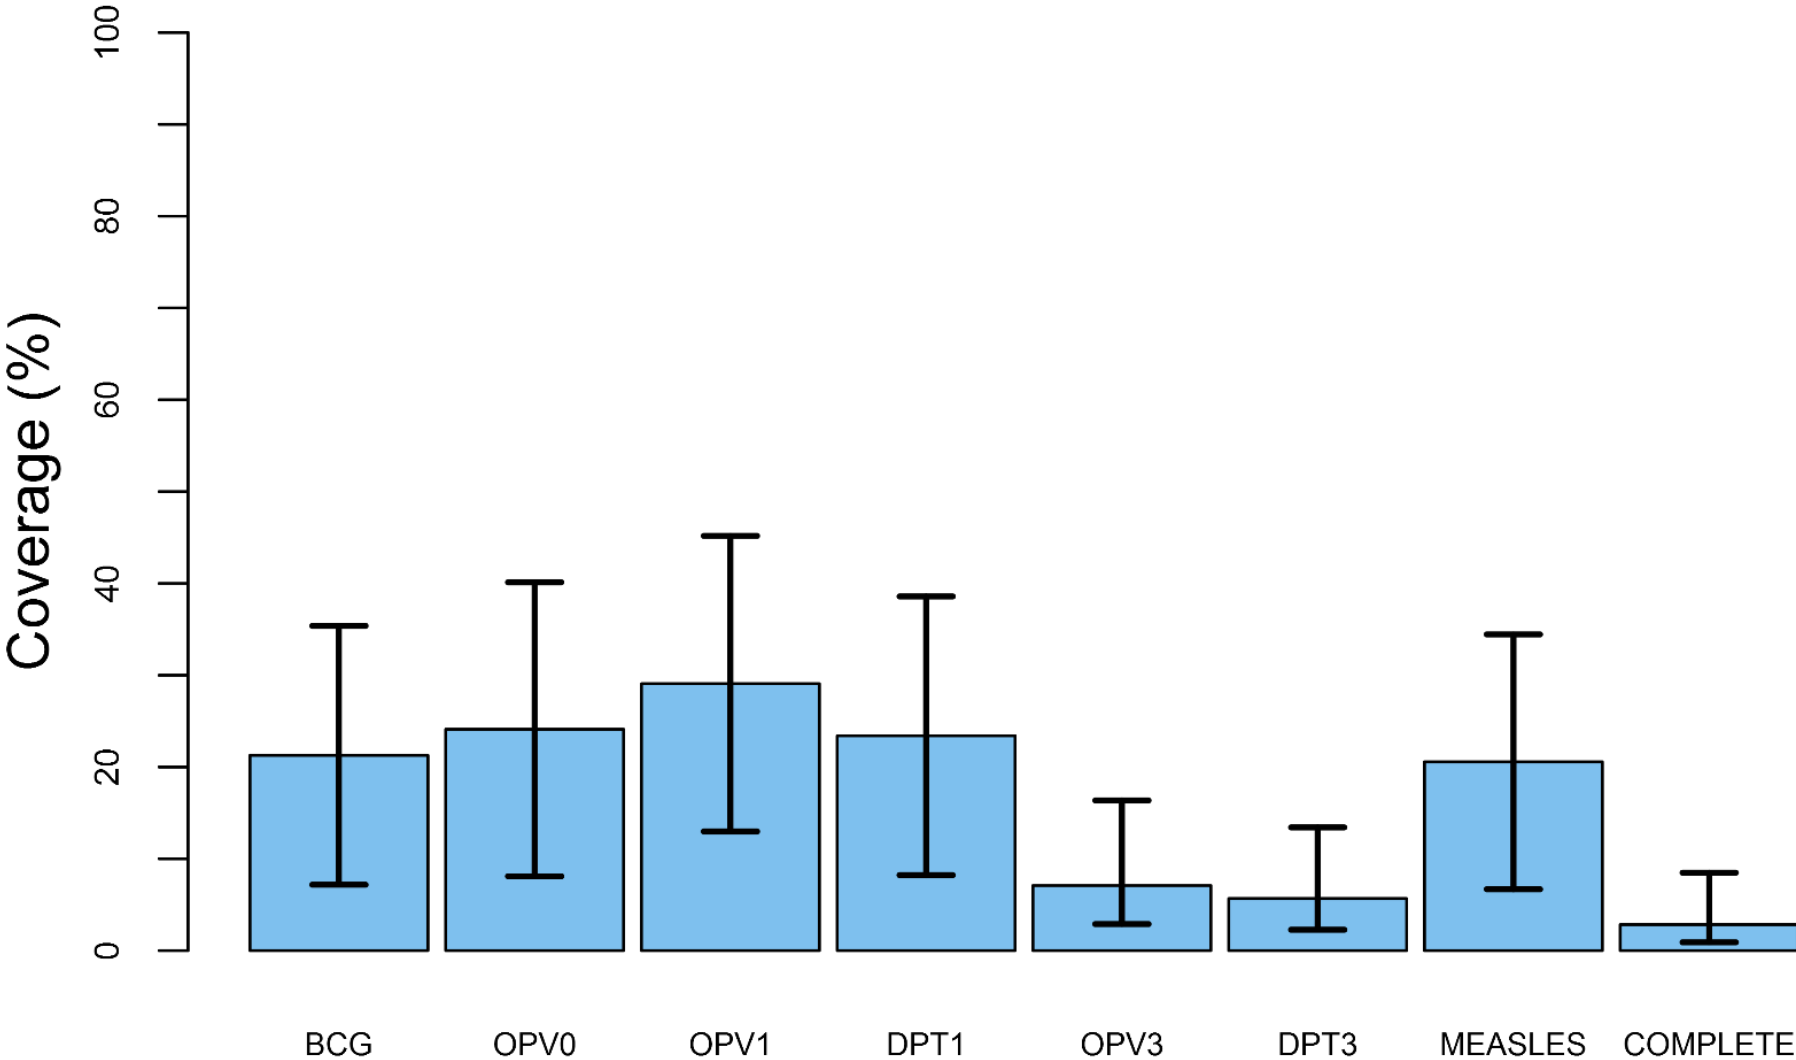

\*all coverage estimates combine maternal recall + vaccine card data; complete coverage = 8 antigens (BCG, OPV 1, DPT 1, OPV 2, DPT 2, OPV 3, DPT 3, Measles); does not include OPV doses from SIAs.

# Source of information about RI in MARU LGA

---

|                                          | <b>N (%)</b> |
|------------------------------------------|--------------|
| Health worker                            | 23 (16.3)    |
| Polio campaign vaccinators               | 5 (3.5)      |
| Loud speaker/town announcer              | 59 (41.8)    |
| Poster/banner                            | 0 (0.0)      |
| Radio                                    | 31 (22.0)    |
| Television                               | 0 (0.0)      |
| Mobile telephone/SMS                     | 0 (0.0)      |
| Newspapers/magazines                     | 0 (0.0)      |
| Husband/family/neighbor/friends          | 0 (0.0)      |
| Women's groups                           | 1 (0.7)      |
| Mosque/church                            | 0 (0.0)      |
| Community leader                         | 0 (0.0)      |
| Community mobilizer/VCM                  | 20 (14.2)    |
| Not heard of routine immunization before | 1 (0.7)      |
| Don't know                               | 1 (0.7)      |
| Missing                                  | 0 (0.0)      |
| <b>Total</b>                             | <b>141</b>   |

---

# Reasons to vaccinate in MARU LGA

---

|                                                                                   | N (%)      |
|-----------------------------------------------------------------------------------|------------|
| <b>What information helps to decide to vaccinate children through RI services</b> |            |
| Safety of vaccine                                                                 | 101 (71.6) |
| Side effects of the vaccine                                                       | 0 (0.0)    |
| Why vaccinating my child is important                                             | 14 (9.9)   |
| What diseases vaccines protect against                                            | 4 (2.8)    |
| If sick children can receive the vaccine                                          | 1 (0.7)    |
| Time/place for routine vaccination near my home                                   | 7 (5.0)    |
| Schedule for vaccination of child                                                 | 8 (5.7)    |
| Whether my husband/family approves                                                | 5 (3.5)    |
| Whether my religious leader approves                                              | 0 (0.0)    |
| Whether my community leader approves                                              | 0 (0.0)    |
| Other                                                                             | 1 (0.7)    |
| Missing                                                                           | 0 (0.0)    |
| <b>Total</b>                                                                      | <b>141</b> |

---

# Participation in SIAs in MARU LGA

---

|                                                                                       | N (%)      |
|---------------------------------------------------------------------------------------|------------|
| <b>Participation in <u>December 2014</u> SIA</b>                                      | 121 (85.8) |
| <b>Reason for not participating</b>                                                   |            |
| House not visited by team                                                             | 3 (15.0)   |
| Child absent                                                                          | 0 (0.0)    |
| Vaccine safety/fear of adverse event                                                  | 0 (0.0)    |
| No felt need                                                                          | 0 (0.0)    |
| Religious/cultural reasons                                                            | 0 (0.0)    |
| Political reasons                                                                     | 1 (5.0)    |
| Too many rounds                                                                       | 0 (0.0)    |
| Other unmet health needs                                                              | 0 (0.0)    |
| Mother refused, no reason given                                                       | 0 (0.0)    |
| Husband/head of HH refused                                                            | 0 (0.0)    |
| Child sick                                                                            | 1 (5.0)    |
| No mother/cargiver consent given                                                      | 2 (10.0)   |
| Unhappy wth team                                                                      | 0 (0.0)    |
| Postponed until another time                                                          | 0 (0.0)    |
| Not aware of campaign                                                                 | 1 (5.0)    |
| Campaign vaccine is not as good as vaccine<br>offered through routine health services | 0 (0.0)    |
| Don't know                                                                            | 7 (35.0)   |
| Other                                                                                 | 0 (0.0)    |
| Missing                                                                               | 5 (25.0)   |
| <b>Total</b>                                                                          | <b>20</b>  |

---

# Participation in SIAs in MARU LGA

---

|                                                                                       | <b>N (%)</b>      |
|---------------------------------------------------------------------------------------|-------------------|
| <b>Participation in <u>November 2014</u> SIA</b>                                      | <b>120 (85.1)</b> |
| <b>Reason for not participating</b>                                                   |                   |
| House not visited by team                                                             | 3 (14.3)          |
| Child absent                                                                          | 1 (4.8)           |
| Vaccine safety/fear of adverse event                                                  | 1 (4.8)           |
| No felt need                                                                          | 0 (0.0)           |
| Religious/cultural reasons                                                            | 0 (0.0)           |
| Political reasons                                                                     | 1 (4.8)           |
| Too many rounds                                                                       | 0 (0.0)           |
| Other unmet health needs                                                              | 0 (0.0)           |
| Mother refused, no reason given                                                       | 0 (0.0)           |
| Husband/head of HH refused                                                            | 1 (4.8)           |
| Child sick                                                                            | 0 (0.0)           |
| No mother/cargiver consent given                                                      | 0 (0.0)           |
| Unhappy wth team                                                                      | 0 (0.0)           |
| Postponed until another time                                                          | 0 (0.0)           |
| Not aware of campaign                                                                 | 1 (4.8)           |
| Campaign vaccine is not as good as vaccine<br>offered through routine health services | 0 (0.0)           |
| Don't know                                                                            | 8 (38.1)          |
| Other                                                                                 | 0 (0.0)           |
| Missing                                                                               | 5 (23.8)          |
| <b>Total</b>                                                                          | <b>21</b>         |

---

# Source of information about Polio SIAs in MARU LGA

---

|                                                         | N (%)      |
|---------------------------------------------------------|------------|
| <b>Main source of information about polio campaigns</b> |            |
| Health worker                                           | 22 (15.6)  |
| Polio campaign vaccinators                              | 4 (2.8)    |
| Loud speaker/town announcer                             | 59 (41.8)  |
| Poster/banner                                           | 0 (0.0)    |
| Radio                                                   | 30 (21.3)  |
| Television                                              | 0 (0.0)    |
| Mobile telephone/SMS                                    | 0 (0.0)    |
| Newspapers/magazines                                    | -          |
| Husband/family/neighbor/friends                         | 0 (0.0)    |
| Women's groups                                          | 1 (0.7)    |
| Mosque/church                                           | 0 (0.0)    |
| Community mobilizer/VCM                                 | 23 (16.3)  |
| Not heard of polio campaigns                            | 1 (0.7)    |
| Don't know                                              | 1 (0.7)    |
| Other                                                   | 0 (0.0)    |
| Missing                                                 | 0 (0.0)    |
| <b>Total</b>                                            | <b>141</b> |

---

# **SUMMARY: COMPARISON OF ALL PHASE 1 & PHASE 2 LGAS**



# BCG Routine Immunization Coverage by LGA

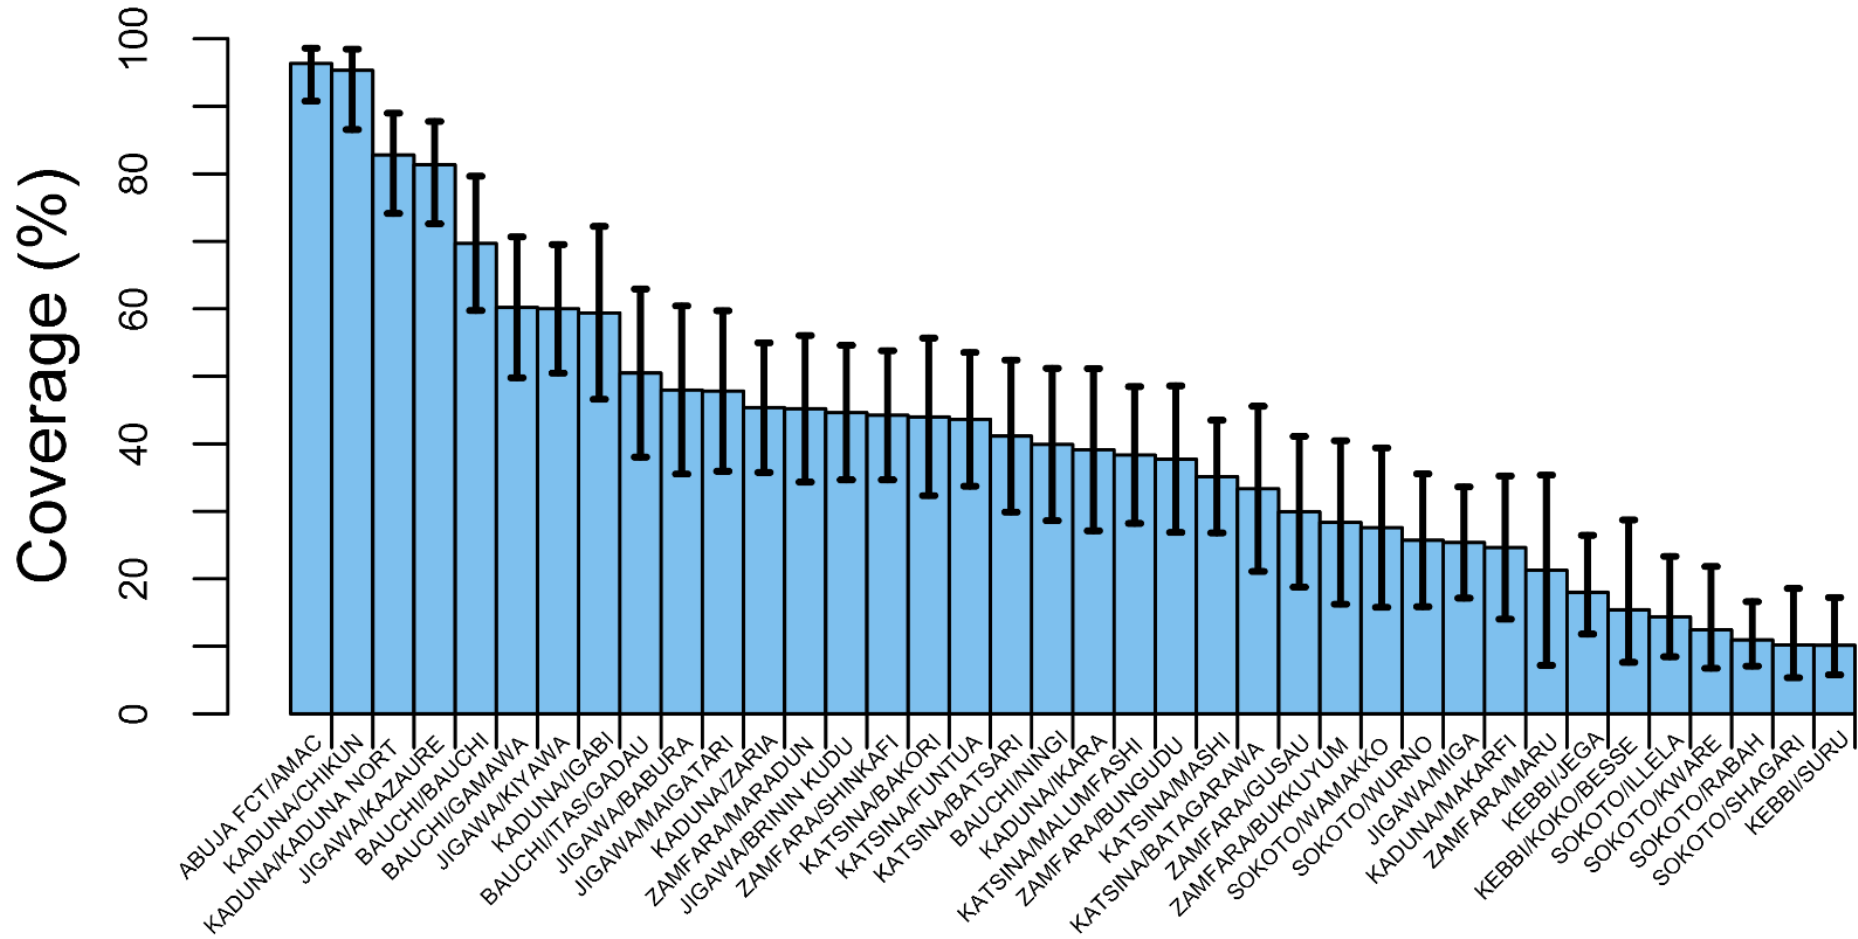

# DPT1 Routine Immunization Coverage by LGA

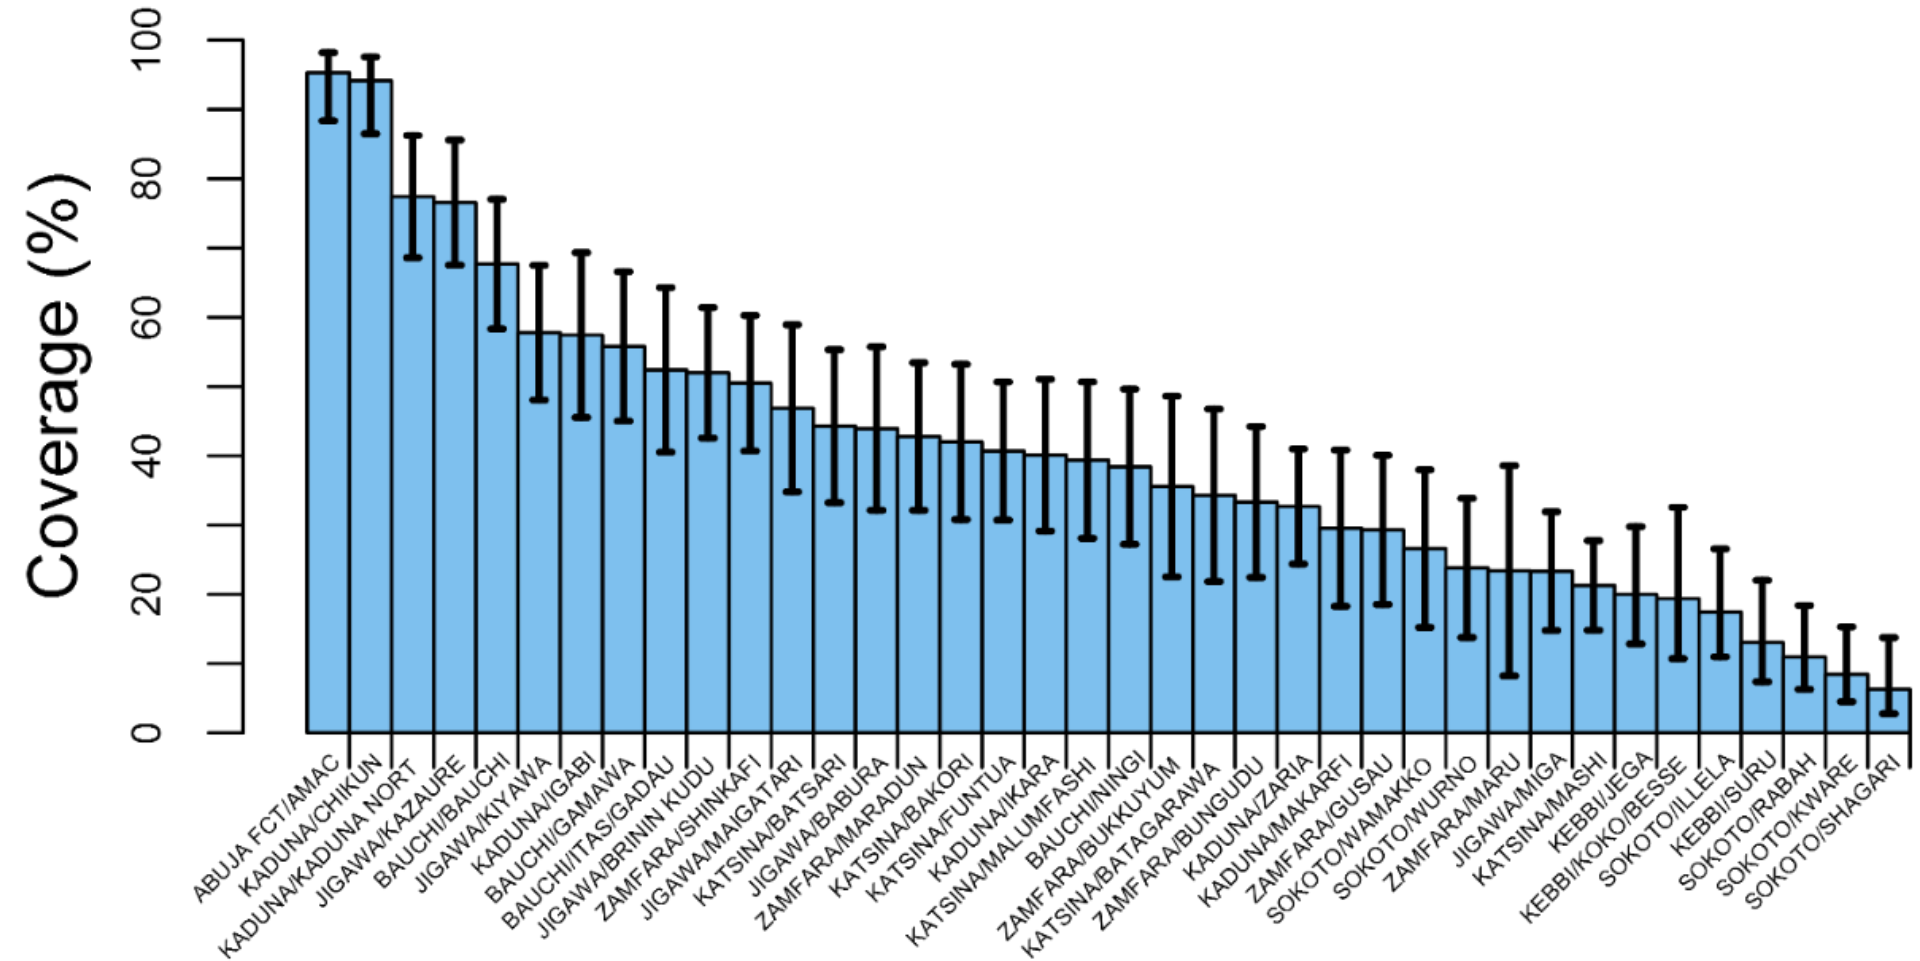

# DPT3 Routine Immunization Coverage by LGA

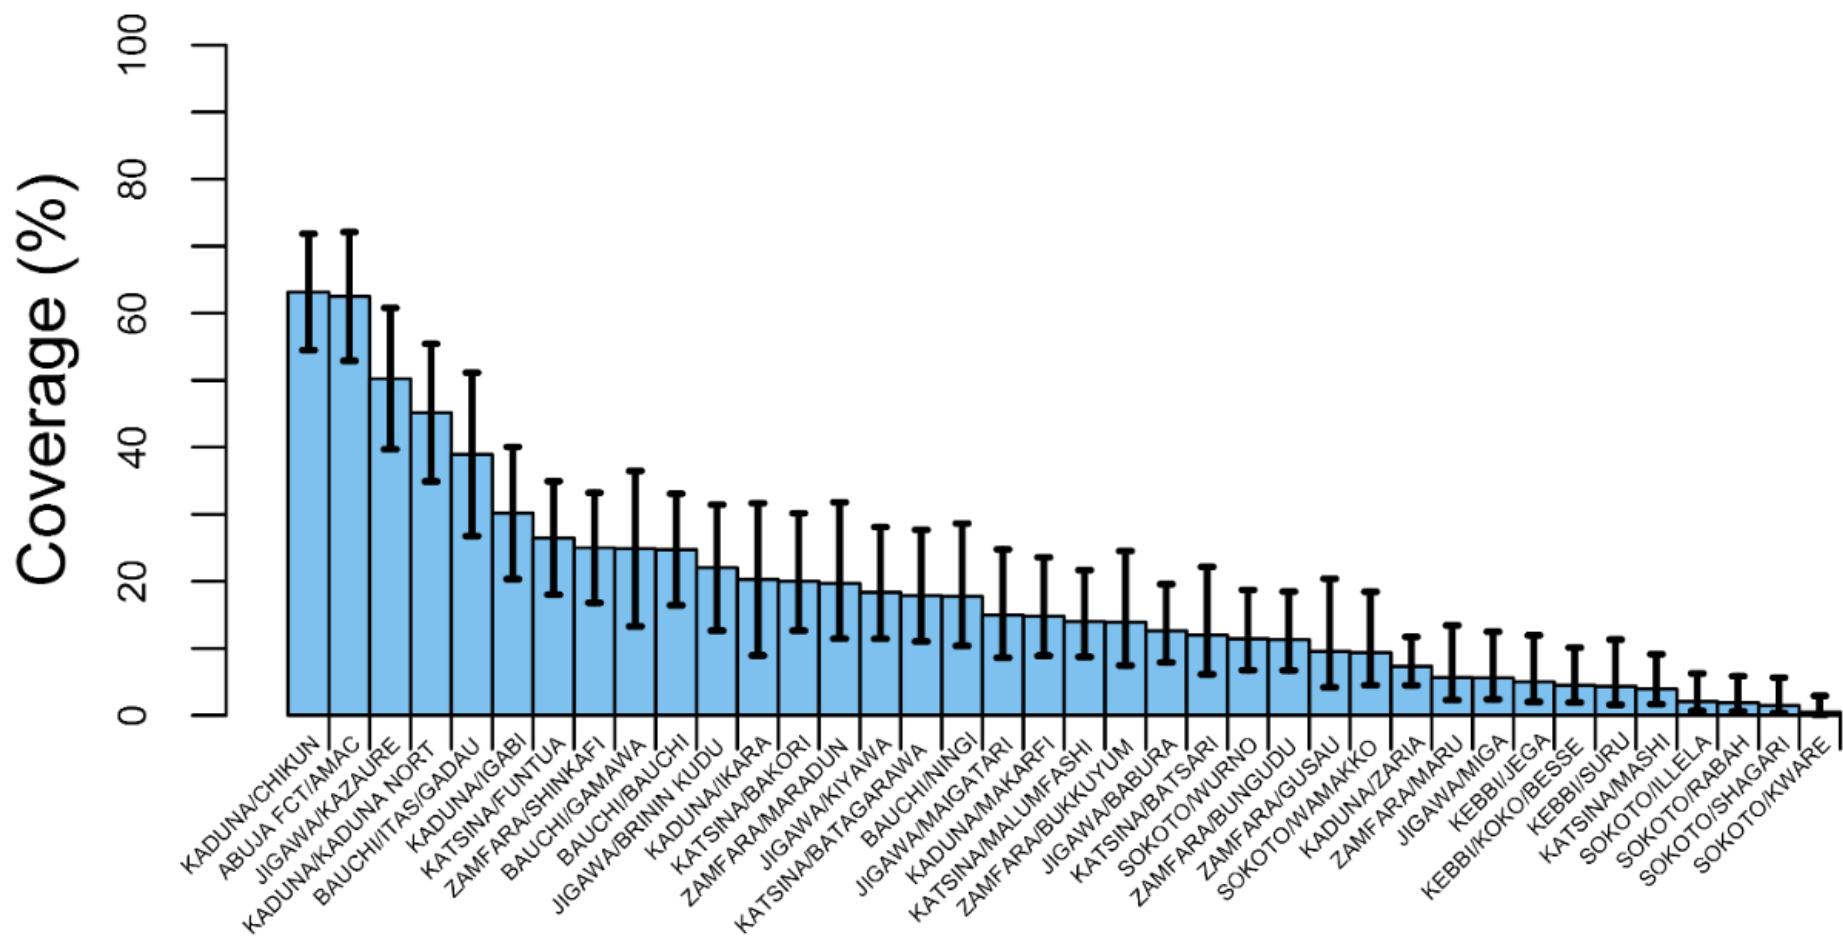

## RI DPT3 Vaccination Coverage, Northern Nigeria

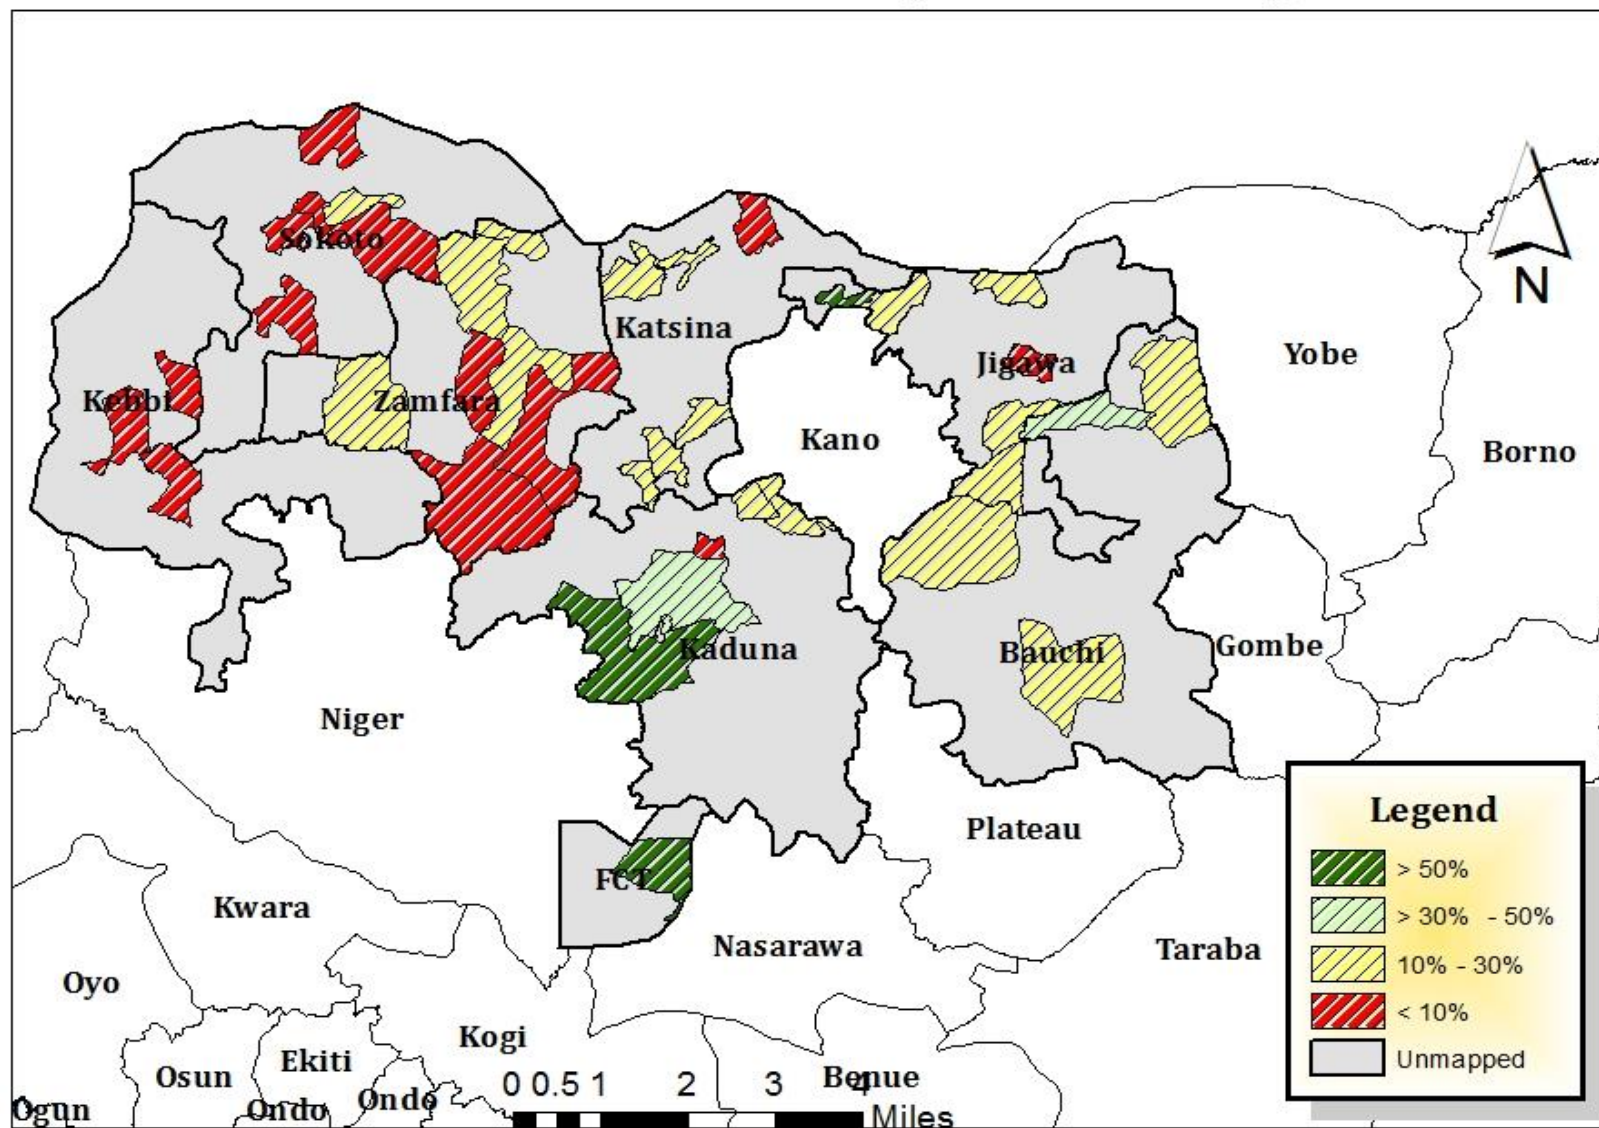

# OPV0 Routine Immunization Coverage by LGA

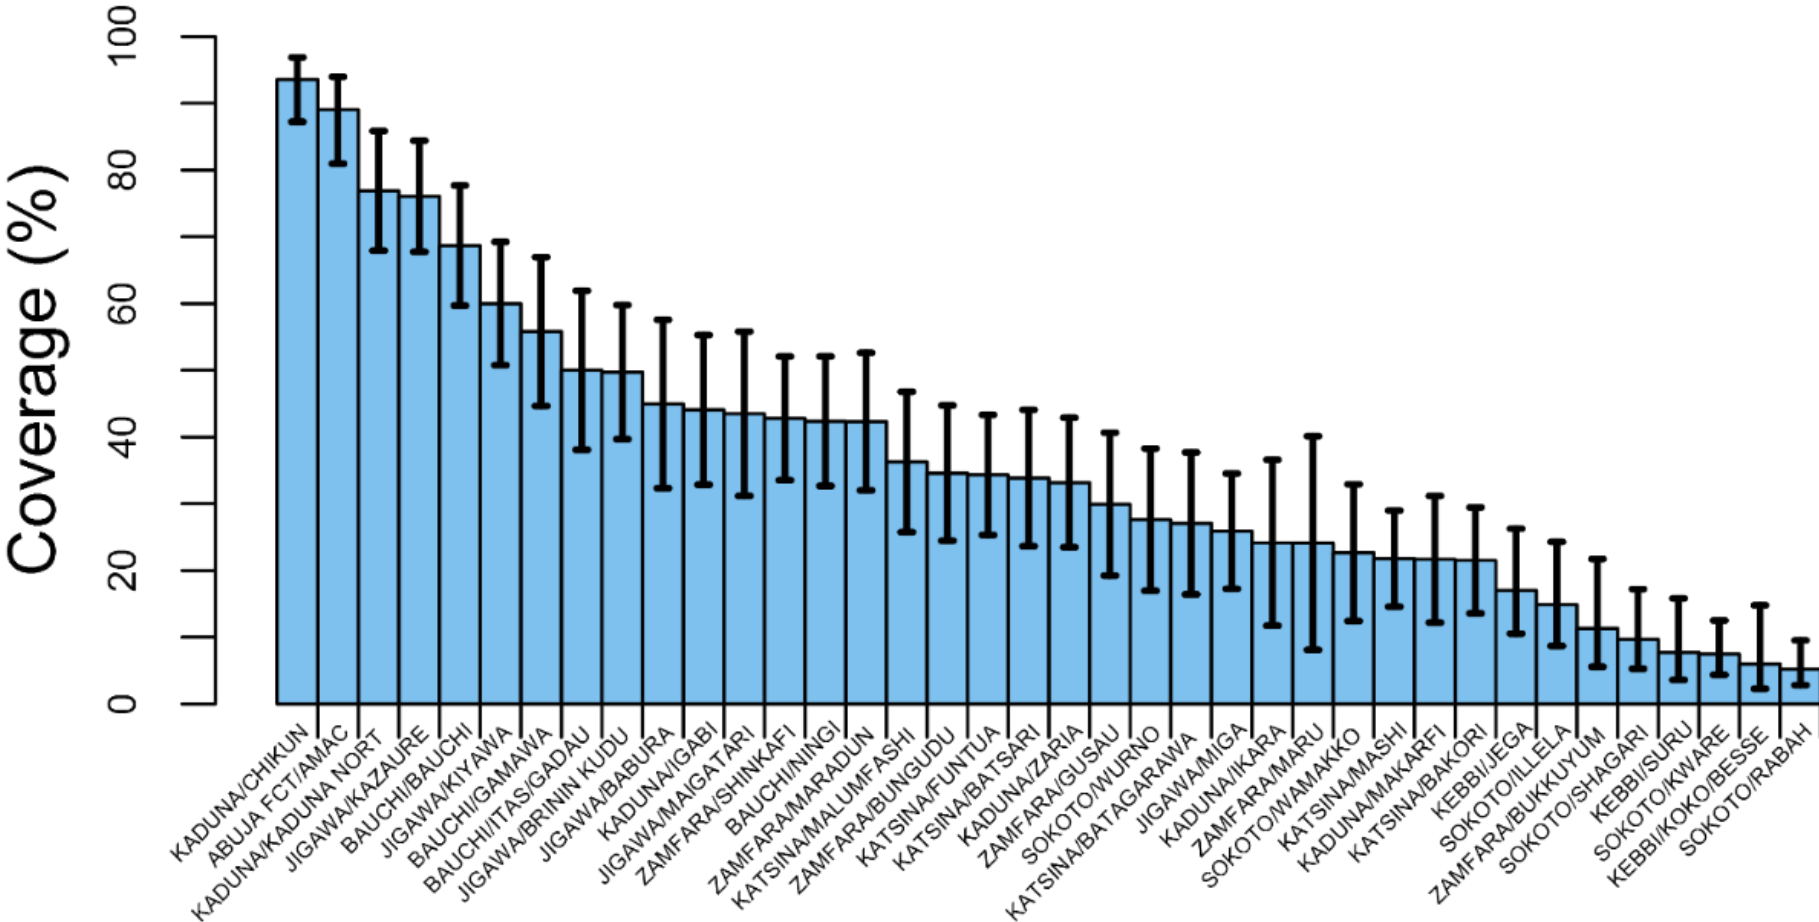

# OPV1 Routine Immunization Coverage by LGA

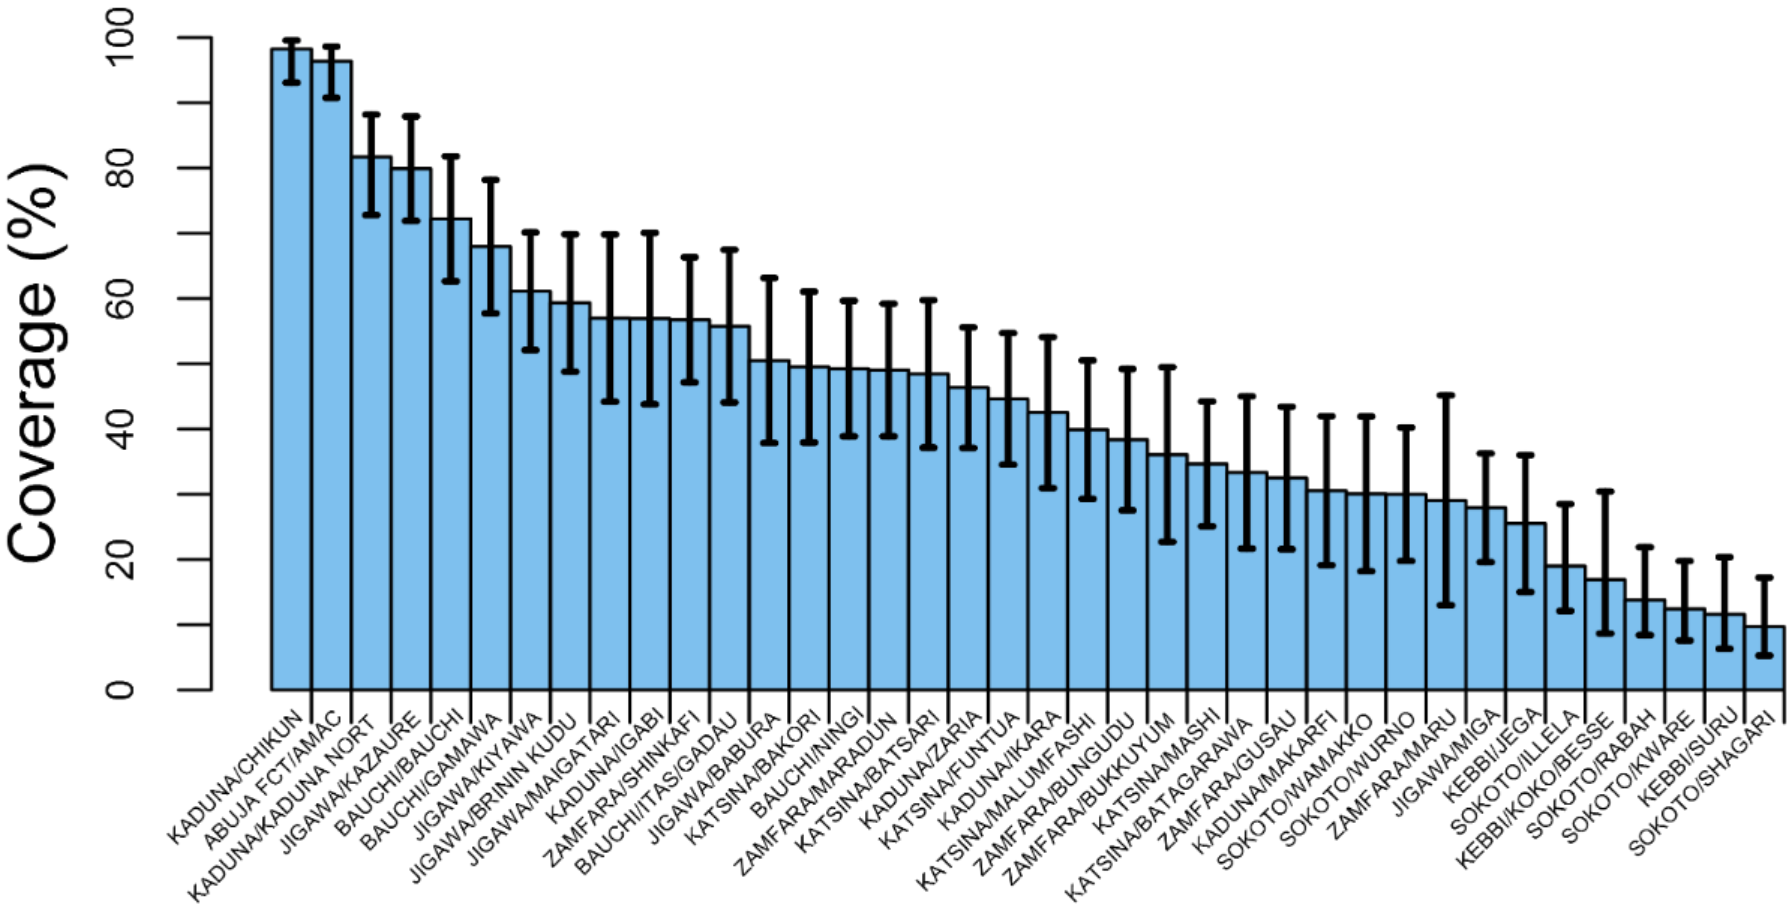

# OPV3 Routine Immunization Coverage by LGA

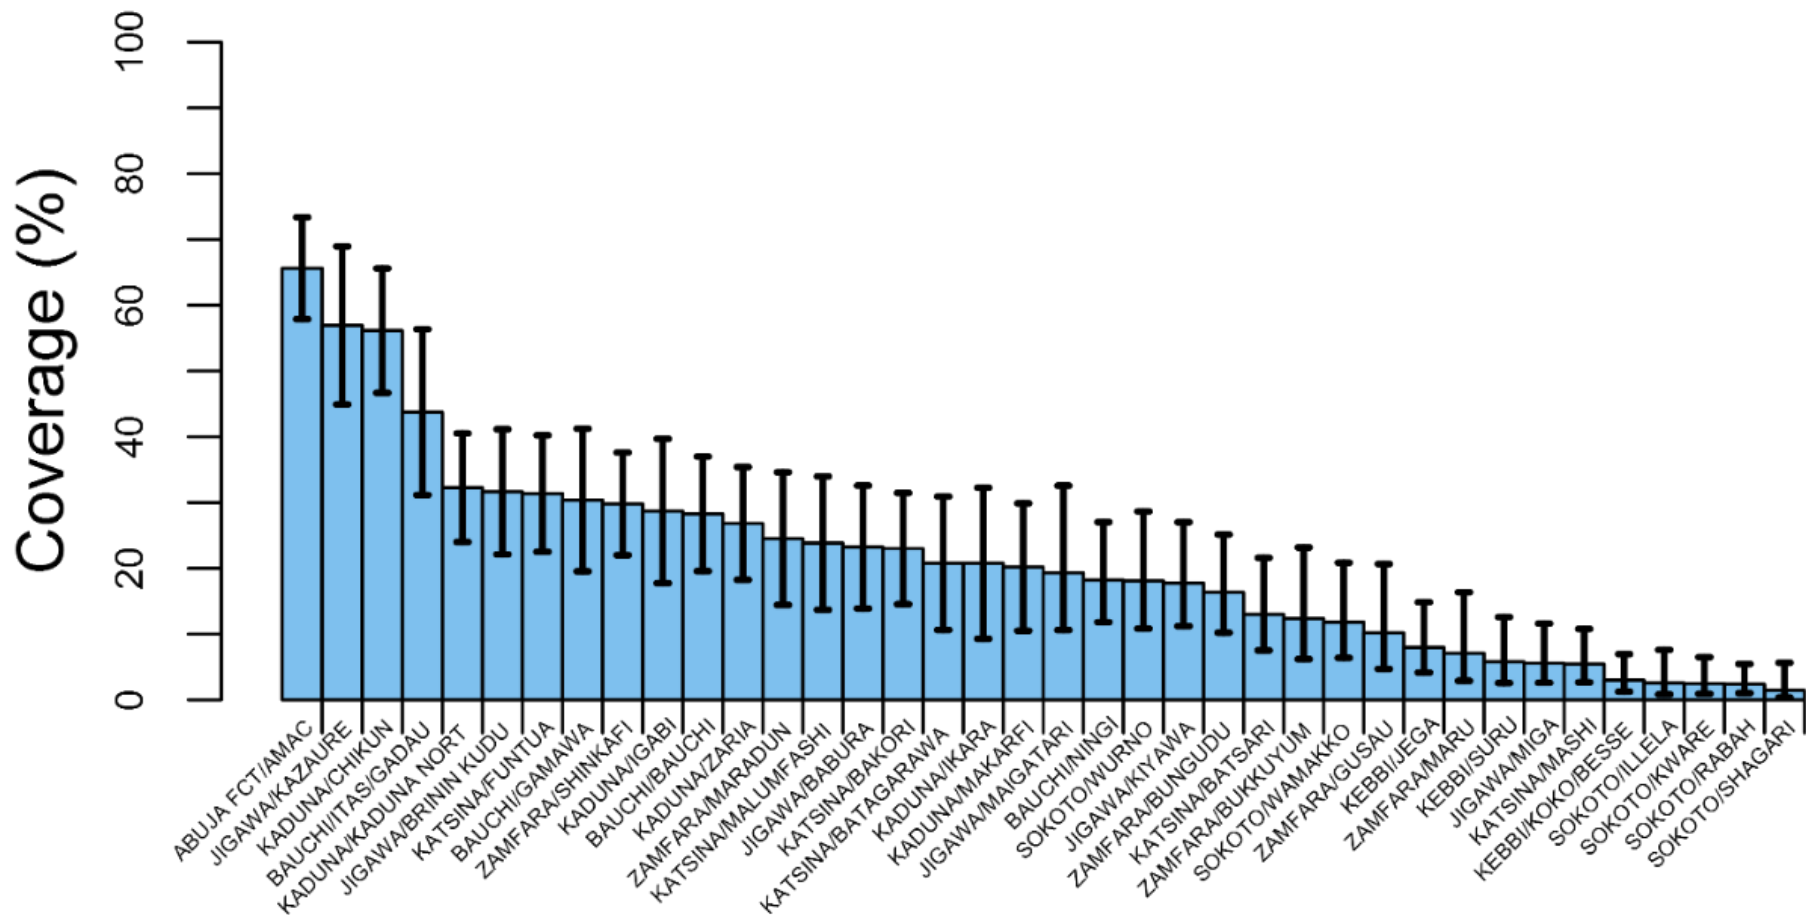

# Measles Routine Immunization Coverage by LGA

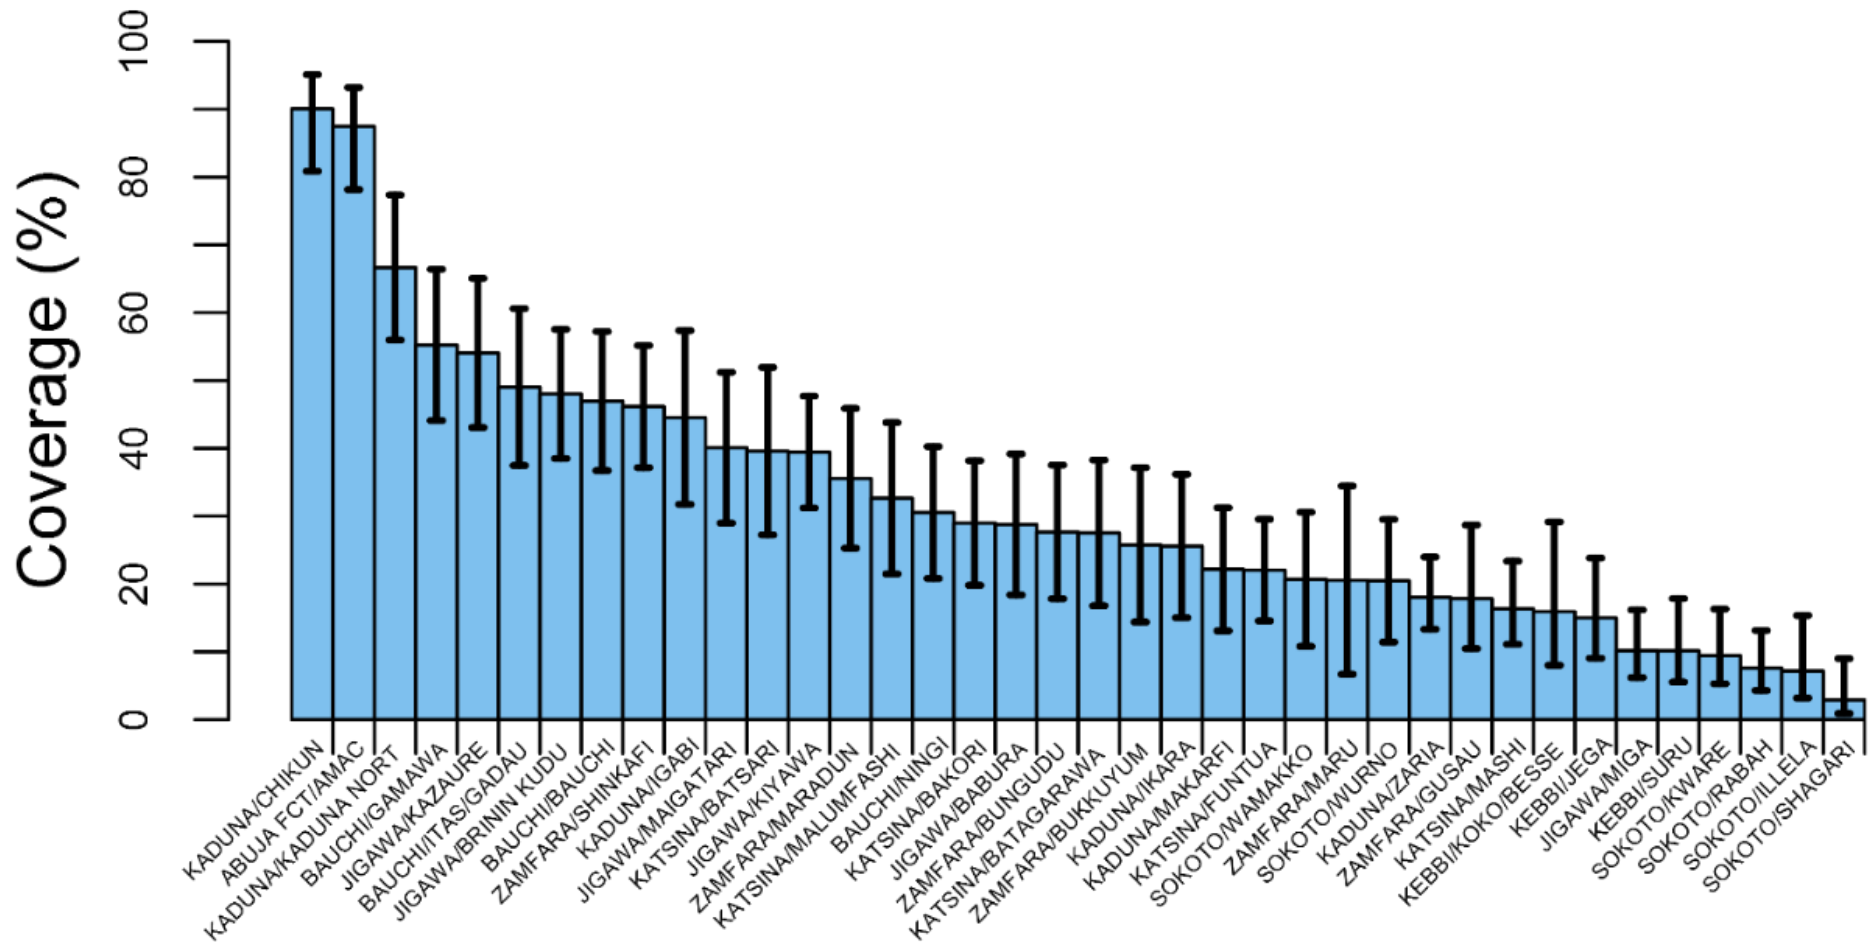



# Complete Routine Immunization Coverage by LGA

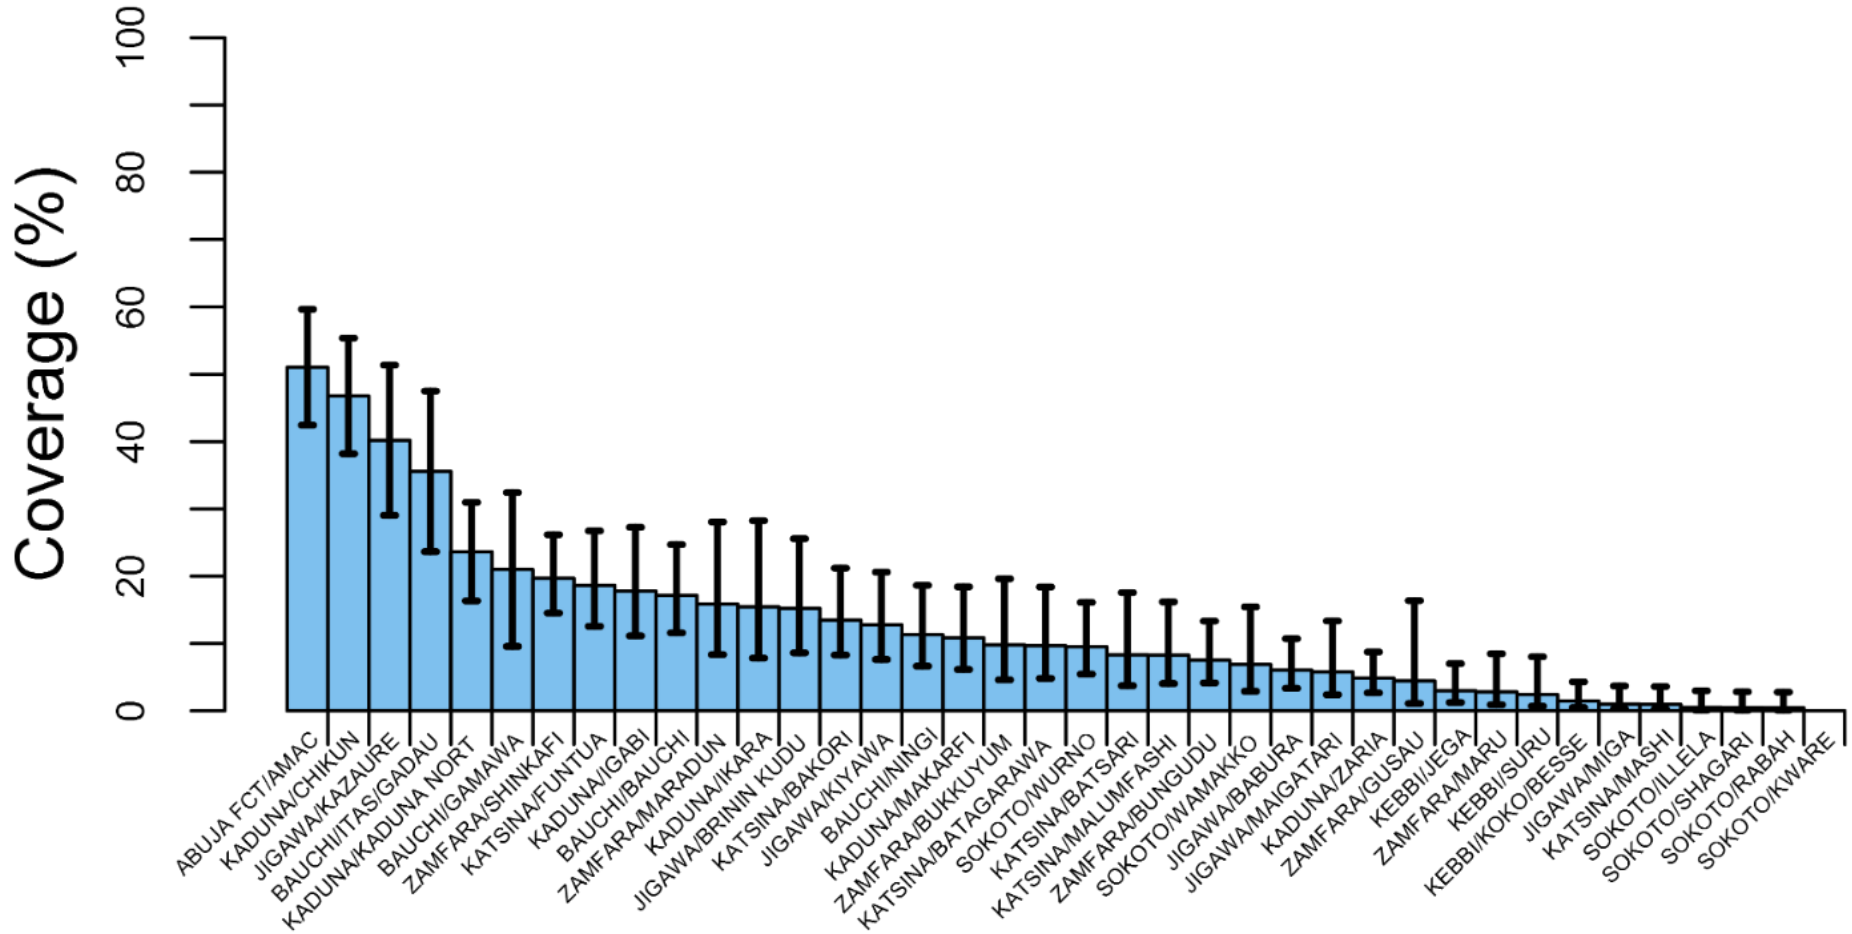

# RI Complete Vaccination Coverage, Northern Nigeria

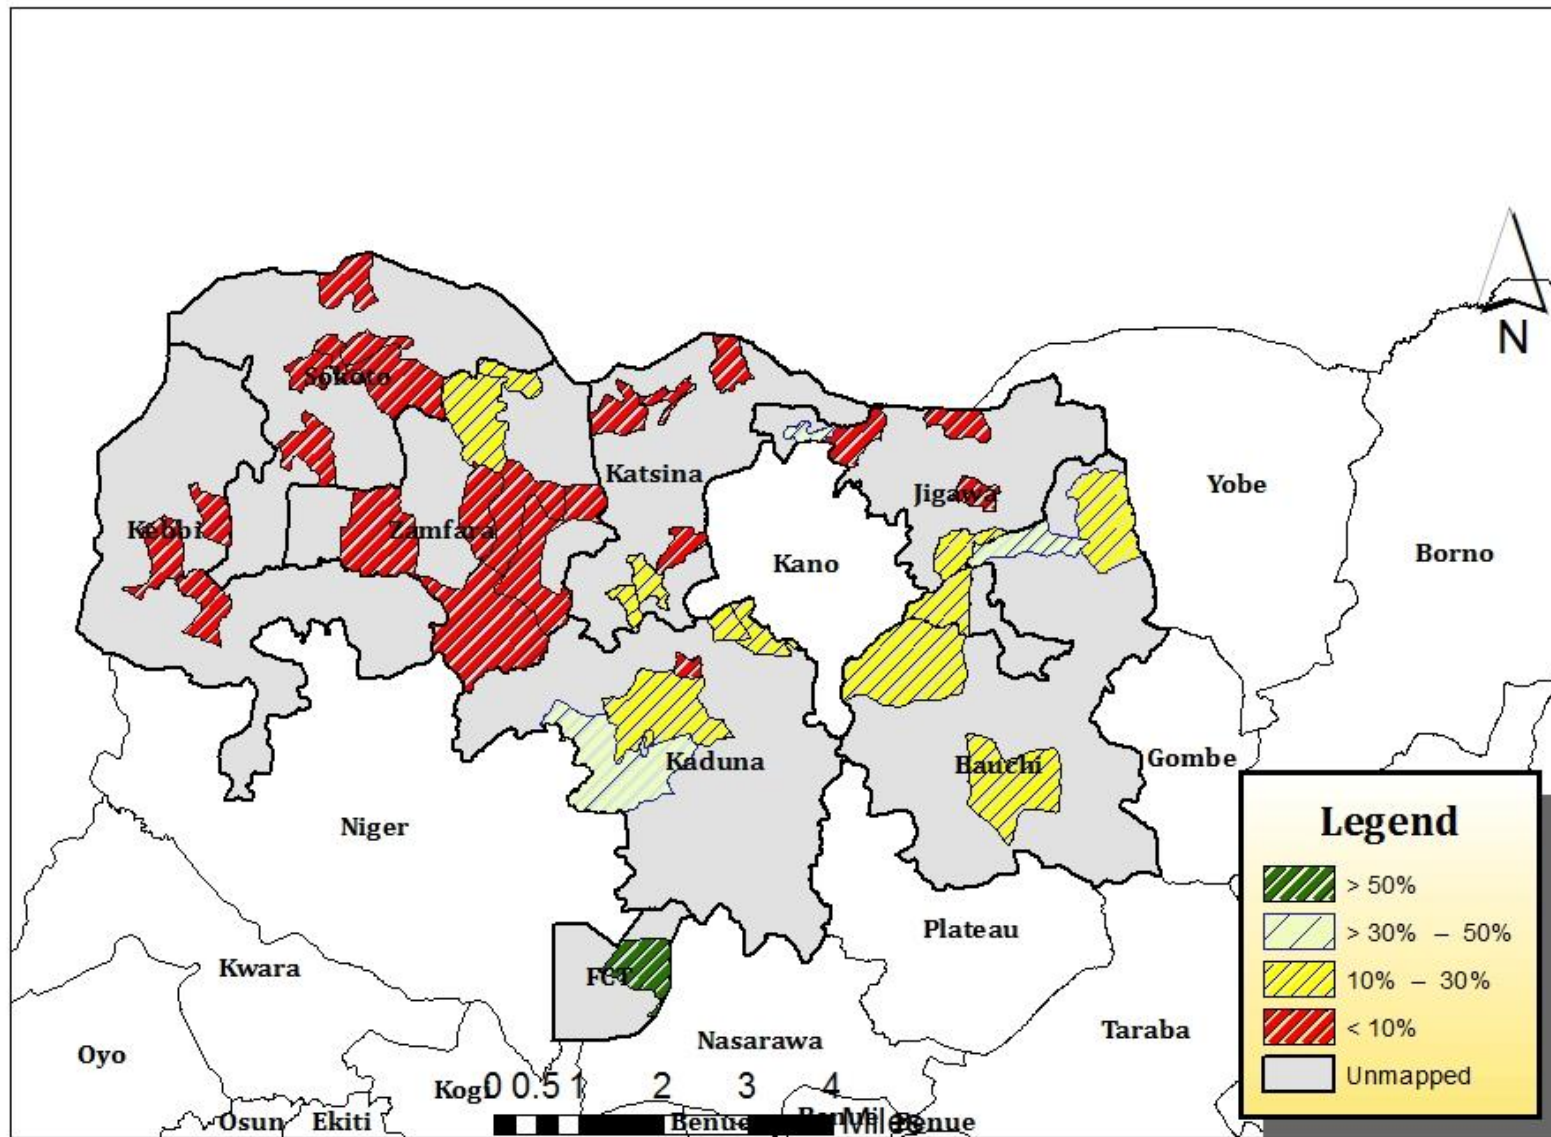

# Conclusions – overall survey

- Range of RI coverage exists; low in most LGAs
- Coverage estimates similar to DHS state trends
- Variation seen between LGAs within states
- Reported SIA participation lower than LQAS in certain LGAs
- KAP questions
  - Lack of knowledge/education/access to RI most common reasons for non-vaccination
  - Lack of knowledge more predominant in low coverage rural LGAs
  - Loud speaker/town announcer/radio more common source of information in rural areas; health worker most common source in urban areas
  - Husband/HH acceptance more important in traditional, rural households
- Survey methodology
  - Survey methodology and data quality improved with each phase of survey
  - Inconsistent/missing documentation of dates of vaccines on card

# Summary – MARU LGA

- Sociodemographic
  - Geography
    - Mainly rural clusters (90.1%)
  - Education
    - Highest proportion of level of maternal education is Quranic school (86.5%)
    - Highest proportion of level of household head education is Quranic school (87.2%)

# Summary – MARU LGA

- Use of RI
  - Reported use of RI services sub-optimal (31.9%)
  - DPT3 coverage low (<10.0% )
  - Lack of knowledge/education most common obstacle to using RI (36.2%)
  - Safety of vaccine reported most important in decision making for vaccination (71.6%)
  - Most common source of RI information is Loud speaker/Town announcer(41.8%)
- SIAs
  - Most common reasons for non participation
    - Don't know (35%)
    - No vaccine team visit (15%)
  - Common sources of SIA information
    - Loud speaker/Town announcer (41.8%)
    - Radio (21.3%)

# Survey limitations

- Only high risk polio LGAs surveyed
- ‘Empty’ clusters
  - Nomadic settlements
  - Insecurity
- Unable to analyze sub-populations due to small sample sizes
- Restricted analysis of timeliness of vaccination due to sparse vaccine card data
